# Supplementary material for: Identification of potential biomarkers for diagnosis of syphilis from the cerebrospinal fluid based on untargeted metabolomic analysis
Source: Royal Society of Chemistry journal article supplement (doi:10.1039/d3mo00026e), 2023-04-19
Supplement: d3mo00026e1.xlsx [file d3mo00026e1.xlsx]

## Sheet: Sheet1
Supplementary Table 1. Information of indentified metabolites in metabolomic analysis.
ESI mode	Molecular Weight	RT [min]	HMDB ID	Compound_name	Formula	Monoisotopic_Mass	Delta(ppm)	QC01	QC02	QC03	QC04	QC05	QC06	QC07	QC08	QC09	QC10	F73	F74	F75	F76	F77	F78	F93	W37	W38	W39	W40	W41	W42	W43	W44	W79	Y1	Y2	Y3	Y4	Y5	Y6	Y7	Y8	Y9	Y10	Y11	Y12	Y13	Y14	Y15	Y16
ESI-	72.0198	0.788	HMDB0006112	Malondialdehyde	C3H4O2	72.0211	19	43.3027	57.0399	51.1294	34.3861	41.4496	36.497	47.3069	50.6915	42.0809	38.3985	37.4525	34.4	34.1957	17.8727	19.6888	42.9282	9.87711	29.5587	42.0796	36.0465	42.8545	14.6444	42.7558	42.63	61.5346	33.7369	44.9256	23.4869	33.294	35.3096	49.3627	42.3159	36.4412	50.0536	29.263	31.7	35.4778	32.384	60.7409	49.4898	42.7294	42.6162
ESI-	76.0148	0.802	HMDB0000115	Glycolic acid	C2H4O3	76.016	17	2078.51	3069.35	2093.03	2647.08	2713.72	2860.99	2835.55	2615.18	2898.99	2546.07	1486.35	1839.73	1240.22	1806.23	1112.77	3884.28	4971.76	3442.53	2652.83	5001.05	3488.01	2186.49	3553.95	1632.67	3588.72	3334.29	3181.9	1818.56	3180.46	1600.75	4666.45	3499.44	3213.56	5062.87	2709.61	913.122	2922.86	2637.49	2778.18	2926.07	2295.12	3278.62
ESI-	88.0155	0.811	HMDB0000243	Pyruvic acid	C3H4O3	88.016	6	1951.13	1767.47	1486.12	1682.07	1377.36	153.084	1440.86	1279.58	2496.83	1338.63	880.294	355.874	227.648	364.318	605.051	620.58	69.2212	1162.74	140.255	42.5804	377.483	1697.57	909.259	1530.31	224.534	2474.81	678.73	3817.93	547.297	2094.76	1446.64	1026.04	734.907	459.393	1070.5	2202.5	1535.22	676.712	86.9049	2762.97	1453.16	22.18
ESI-	88.051	1.931	HMDB0001873	Isobutyric acid	C4H8O2	88.0524	16	20.519	19.8811	19.8063	18.7232	16.8949	16.2988	14.9343	16.8381	15.466	16.7661	19.0629	12.1197	8.54897	13.6135	10.0461	15.0533	13.9975	16.4235	15.0025	20.1237	22.3765	8.35493	17.3532	19.6849	27.5836	13.2481	26.9421	15.5147	14.8091	16.8335	25.3263	32.7701	18.3324	27.6982	19.0449	23.0878	9.76013	19.1598	15.1791	12.7424	12.3213	12.9161
ESI-	90.0303	0.84	HMDB0000190	L-Lactic acid	C3H6O3	90.0317	16	6066.58	5625.12	5664.02	5079.49	4905.93	5280.19	5069.63	4950.42	4883.73	4809.93	7619.29	3456.63	4929.11	4024.49	5887.19	4919.94	1987.72	3353.33	5447.28	5810.9	4724.3	6334.5	4857.43	4522.63	5170.94	4547.93	6970.27	4451.97	4930.91	5741.75	6036.59	6022.29	6447.06	5197.24	5411.61	4886.76	4340.98	5325.1	8466.77	5426.11	6141.59	5054.66
ESI-	97.966	15.043	HMDB0001448	Sulfate	H2O4S	97.9674	15	404.419	414.269	346.281	353.422	818.913	428.142	355.374	680.064	417.688	692.237	701.736	296.286	714.429	725.573	748.176	341.492	875.958	441.076	393.446	618.562	398.208	283.546	367.702	634.894	296.135	336.096	462.037	471.868	264.84	336.633	416.045	222.903	374.471	414.498	329.64	331.651	318.55	343.539	290.071	292.151	361.124	300.057
ESI-	97.9757	1.497	HMDB0001429	Phosphate	H3O4P	97.9769	13	44.3334	47.117	42.7454	28.3972	42.6855	45.011	41.0725	44.5318	39.6262	36.8752	28.3342	41.4094	33.7727	31.9268	28.9027	32.558	6.5933	32.8584	29.0288	40.9506	43.6024	35.4011	51.3136	37.2743	42.7788	37.2641	46.4019	32.9793	41.003	52.825	58.5009	46.9709	40.9991	48.2336	43.2018	40.4836	42.7016	46.2321	35.1564	36.8991	34.4774	41.0624
ESI-	100.015	0.817	HMDB0032523	Succinic anhydride	C4H4O3	100.016	14	2873.99	2679.15	2524.95	2829.56	2310.62	2272.53	2250.14	2187.4	3412.51	2134.42	2215.57	788.782	1394.74	1499.53	985.275	2315.47	125.572	2617.79	733.198	377.919	1857.12	2154.68	2704.82	1690.42	1103.64	2860.51	2514.59	3006.86	2961.12	2455.76	2158.62	1606.99	2118.26	2084.78	1965.27	1943.7	2474.59	2542.98	967.972	2575.45	2974.97	880.712
ESI-	100.051	1.962	HMDB0032459	2-Pentenoic acid	C5H8O2	100.052	12	80.8564	88.1722	87.6829	85.9345	79.6144	74.1023	79.3816	82.5986	91.3879	68.5204	32.3074	49.3181	88.5156	117.353	138.287	55.0447	108.76	60.3166	49.5583	124.558	45.9262	65.7784	131.421	65.7318	84.186	87.8719	32.4801	57.0106	50.8553	54.348	101.49	52.2023	111.749	158.384	73.0642	56.5349	84.6383	99.8549	86.9101	65.6352	54.6357	39.398
ESI-	102.03	1.424	HMDB0001259	Succinic acid semialdehyde	C4H6O3	102.032	14	39.2339	21.4882	16.2593	23.3026	20.5409	38.7039	36.1525	15.8597	12.3134	37.113	40.654	23.4757	30.7381	40.9824	173.153	17.4875	29.5121	18.5011	21.1023	59.1402	11.5462	28.4014	35.6108	25.0127	14.7003	32.2346	18.3676	23.7102	18.7098	17.8016	16.6636	24.4466	18.4822	20.4581	16.3952	31.8558	17.1536	13.5519	59.9209	28.0128	15.4951	15.8655
ESI-	102.067	2.967	HMDB0000892	Valeric acid	C5H10O2	102.068	13	1.7378	1.59227	1.37723	0.293768	1.43324	1.75168	1.62132	1.75396	1.57295	1.60088	1.13803	1.37727	1.88447	0.205371	18.4027	1.34688	1.88499	1.8927	1.46936	1.58531	1.42669	1.44679	1.5162	1.56805	0.258688	0.375189	1.4546	0.3682	2.0144	1.59499	1.70887	0.202337	0.40453	1.10675	1.37244	1.24186	0.522594	1.52261	1.29855	1.34025	1.66738	0.308922
ESI-	104.01	0.954	HMDB0000691	Malonic acid	C3H4O4	104.011	12	189.296	188.625	501.59	166.62	176.131	208.946	172.596	253.624	56.0641	197.452	45.6779	42.1621	52.6721	34.2122	30.3797	106.944	76.1032	60.8651	108.394	38.2555	77.1362	47.351	129.41	42.6891	68.8415	88.5998	58.1865	47.7694	72.2779	31.7514	95.4093	71.9513	41.1367	89.0267	96.5487	40.4656	43.9144	59.1517	52.2151	75.8133	109.83	56.4058
ESI-	104.046	1.626	HMDB0000008	2-Hydroxybutyric acid	C4H8O3	104.047	13	531.158	640.038	622.858	600.012	625.657	596.065	510.307	592.953	611.609	536.31	1322.52	577.804	613.307	1425.2	2809.98	725.029	570.367	1079.7	500.611	387.996	398.569	880.582	250.524	475.676	659.326	655.973	724.095	356.388	697.333	266.804	1016.01	920.868	429.988	384.177	395.743	539.63	612.883	511.872	1026	549.613	514.999	350.601
ESI-	106.025	0.86	HMDB0000139	Glyceric acid	C3H6O4	106.027	12	1084.92	1356.65	604.293	1273.3	801.676	1050.09	563.397	932.774	747.893	1134.32	1179.15	735.032	690.979	1283.47	1049.4	1102.42	2027.91	1715.75	985.697	1594.8	1448.58	1219.83	652.019	521.754	1119.24	1064.57	1559.57	542.278	1072.69	487.801	930.624	876.144	1397.78	1204.18	691.038	549.611	525.625	954.315	1372.7	667.042	817.275	879.98
ESI-	112.015	1.246	HMDB0000617	2-Furoic acid	C5H4O3	112.016	12	129.762	150.977	127.94	135.088	123.198	108.032	176.861	120.054	147.889	133.757	173.618	154.194	189.863	106.185	117.101	188.817	81.3796	112.851	168.089	202.988	139.297	175.404	191.278	116.569	127.252	130.13	175.595	93.4643	97.3752	125.922	290.895	124.561	168.674	109.397	132.817	87.8382	80.8757	144.808	134.004	100.224	108.965	141.908
ESI-	113.992	0.715	HMDB0014118	Trifluoroacetic acid	C2HF3O2	113.993	12	4905.68	5101.47	4989.15	4916.28	4631.8	4822.33	5116.28	4724.8	5015.32	4447.14	4446.2	5175.57	4086.04	4700.5	4554.33	4483.1	6507.11	5048.82	4730.8	5969.33	4394.6	5765.9	4998.42	4626.32	4805.22	4476.44	4989.42	5962.64	6038.04	4833.76	5392.85	4899.25	5370.66	5574.81	5712.49	5093.87	5190.3	4921.98	4924.17	5334.56	4972.72	5067.61
ESI-	114.103	3.799	HMDB0003671	2-Heptanone	C7H14O	114.104	11	7.62969	7.50744	6.82871	7.17397	7.36998	6.77002	7.08373	7.33741	0.267025	7.15441	0.235329	0.273779	0.439586	0.279104	264.331	0.239973	0.336243	0.372263	0.263203	0.303092	0.251629	0.293871	0.269088	0.252486	0.327382	0.252497	0.257141	0.847388	0.273686	0.766713	0.258538	0.234585	0.256285	0.252249	0.257661	0.240757	0.270118	0.23055	0.477906	0.251479	0.243515	0.253888
ESI-	116.01	0.814	HMDB0000134	Fumaric acid	C4H4O4	116.011	9	2100.82	1915.05	1615.13	1822.9	1502.2	282.179	1581.43	1408.75	2687.17	1460.58	1010.91	416.435	358.293	459.375	689.1	740.037	147.685	1269.87	223.835	99.2998	486.234	1858	1061.9	1675.9	316.887	2681.01	821.561	3968.38	719.657	2257.72	1577.47	1119.74	832.674	582.184	1161.3	2328.27	1672.65	788.731	191.151	2916.48	1604.66	100.166
ESI-	116.046	1.773	HMDB0000019	alpha-Ketoisovaleric acid	C5H8O3	116.047	11	212.356	229.457	236.385	203.655	224.561	227.064	269.666	250.75	229.069	178.871	661.573	392.563	585.464	505.472	958.429	68.4986	54.8938	113.574	113.384	55.667	45.5044	127.771	183.095	384.194	99.9191	108.087	97.8451	58.7677	209.018	475.152	75.9139	618.477	89.5768	28.0127	204.006	542.722	22.2381	82.8565	320.82	182.184	82.08	53.2481
ESI-	116.082	14.54	HMDB0000535	Caproic acid	C6H12O2	116.084	11	15.1928	14.8115	13.256	17.7784	23.5263	24.6854	16.9718	15.1854	14.5218	17.6555	13.5205	17.7593	14.248	17.95	12.7399	14.9201	21.0648	17.5149	15.2018	16.4375	19.2401	21.9679	20.8231	11.8324	14.1423	14.7241	17.5995	22.8017	23.4644	19.6	21.4286	10.6156	20.6032	17.6309	14.464	17.7022	18.9415	18.8428	18.9695	16.7709	20.8806	15.5778
ESI-	118.025	0.824	HMDB0000254	Succinic acid	C4H6O4	118.027	11	137.15	130.251	123.022	112.029	124.279	109.393	125.345	105.687	151.682	128.396	70.9477	75.3243	104.982	71.7445	65.2352	168.078	135.303	126.003	138.361	106.413	114.471	138.528	139.572	106.505	104.052	131.299	160.374	101.429	134.265	100.446	186.792	142.938	137.295	144.293	121.114	89.3554	118.348	122.961	136.157	138.494	136.656	149.766
ESI-	118.062	1.937	HMDB0001863	2-Hydroxyvaleric acid	C5H10O3	118.063	11	1827.12	1822.08	1772.72	1529.67	1695.04	1535.14	1671.42	1170.46	784.414	1115.62	1975.5	1814.14	2546.23	1292.14	2705.46	1370.94	87.2218	491.461	697.35	690.842	640.762	331.855	727.047	1006.87	602.083	1840.36	869.443	1006.84	416.871	953.611	760.875	1267.26	489.426	709.036	1201.42	1528.5	629.142	2227.41	2372.96	931.451	1190.27	565.608
ESI-	120.041	0.8	HMDB0000360	2,4-Dihydroxybutanoic acid	C4H8O4	120.042	10	777.435	824.044	907.222	987.929	756.31	830.114	892.401	958.61	991.448	634.077	702.583	1091.73	722.168	579.293	594.721	946.667	1314.78	676.584	932.462	1065.94	1088.79	691.588	975.81	999.757	1043.81	821.008	1217.36	569.179	657.713	769.783	932.968	822.83	956.433	806.629	873.989	697.251	617.589	587.487	1540.53	696.962	803.686	1252.8
ESI-	122.036	2.71	HMDB0001870	Benzoic acid	C7H6O2	122.037	10	53.3854	53.6594	5.31992	56.5189	6.24159	2.2663	55.2079	56.267	61.8322	3.37199	4.02539	57.7353	53.8918	5.48214	3.61326	3.7663	61.999	57.5392	54.7353	67.6509	2.62029	60.5891	5.12475	55.6659	54.7399	50.6266	60.8832	62.7885	74.303	3.77282	66.1273	3.10813	62.4638	56.2745	59.3	54.3862	60.0728	5.12916	7.05498	2.71796	59.4201	61.3083
ESI-	125.997	0.829	HMDB0003903	2-Hydroxyethanesulfonate	C2H6O4S	125.999	10	133.935	280.09	136.255	265.912	265.464	165.626	237.501	282.503	356.8	227.803	131.335	276.635	180.543	207.011	107.665	479.876	248.61	136.767	380.262	404.856	343.58	246.082	253.128	195.363	341.443	339.621	462.11	212.096	309.679	101.506	217.911	190.934	264.891	321.719	300.273	175.283	252.977	198.33	322.09	160.765	177.53	229.699
ESI-	126.022	4.026	HMDB0059882	Benzyl chloride	C7H7Cl	126.024	10	18.4343	18.9752	18.4154	17.544	21.1813	21.2176	22.3638	22.6016	23.0085	18.3282	17.9922	24.1567	16.9108	20.1196	15.5287	20.9046	30.4486	21.9116	20.0657	20.1102	18.341	23.2507	20.0241	22.0782	24.1773	22.3952	16.8718	21.543	26.7156	20.968	26.7562	18.8962	26.6098	22.6281	19.3899	19.6881	14.2695	19.6122	13.9602	17.389	15.6087	12.7324
ESI-	128.058	0.795	HMDB0000079	Dihydrothymine	C5H8N2O2	128.059	8	10.6301	11.9097	14.0011	18.3713	11.0899	13.3858	8.33827	12.937	12.6792	11.3678	7.32394	13.4619	12.747	12.4913	9.79937	12.6847	20.1334	10.1839	14.9621	11.916	16.2146	9.20264	14.4369	9.55089	14.3448	12.1301	13.5622	7.52094	12.4408	9.69947	35.7481	24.1288	9.99172	11.8843	17.4523	6.97725	6.67376	11.6017	8.1197	9.85287	11.8582	13.0762
ESI-	129.041	0.825	HMDB0000267	Pyroglutamic acid	C5H7NO3	129.043	10	653.271	676.53	645.283	643.007	622.812	623.795	633.21	592.222	610.776	654.536	540.518	717.249	733.081	490.841	531.487	688.432	373.4	598.532	955.763	1040.02	888.303	442.932	949.34	628.229	821.234	558.903	921.885	503.604	542.284	639.806	806.225	574.997	777.193	668.054	795.89	538.183	525.57	692.43	838.638	823.307	513.188	825.87
ESI-	130.025	0.817	HMDB0002092	Itaconic acid	C5H6O4	130.027	9	2995.1	2714.73	2397.06	2662.13	2228.8	1481.47	2311.73	2172.45	3903.74	2246.58	1685.78	1376.81	1358.01	1059.02	1187.46	1609.4	782.032	2120.45	1237.34	1213.53	1673.37	2492.39	1690.91	2281.51	1280.56	3696.86	1628.87	4536.6	4225.78	2917.92	2583.37	1717.03	1807.85	1242.56	2156	2808.71	2110.72	1307.8	1450.47	3573.27	2288.87	1184.38
ESI-	130.062	2.382	HMDB0000491	3-Methyl-2-oxovaleric acid	C6H10O3	130.063	9	601.792	922.802	594.386	572.813	688.447	572.669	570.329	560.821	508.389	536.055	1705.03	929.011	1685.97	1210.78	2012.7	373.968	171.758	314.462	502.302	148.628	547.755	375.224	541.105	921.403	315.462	442.08	423.415	222.352	395.238	1387.22	428.252	1415.52	436.746	135.407	642.187	1099.35	155.591	433.014	1187.44	560.327	391.259	362.322
ESI-	131.057	0.845	HMDB0001149	5-Aminolevulinic acid	C5H9NO3	131.058	10	85.545	77.8154	78.2941	76.1579	81.8528	68.2079	70.8654	68.1429	139.414	76.9595	62.0097	87.7866	79.7971	59.3544	51.0299	73.9783	40.0631	72.5321	115.903	82.1437	109.916	30.658	79.0209	94.7264	109.859	130.982	101.292	52.1213	43.1561	73.7732	82.0958	61.9822	84.1037	85.9127	82.0556	52.1123	85.079	49.8576	68.75	107.534	65.7032	78.1857
ESI-	131.093	1.38	HMDB0000687	L-Leucine	C6H13NO2	131.095	10	69.3092	53.6998	53.6517	61.4409	34.9182	34.706	50.0088	69.2901	49.853	63.8573	100.431	13.7093	49.7842	63.7919	135.527	67.3028	56.1379	95.3075	40.6239	40.3222	69.0003	26.9327	94.6529	71.8264	35.2976	55.0371	78.2732	65.5887	45.8742	63.9924	54.2273	11.3554	58.4213	42.3238	69.4078	11.1696	46.2224	52.2699	93.132	56.5029	51.1517	48.8257
ESI-	132.041	0.949	HMDB0000622	Ethylmalonic acid	C5H8O4	132.042	10	67.8451	102.293	101.498	130.086	73.5418	66.8898	93.919	121.605	80.6722	59.5119	57.3021	86.2458	58.6347	25.5197	38.3663	72.3421	54.6936	32.4722	109.532	96.413	96.5058	19.0009	142.86	101.016	120.115	64.6433	163.725	38.7439	39.3266	101.673	94.2718	92.2098	97.6116	91.6847	76.6923	98.279	34.7149	75.8147	164.144	66.1423	82.8159	122.688
ESI-	132.077	2.586	HMDB0000317	2-Hydroxy-3-methylpentanoic acid	C6H12O3	132.079	9	186.702	187.582	184.385	179.138	185.761	180.772	188.191	186.886	219.991	179.539	254.968	132.192	344.95	192.78	448.965	201.652	54.7214	148.456	169.143	157.377	217.256	88.0346	218.621	177.18	112.311	197.185	200.568	155.732	93.6077	179.256	176.212	175.941	145.129	148.747	147.609	175.131	109.568	205.277	270.742	188.186	125.19	123.882
ESI-	134.02	1.247	HMDB0000744	Malic acid	C4H6O5	134.022	10	29.6201	24.779	31.3063	25.0601	24.0437	26.4944	23.5635	25.8489	37.9433	26.0177	44.9676	15.9527	18.6493	21.7956	17.6763	26.4591	15.7428	28.3109	22.84	15.524	32.6655	32.5732	34.6062	18.548	20.0797	31.5705	27.8001	24.9716	31.9885	16.4258	26.9837	18.0576	19.2903	18.4934	22.3709	13.3708	22.3501	23.0148	17.3871	28.0457	36.9082	20.5458
ESI-	134.057	0.819	HMDB0000421	2,3-Dihydroxyvaleric acid	C5H10O4	134.058	9	346.648	313.644	100.402	156.095	364.48	364.61	448.016	124.418	140.252	92.9578	298.792	463.594	334.924	74.9311	261.917	392.639	328.087	72.0529	453.752	491.872	188.056	123.163	124.729	130.03	171.489	159.816	219.143	56.7735	131.608	90.18	151.289	402.646	115.085	141.253	108.486	92.3859	74.0436	127.304	698.797	321.392	371.106	131.655
ESI-	136.036	0.887	HMDB0000613	Erythronic acid	C4H8O5	136.037	9	1715.03	1323.47	3690.88	1571.25	1411.38	4100.7	4107.89	1478.61	2688.48	3969.2	695.977	1141.5	1044.29	976.362	556.986	1950.97	5088.63	1279.76	2014.25	1926.76	1811.36	1208.73	3609.42	2451.78	2009.32	2263.55	4897.29	1431.83	5119.63	1046.92	4755.22	3567.83	2573.91	5142.81	1393.22	846.15	1559.61	1450.16	2161.48	4558.99	2068.47	2489.15
ESI-	137.047	2.793	HMDB0015687	Salicylamide	C7H7NO2	137.048	9	171.025	185.948	193.574	184.158	176.423	194.064	192.077	196.411	5.82036	175.768	1.45967	3.23775	109.224	153.498	69.9497	209.589	19.0018	4.16349	5.20585	7.74074	3.94936	2.9289	151.18	8.40152	5.65149	4.2417	42.185	49.7371	36.3505	179.496	14.4647	3617.15	28.58	8.28274	11.7533	2.77195	47.0412	20.225	137.617	36.9425	58.8879	191.531
ESI-	137.904	10.938	HMDB0004142	Barium	Ba	137.905	6	50.8153	57.1154	24.033	66.4605	56.1188	23.2773	15.3027	80.1421	55.7983	66.9346	67.7935	68.9739	45.2899	46.568	76.0732	62.4328	42.5943	67.6517	70.289	43.7929	40.1432	56.714	49.984	27.268	40.0527	79.3549	16.8681	21.2135	108.649	94.9984	112.171	44.1318	89.737	87.1633	15.4749	75.4403	96.2873	24.0063	46.1656	85.3607	86.897	116.784
ESI-	138.031	2.319	HMDB0000500	4-Hydroxybenzoic acid	C7H6O3	138.032	7	132.056	139.72	134.319	131.134	121.454	130.845	148.823	139.457	20.7512	146.553	38.9922	32.8993	16.7758	13.7927	13.9578	11.6706	46.9254	8.5134	22.0444	12.8221	168.069	10.6712	20.4868	83.7406	283.418	18.5801	9.94729	8.06076	10.8002	72.76	36.7926	218.762	190.847	6.88507	30.131	181.194	139.075	78.3368	45.677	306.973	75.7553	79.9293
ESI-	144.041	0.776	HMDB0000393	3-Hexenedioic acid	C6H8O4	144.042	8	27.5602	41.7664	44.0742	39.1186	36.4477	34.0525	36.4503	49.9175	41.2447	26.4186	22.2746	43.0032	21.5434	11.859	19.9625	33.6316	38.2578	12.0948	43.3344	45.9402	30.2982	14.8864	52.1492	51.6425	49.2006	32.6157	58.3385	28.7931	21.9622	36.4469	63.3674	46.4009	41.6052	48.6569	38.2817	41.0677	44.5601	28.1334	113.827	41.3199	37.9708	58.2926
ESI-	144.114	5.436	HMDB0031230	2-Ethylhexanoic acid	C8H16O2	144.115	9	16.8114	17.2263	18.7031	17.5184	18.6809	19.6529	20.3849	14.7023	25.409	16.3699	22.5988	6.41853	9.36594	23.1961	441.823	5.02879	12.6637	7.11866	23.4988	3.5799	6.11773	11.1121	22.6913	28.1185	23.4496	22.4094	4.43063	6.02604	25.5788	23.4342	23.3315	18.9509	2.741	17.8366	19.5627	19.7621	5.1351	5.84184	19.4809	22.6607	24.7373	20.628
ESI-	145.036	0.813	HMDB0001552	2-Keto-glutaramic acid	C5H7NO4	145.038	8	32.8575	31.2379	35.7174	29.0581	30.9307	25.7785	29.3519	27.4171	55.3623	26.5298	18.4942	44.4691	27.7319	29.1071	13.5819	43.0846	52.2897	33.4634	59.096	40.1545	70.99	22.5425	31.2191	42.9198	55.2303	52.5195	28.5406	18.3509	18.479	24.1963	25.3047	25.4546	34.2027	34.4087	32.1667	14.6801	30.7978	27.3327	17.3775	35.3865	21.8877	30.6248
ESI-	146.021	0.819	HMDB0000208	Oxoglutaric acid	C5H6O5	146.022	7	8283.25	8734.55	8120.59	8492.68	7877.48	8161.13	7366.56	7704.52	9549.02	7213.3	9381.68	6763.41	9286.3	5946.62	5877.05	9515.6	3989.98	8819.82	8546.72	8954.54	7228.48	9051.73	10624.4	6476.59	6155.94	7986.2	8504.83	7223.11	8236.3	8809.74	9995.48	7421.26	8974.43	6756.4	7378.53	6161.93	6430.21	8815.78	7117.53	7263.02	7078.6	9507.8
ESI-	146.057	1.966	HMDB0000448	Adipic acid	C6H10O4	146.058	8	62.7025	64.8669	62.5144	69.0212	60.8615	59.3834	59.6214	62.3979	58.2466	56.693	19.2476	28.159	65.0483	96.3752	114.99	38.4551	102.255	43.5614	32.6297	101.671	24.7327	56.2249	120.463	50.0638	68.2752	53.3574	20.0228	37.6002	36.8734	39.7764	88.477	40.9083	95.3792	141.098	50.9178	38.3094	63.4761	81.1271	60.1369	49.6958	35.4095	27.7535
ESI-	146.068	0.878	HMDB0000641	L-Glutamine	C5H10N2O3	146.069	8	1207.58	1239.38	1143.58	1223.17	1208.23	1152.43	1192.97	1248.34	1136.97	1061.05	828.926	1053.74	1115.33	1099.26	341.273	1305.86	1039.66	1401.56	1442.92	1361.49	1388.74	872.786	1494.92	1199.33	1223.04	1025.28	1397.47	1214.33	2214.32	1265.42	1481.73	1129.9	1667.69	1307.72	1295.44	1140.24	1105.27	1368.34	1317.86	1413.26	1126.41	1429.51
ESI-	146.093	3.33	HMDB0036231	Methyl DL-Leucate	C7H14O3	146.094	8	21.5485	24.2921	33.8602	23.9511	23.4154	23.2007	25.2202	24.1195	21.4161	21.1571	17.0907	13.9764	21.4889	22.5495	16.7265	20.2326	20.7713	19.0518	26.6852	24.5841	25.2379	20.6433	27.713	21.0325	24.5342	17.2117	19.1039	18.7324	16.5297	16.1795	46.3328	20.3113	25.5988	26.6231	23.8235	14.7549	21.5875	18.9619	21.3457	16.7251	19.0089	26.5766
ESI-	147.052	0.819	HMDB0000148	L-Glutamic acid	C5H9NO4	147.053	8	746.234	771.55	716.618	713.437	702.13	596.117	726.346	676.701	763.47	738.401	615.764	849.007	829.462	638.357	558.594	763.113	503.52	67.1667	1055.52	1171.11	1049.63	454.517	1057.71	739.102	1003.67	697.69	1009.5	565.745	622.653	697.481	876.033	627.513	869.779	777.139	898.264	585.257	565.059	746.61	946.149	911.189	579.16	929.34
ESI-	148.036	0.814	HMDB0059655	2-Hydroxyglutarate	C5H8O5	148.037	8	417.948	301.597	370.183	391.883	274.698	265.313	282.375	258.237	442.533	337.557	329.193	248.872	410.891	189.817	197.108	297.425	352.476	283.995	336.881	359.039	261.679	334.531	267.217	319.713	258.414	372.139	187.579	381.093	361.701	269.884	375.821	284.882	404.662	169.569	382.752	209.002	245.695	208.182	498.962	262.486	357.903	400.721
ESI-	148.073	0.826	HMDB0000227	Mevalonic acid	C6H12O4	148.074	7	73.8953	45.579	81.5866	76.8689	35.1284	74.1782	39.628	69.0805	93.614	45.6411	40.4315	33.2741	82.2695	64.0926	49.4262	69.6384	42.4381	66.4716	88.6857	26.7266	88.518	28.0862	77.1093	54.6006	88.9852	55.5313	88.7127	33.7951	29.1358	79.2525	54.4632	34.0723	95.2782	90.1125	85.8447	57.2144	69.4676	40.4189	80.5412	74.2637	70.4151	63.7996
ESI-	150.015	0.979	HMDB0000956	Tartaric acid	C4H6O6	150.016	8	132.04	164.998	115.156	160.628	148.256	138.203	156.399	219.566	37.5032	123.089	26.4078	25.4225	21.0352	15.8933	23.4648	28.8258	16.9024	24.512	64.3301	54.278	15.1122	43.2298	32.3056	19.1802	50.7308	27.49	14.066	22.1287	41.2815	13.1823	59.6112	70.6587	31.6934	14.2065	46.2289	15.0526	18.9337	14.3262	42.091	43.342	18.6824	68.1004
ESI-	150.052	0.808	HMDB0000751	L-Xylulose	C5H10O5	150.053	7	212.024	231.645	200.474	237.056	193.992	162.639	169.168	202.308	193.225	161.807	109.469	194.318	178.576	150.932	109.862	155.825	218.168	205.271	188.296	161.677	284.582	106.429	207.711	196.795	185.208	156.94	292.898	105.275	144.212	204.33	178.966	163.352	200.899	200.184	189.316	144.156	131.878	161.356	286.591	163.132	131.54	183.658
ESI-	151.062	1.962	HMDB0001859	Acetaminophen	C8H9NO2	151.063	8	0.838545	0.827689	0.880433	0.863091	0.887521	0.821614	1.13467	0.916724	0.83228	0.761705	0.804891	0.838893	68.0549	0.851434	0.773174	0.785333	1.45162	0.888644	0.850317	0.949268	0.796635	0.964844	0.792025	0.833142	0.858573	0.829172	0.685788	0.927891	0.951577	0.76263	0.850198	0.988565	0.865974	0.874765	0.85928	0.786979	0.708235	0.738386	0.940286	0.733166	0.673081	0.812091
ESI-	152.032	1.246	HMDB0000292	Xanthine	C5H4N4O2	152.033	8	70.7593	69.7752	70.2901	66.1301	65.4073	60.6469	76.9496	72.8014	85.5494	65.4271	63.5763	77.2321	77.468	128.735	76.0183	79.7925	55.0767	49.6353	122.694	82.4721	85.213	65.199	50.8435	62.8388	103.752	73.5723	73.7707	46.7032	50.0126	75.8354	82.9285	47.583	59.6402	72.2992	62.9679	41.3042	71.2226	44.8967	65.206	83.5723	71.9109	58.778
ESI-	152.046	10.503	HMDB0031609	Phenoxyacetic acid	C8H8O3	152.047	8	5.85227	6.23826	5.88429	5.7888	8.23973	7.63132	8.09671	7.53339	6.7207	6.65176	7.53978	17.1914	5.87788	8.28918	3.54959	10.3933	7.71784	2.88107	16.4042	25.2497	7.69374	7.37522	13.7215	7.91123	18.3568	5.25167	4.62436	1.91117	10.628	4.07107	12.9693	14.5952	13.514	9.66756	10.4959	4.15704	4.63639	2.48243	17.8908	11.1555	5.09584	15.0199
ESI-	154.039	0.894	HMDB0012209	Diethylphosphate	C4H11O4P	154.039	4	549.303	1057.71	858.001	1336.24	925.967	670.832	1014.4	843.928	682.963	987.433	614.121	2469.41	1116.47	1319.01	661.685	802.615	646.927	1059.32	1715.1	1672.39	992.636	732.18	1339.93	845.128	536.622	953.433	2331.13	971.646	390.91	1685.37	736.303	2186.59	1001.81	951.337	839.061	403.687	1294.89	1448.26	155.252	1181.5	463.681	791.095
ESI-	155.98	14.571	HMDB0000816	Phosphoglycolic acid	C2H5O6P	155.982	13	926.545	950.984	938.726	940.154	917.478	904.729	913.732	824.767	867.316	568.629	778.313	989.775	827.795	898.671	864.15	852.967	1051.77	891.747	899.034	1038.98	830.059	1025.54	933.997	869.039	888.022	785.682	1007.07	1081.6	1106	946.078	1001.59	864.25	986.645	930.413	1033.99	992.655	1022.01	895.057	905.319	1023.37	967.688	1040.88
ESI-	156.018	0.916	HMDB0000226	Orotic acid	C5H4N2O4	156.017	7	39456.9	40191.7	17535.9	40850.2	36656.7	38483	38773.7	25252	41422.5	37866.3	22769.9	42702.3	45073.8	34857.8	30858.7	37935.9	29676.3	30612.6	45604.7	23211.2	36629.7	30287.6	38349.9	40843.7	45895.5	39120.2	36757.7	29966.5	24315.7	46787.8	39669	38945.2	44838.2	32390	24971	39392.6	40741.8	43751.2	74752.1	39106	37174.2	50110.3
ESI-	156.041	2.352	HMDB0029610	Ascladiol	C7H8O4	156.042	7	54.1573	39.8014	33.8306	39.4512	33.1348	32.3337	40.4016	37.0829	24.6491	46.9508	72.8624	22.6466	74.7479	48.5778	32.4679	18.3254	64.6322	30.4779	28.0619	28.663	46.6575	38.0125	44.4246	14.0579	11.5462	22.9676	40.0864	19.3083	26.0002	37.4507	27.655	15.0956	29.479	29.3052	29.7112	145.984	37.8568	71.6405	57.1736	32.5018	35.0849	18.3471
ESI-	158.033	0.844	HMDB0003349	L-Dihydroorotic acid	C5H6N2O4	158.033	1	627.608	534.316	663.481	669.778	551.033	637.667	644.506	655.869	641.599	678.352	21599.6	548.736	658.133	613.626	588.125	336.843	435.251	245.474	496.322	832.746	660.408	606.799	647.172	493.36	675.474	610.856	655.412	321.307	340.282	491.831	565.123	337.42	641.246	503.637	398.484	340.766	429.206	524.685	1586.17	485.705	412.309	608.217
ESI-	159.089	2.104	HMDB0011757	N-Acetylvaline	C7H13NO3	159.09	6	27.5104	26.1279	29.5018	26.2742	28.6537	28.6299	27.0927	27.4879	52.6805	25.0614	25.0507	34.8028	28.4432	28.0541	19.8086	32.5489	24.3632	35.4639	34.7154	33.2274	41.5821	22.5916	33.1493	31.1309	37.0309	50.8075	33.5034	21.533	30.7748	19.9562	24.553	18.8205	30.7309	29.624	32.179	19.1864	28.9502	16.9103	28.4876	34.1903	27.1517	22.6997
ESI-	160.036	0.83	HMDB0000225	Oxoadipic acid	C6H8O5	160.037	5	87.0756	100.223	86.4902	82.1473	81.9332	90.6509	83.4525	98.6669	120.293	81.5681	84.5247	60.3706	84.1578	69.2427	176.466	104.027	26.5486	137.451	63.7872	54.0134	92.0444	89.3836	79.8445	92.8486	72.3869	110.069	90.1952	69.0242	95.6805	86.6236	70.2711	49.7263	81.5228	73.8768	67.298	57.9685	80.11	99.3219	111.622	90.8605	92.6897	50.6965
ESI-	160.073	2.3	HMDB0029167	2-Methyladipic acid	C7H12O4	160.074	6	21.6176	20.345	22.2661	22.2552	23.2319	21.6675	24.2318	26.595	14.7257	23.4585	7.039	6.05631	9.43631	21.8409	17.968	5.64044	26.1737	8.38294	6.54709	7.78805	9.57262	7.76961	5.0961	5.02529	13.2508	10.8822	3.89579	6.72365	19.4841	8.47363	12.9766	9.03208	13.392	14.763	12.8363	4.67554	5.66137	9.1895	11.2728	9.68661	4.17966	5.41264
ESI-	160.109	2.874	HMDB0002264	(R)-2-Hydroxycaprylic acid	C8H16O3	160.11	7	46.6274	45.1483	44.2461	53.9653	42.1009	60.6085	52.9865	43.1443	4.52994	42.455	3.94529	3.48585	4.04332	5.48508	1629.46	3.82229	13.0804	3.58626	16.1357	4.44435	4.65256	19.6202	5.19775	3.21594	20.1189	4.23003	3.13599	19.918	3.17345	3.2547	23.7924	3.04575	23.3685	23.5413	3.39655	19.6006	3.6589	3.16024	18.8261	3.15504	3.11659	3.83718
ESI-	160.125	6.804	HMDB0002038	N(6)-Methyllysine	C7H16N2O2	160.121	22	0.576851	0.528863	0.776865	0.517221	0.607415	0.573564	0.697854	0.569576	0.573892	0.684139	0.527438	0.582122	41.8343	0.566508	0.534931	0.530594	0.741054	0.531412	0.551606	0.662304	42.7164	0.676047	0.577374	0.532526	0.553851	0.503068	0.560886	0.594242	0.634716	0.537108	0.590049	0.525851	0.546128	0.547236	0.544151	0.527593	0.556163	0.505047	0.514571	0.540278	0.529575	0.586336
ESI-	162.015	0.819	HMDB0002070	4-Hydroxy-2-oxoglutaric acid	C5H6O6	162.016	6	189.376	184.691	163.249	189.043	172.644	173.773	161.454	150.39	238.36	166.312	151.822	81.0321	140.419	119.9	101.081	154.035	67.443	167.442	84.6252	55.3215	136.821	221.379	186.684	178.373	103.406	259.2	184.031	202.504	349.998	179.267	181.271	128.229	116.081	156.714	113.817	149.687	191.227	173.733	104.173	207.208	209.377	59.4191
ESI-	162.052	0.796	HMDB0000321	2-Hydroxyadipic acid	C6H10O5	162.053	7	38.0458	53.9153	61.8597	26.7374	72.5256	55.9725	40.9639	109.205	155.321	25.8978	56.7515	138.789	62.9684	30.2264	21.3047	99.785	27.9017	15.4113	113.121	68.1085	40.0939	55.1893	30.8744	88.2327	140.109	42.0623	33.4577	85.4395	90.8725	47.093	30.3299	75.9005	21.9582	20.8604	131.385	18.565	42.2969	106.499	98.3736	19.4128	47.9029	58.0458
ESI-	162.993	1.887	HMDB0033585	Acesulfame	C4H5NO4S	162.994	6	0.930654	0.918606	0.643688	0.656493	0.728947	0.662249	0.723476	0.678547	0.721497	0.757642	0.624504	0.93104	0.658449	0.930393	0.764324	0.677073	0.89328	0.986256	0.752113	1.36032	0.718435	1.07083	0.694825	0.672217	0.741744	0.678374	0.695084	0.718387	0.878985	0.8464	3.07991	0.7877	0.961096	0.970852	0.69295	0.873423	0.597619	0.819493	1.04357	0.8137	0.747015	0.623561
ESI-	163.026	2.061	HMDB0001890	Acetylcysteine	C5H9NO3S	163.03	27	2.13473	15.094	5.67573	6.62813	4.04788	5.05623	4.25213	17.629	5.39607	2.96678	13.3302	4.87146	1.45012	15.0337	11.5196	6.75059	16.162	4.70961	2.75456	18.6595	12.2321	7.74352	9.09757	24.3385	8.1649	6.21035	13.6999	10.6995	23.524	13.6224	16.3803	15.6473	15.2872	14.1189	8.76085	4.04889	17.0597	13.5402	13.8286	9.16973	15.5569	18.3888
ESI-	163.063	1.938	HMDB0062406	4-Oxo-1-(3-pyridyl)-1-butanone	C9H9NO2	163.063	5	3421.98	3471.68	3489.81	3342.61	3400.53	3331.67	3561.67	3273.06	3566.15	3485.96	3230.85	3920.76	3059.1	4213.38	2999.74	3269.54	8186.02	4944.27	3046.84	3763.1	3137.49	5416.77	3178.54	3286.44	3418.18	3462.32	2521.6	3795.55	4742.6	3451.25	3802.2	2996.04	3687	3513.45	3426.35	3210.42	2569.36	3564.07	2513.04	2476.15	2756.34	2999.69
ESI-	164.068	0.814	HMDB0002712	1,5-Anhydrosorbitol	C6H12O5	164.068	5	578.656	558.23	894.264	946.662	521.767	693.434	1034.3	384.578	693.831	1008.48	305.334	789.231	1157.67	667.68	679.19	346.006	656.042	1087.25	1112.36	688.033	726.169	744.975	806.163	874.535	556.65	491.331	1174.07	430.817	387.352	687.754	313.587	1224.84	491.297	486.444	349.272	408.774	504.565	606.51	165.745	1226.42	424.481	758.852
ESI-	165.042	1.871	HMDB0004089	Formylanthranilic acid	C8H7NO3	165.043	6	10.9977	10.2913	12.3487	12.7043	11.1078	10.5996	12.5514	10.719	9.1054	12.9274	6.14757	18.6616	14.953	14.1868	16.8482	10.1255	3.86857	8.78826	10.9068	16.2805	13.6361	9.86365	27.8348	11.5955	9.84211	8.95852	9.94458	10.6185	9.65026	5.87793	10.1279	11.3858	9.36279	9.08491	9.30551	11.157	11.2743	8.83828	9.36453	11.8084	10.8024	22.2932
ESI-	165.078	1.673	HMDB0000159	L-Phenylalanine	C9H11NO2	165.079	6	241.988	275.192	289.91	268.175	259.511	285.261	294.876	290.957	268.997	276.682	263.356	261.801	453.671	314.286	326.192	283.911	179.157	343.362	316.805	337.446	385.368	174.992	449.301	306.231	345.847	228.914	405.481	228.111	253.452	300.842	292.77	227.781	298.708	261.44	296.143	285.436	276.793	314.402	314.444	229.882	215.29	353.207
ESI-	166.027	11.674	HMDB0002428	Terephthalic acid	C8H6O4	166.027	1	109.051	126.868	129.1	242.413	232.926	193.624	109.04	109.557	109.819	105.465	94.0605	98.2752	106.78	112.815	108.412	82.6334	141.753	104.929	93.352	130.701	103.057	128.309	307.349	109.26	112.042	100.105	121.398	196.92	177.286	135.357	369.007	149.421	247.475	116.773	143.851	242.798	190.664	154.936	155.085	139.122	143.471	147.979
ESI-	166.047	0.875	HMDB0060256	Xylonic acid	C5H10O6	166.048	7	432.985	484.049	429	308.558	225.481	502.757	434.702	251.939	608.341	399.339	505.389	740.121	175.427	584.091	354.624	384.433	813.308	588.323	535.788	754.216	542.15	413.362	477.961	438.754	279.066	543.791	384.574	452.744	407.061	335.414	475.696	233.74	259.67	283.461	647.896	431.685	251.89	193.292	367.791	428.279	549.505	682.004
ESI-	166.062	2.838	HMDB0002199	Desaminotyrosine	C9H10O3	166.063	6	18.804	19.3912	19.853	20.7424	18.2809	21.0889	19.5582	21.0126	18.2509	20.1735	25.5307	12.8952	84.8989	42.2415	34.2047	18.4886	12.3816	16.9751	22.3924	27.8372	23.4471	8.90974	17.4662	13.3378	17.1927	22.249	19.754	6.75861	7.01985	26.8797	20.0204	13.2989	16.1521	12.079	16.2462	14.9172	21.1054	11.0895	19.4195	22.2266	19.3412	17.2989
ESI-	167.045	8.66	HMDB0002032	8-Hydroxyguanine	C5H5N5O2	167.044	4	4.36753	4.25579	4.44604	5.28471	4.88164	3.90862	4.92327	4.43789	5.01698	4.5282	4.28027	8.30034	3.43875	3.49431	6.48964	5.24102	3.86984	2.72453	7.81764	11.4779	4.62884	3.92524	6.65884	4.64086	11.7552	4.72641	2.50771	2.44502	3.08263	2.82126	6.72546	6.66135	6.41157	3.03704	4.53733	2.52969	3.39979	3.11723	6.66004	4.66935	3.09177	8.56471
ESI-	168.027	1.244	HMDB0000289	Uric acid	C5H4N4O3	168.028	6	441.635	414.469	474.657	452.519	429.285	417.559	409.698	423.758	279.1	417.081	751.667	425.078	1189.48	717.917	658.042	403.288	381.956	730.723	521.191	331.126	784.257	338.277	438.526	388.555	382.374	231.543	408.195	207.636	247.295	403.972	615.22	295.493	357.933	281.635	313.157	175.004	353.395	400.428	495.883	512.928	248.671	286.118
ESI-	168.041	3.905	HMDB0001336	3,4-Dihydroxybenzeneacetic acid	C8H8O4	168.042	6	8.41624	7.82865	7.8116	7.55104	6.41662	7.74195	6.55867	5.16126	2.68862	5.07348	19.1908	2.09078	4.31152	0.816664	1.70878	6.46186	1.97701	0.402308	1.99535	6.91677	5.01117	8.33301	4.03953	4.1642	16.4498	2.49421	2.38504	0.49887	4.06942	2.60285	10.1369	1.81775	21.2443	1.74778	2.84413	1.79836	18.7516	3.31889	0.259314	34.2466	16.9164	4.9441
ESI-	172.049	0.822	HMDB0001892	Menadione	C11H8O2	172.052	1	591.65	509.555	638.376	620.435	533.787	614.824	619.479	633.935	605.018	649.971	21592	532.059	420.44	585.89	534.832	315.324	423.405	194.8	456.567	798.234	617.777	550.77	621.654	459.801	655.458	573.043	604.91	308.814	314.978	452.913	523.437	327.267	617.977	461.964	374.278	327.393	404.621	493.722	1496.31	454.398	397.108	564.692
ESI-	172.073	2.843	HMDB0000341	2-Octenedioic acid	C8H12O4	172.074	5	34.3422	31.7857	32.7921	35.5969	37.2072	34.6504	35.2028	33.8155	30.5847	33.8402	43.1694	30.237	49.5855	37.4411	51.7574	49.5729	65.6303	35.9097	31.2317	35.8541	30.8604	49.6345	36.0927	34.8544	30.2029	31.7019	27.5281	45.4467	46.9519	30.197	35.7813	38.8859	33.1732	23.3269	31.0323	28.5694	61.999	38.2112	51.1599	39.1422	36.7113	37.097
ESI-	172.109	3.633	HMDB0094711	9-Oxo-nonanoic acid	C9H16O3	172.11	5	53.833	55.9901	69.4335	60.3187	56.3021	58.2205	48.227	48.8211	117.671	49.2015	45.9183	55.7463	86.9156	48.2554	99.628	73.8139	107.693	26.027	117.548	50.4233	72.5991	40.9402	53.2837	37.2555	161.458	80.8994	38.1704	123.66	39.3819	77.3151	204.385	116.687	133.959	95.7605	111.91	103.585	81.7849	85.9373	66.9805	74.9683	108.861	60.7917
ESI-	172.145	10.505	HMDB0000511	Capric acid	C10H20O2	172.146	6	3.78838	6.47865	5.35395	5.72715	4.24665	5.12197	6.08755	5.85513	5.6344	5.69249	5.1381	21.8289	3.10906	9.78477	2.84082	9.65804	8.36204	8.04124	21.0648	26.6873	8.26968	14.2425	10.2375	6.31981	18.617	5.20382	5.75299	1.36661	6.87417	2.26267	12.151	10.9849	13.2592	2.07366	11.6282	2.86335	4.01681	6.85221	12.6122	9.10954	3.04201	14.8014
ESI-	173.104	2.141	HMDB0000701	Hexanoylglycine	C8H15NO3	173.105	5	17.5809	20.6397	19.8718	19.2669	19.3465	19.3591	17.7139	19.1363	2.69539	20.3106	2.51272	3.5926	3.38131	3.07358	4.07437	2.48756	7.69358	4.05906	2.58269	2.47403	1.95252	4.44397	2.1282	2.11958	2.20982	2.19317	2.25544	3.27664	4.75198	2.45359	3.00301	2.3629	3.55016	3.05866	2.65129	2.51222	3.41074	2.44107	2.34833	2.06069	2.48223	2.22117
ESI-	173.998	2.428	HMDB0060015	Phenol sulphate	C6H6O4S	173.999	5	89.5119	94.6936	90.0843	91.7846	84.466	82.7849	88.6537	85.8773	54.7428	87.7115	20.499	36.1106	76.592	76.086	104.452	43.9686	13.9122	228.118	244.108	57.6616	42.6081	87.5174	155.263	94.5635	100.32	49.2021	72.2271	84.2691	16.6945	52.7773	50.593	108.823	43.67	22.2677	20.4938	13.6684	22.017	27.1847	124.583	83.9609	19.2844	108.796
ESI-	174.016	0.82	HMDB0000072	cis-Aconitic acid	C6H6O6	174.016	5	436.919	416.552	413.103	441.675	416.112	412.874	354.837	368.374	458.731	368.807	405.04	299.812	524.276	213.63	275.609	371.093	347.976	431.738	449.949	435.849	350.602	372.858	431.887	415.472	312.931	480.764	352.787	474.68	621.068	474.054	438.258	402.056	435.427	270.394	322.722	378.659	423.106	280.593	465.651	493.524	334.724	460.469
ESI-	174.088	2.656	HMDB0000893	Suberic acid	C8H14O4	174.089	5	85.9816	66.2212	75.7766	95.5437	96.1055	72.6507	78.9818	74.3301	68.6028	70.9407	50.8068	44.9296	53.04	81.6885	128.568	63.9575	108.187	57.181	53.9268	83.6399	45.1412	66.5967	38.0446	45.1981	46.5957	62.8255	30.384	71.7061	75.421	47.0561	79.9915	50.3727	79.9928	109.467	73.0284	47.5495	57.4652	70.6159	45.203	54.8955	66.6719	60.042
ESI-	174.125	3.839	HMDB0031513	3-Hydroxynonanoic acid	C9H18O3	174.126	5	12.3511	12.8975	14.3416	11.7336	12.493	11.191	11.7013	15.753	12.5053	14.8978	9.04814	7.65605	11.2004	9.64843	11.8447	11.8445	11.8848	13.297	10.4287	11.7054	15.5305	13.5684	24.1492	13.3747	11.5509	14.8671	10.5648	12.745	13.6035	12.649	15.5089	10.6728	12.2008	13.7985	14.2096	9.87399	12.3316	14.3585	11.9476	12.8369	13.9102	14.2262
ESI-	176.031	1.242	HMDB0000044	Ascorbic acid	C6H8O6	176.032	6	330.203	325.731	319.593	310.539	285.632	271.8	268.501	320.091	575.044	262.71	238.571	76.1797	56.8985	67.8905	143.371	156.375	14.8118	193.054	26.2629	8.86048	81.5167	299.21	267.295	321.586	60.0289	497.075	173.314	622.058	654.209	391.483	314.152	208.146	146.682	103.874	195.577	395.664	335.925	124.671	25.4261	490.833	309.047	45.5613
ESI-	178.029	1.767	HMDB0031162	3,3'-Thiobispropanoic acid	C6H10O4S	178.03	5	12.0264	12.2212	12.0892	11.8471	13.166	12.9091	11.8334	11.1173	19.7901	11.9828	11.029	13.6037	22.0464	18.2061	11.1818	21.3092	13.7809	15.1037	25.094	17.7313	29.3713	6.0337	10.3046	19.0828	12.7817	14.6192	16.3741	6.42076	5.53096	13.7947	14.5	9.62378	10.6217	8.77286	15.6752	9.02392	9.80647	6.99085	17.2713	18.7721	13.5267	13.4044
ESI-	178.047	0.819	HMDB0000150	Gluconolactone	C6H10O6	178.048	1	199.871	206.661	195.406	199.558	179.318	191.608	164.053	149.968	207.619	181.653	173.018	92.4426	151.599	177.488	91.0486	173.942	44.5378	296.747	60.0129	55.1996	131.318	205.069	181.14	152.835	115.045	265.187	194.188	199.224	214.64	154.093	144.908	125.991	127.134	173.969	111.203	165.641	201.537	173.538	115.72	153.329	221.51	66.7024
ESI-	180.063	0.786	HMDB0001889	Theophylline	C7H8N4O2	180.065	4	21897	21737.8	23993.3	23947.9	37261.5	17154.9	17192.9	19311.1	28182.9	38301.3	14847.8	19703.1	21576.2	15848.7	13968.9	38502.4	30522.3	14719.3	27535.8	28509.1	37229.2	13920.5	24588.1	41711.8	25425	23453.9	37720.1	13386.2	24552.5	26237.8	40515.4	39673.4	24655.6	21010.8	18600.3	21651.2	21761.8	28277	36831.6	21634.7	22669.3	21957.2
ESI-	182.045	0.898	HMDB0003099	1-Methyluric acid	C6H6N4O3	182.044	5	53.1709	49.4383	39.6417	56.5921	48.1131	59.4696	55.5465	60.3996	61.1139	56.5122	16.9447	54.9056	55.9373	52.6856	53.0555	52.5802	40.2634	49.7256	74.7714	65.652	72.7057	43.8049	83.1096	67.1063	67.9389	53.5939	63.9612	59.9175	54.5727	63.9731	71.7553	35.1882	85.662	69.933	61.7496	56.8876	59.429	65.8165	52.6197	69.9017	56.5279	81.6191
ESI-	182.057	2.053	HMDB0000755	Hydroxyphenyllactic acid	C9H10O4	182.058	5	67.0714	54.7475	53.4037	41.1884	50.8924	53.9549	57.5887	52.9734	55.2189	57.9223	70.947	47.6395	151.077	86.8943	43.204	62.6256	56.3375	44.1672	148.732	78.5733	131.813	70.8807	39.9093	44.2982	64.6567	52.3886	68.6733	26.9511	32.954	55.6137	45.8809	42.8246	59.7341	38.225	53.8547	40.8626	64.6805	23.2537	55.6376	67.7277	41.5618	56.3979
ESI-	182.078	0.93	HMDB0000765	Mannitol	C6H14O6	182.079	2	206.418	575.454	179.859	193.458	591.88	367.71	281.348	276.955	303.924	693.436	8114.27	271.967	239.4	297.42	318.452	359.51	496.015	218.834	506.749	461.966	671.869	302.759	219.327	228.445	739.41	233.418	200.777	313.343	151.37	269.605	570.761	187.515	297.759	182.113	418.581	382.93	166.667	224.645	1677.77	290.46	233.179	317.833
ESI-	183.953	0.863	HMDB0001989	Tungsten	W	183.951	13	46.0947	51.1504	55.0849	63.2895	53.9602	52.1573	54.4453	51.564	49.6009	50.9598	58.9452	50.9194	49.4395	84.3366	127.242	50.209	15.045	25.7287	35.088	53.8688	40.6814	49.449	50.538	64.6253	63.627	43.894	41.6651	50.9425	43.5185	53.5638	54.4947	85.2356	63.2871	65.7874	66.9892	73.3646	36.6242	44.5566	39.0311	86.1916	76.945	48.6734
ESI-	184.036	2.783	HMDB0013198	4-O-Methylgallic acid	C8H8O5	184.037	5	330.975	309.487	375.938	376.207	363.037	349.774	388.891	372.893	34.8586	332.423	1153.36	83.445	550.532	167.514	84.7282	388.768	206.522	14.6649	54.6986	79.2456	620.612	514.095	120.218	270.206	384.848	38.7727	10.1226	46.9044	293.892	229.658	113.797	515.835	465.45	2.96565	41.6365	146.122	419.468	170.06	59.1414	886.103	155.248	207.835
ESI-	184.073	2.694	HMDB0001490	Vanylglycol	C9H12O4	184.074	5	18.9009	18.5712	21.576	19.1351	19.4462	32.4412	19.9259	17.6831	12.8876	20.1948	6.05076	15.9107	10.176	29.8082	54.8736	6.51506	2.37655	59.9583	5.75441	13.2545	4.30624	75.1549	12.4033	7.02169	5.30199	10.316	9.43919	68.6272	64.1999	3.21495	4.15232	3.77541	18.6652	15.0534	118.954	4.28732	31.8776	9.74234	17.1767	11.7635	9.79039	6.7579
ESI-	187.12	2.468	HMDB0013010	N-Heptanoylglycine	C9H17NO3	187.121	4	155.115	168.889	163.337	172.95	165.641	164.142	168.154	168.585	36.1028	164.099	30.2924	37.3656	44.2449	39.323	125.787	56.383	70.8488	34.2162	57.6401	45.5893	32.3689	36.0737	24.8284	29.2408	32.8291	32.1481	27.8291	77.7151	34.072	57.0068	57.2244	57.7038	86.9554	48.5621	63.5302	68.563	95.6122	54.4004	65.9182	37.7627	43.3822	42.4766
ESI-	188.014	2.933	HMDB0011635	p-Cresol sulfate	C7H8O4S	188.014	4	45.6562	44.3537	51.0396	50.6503	40.8345	45.4358	45.2707	45.3716	1.94167	43.0352	4.69923	51.323	73.5562	171.27	54.3681	12.4218	2.88111	66.8689	5.39661	7.58015	22.19	40.5601	197.418	22.8848	7.60443	1.80549	4.434	3.98771	71.3308	12.8753	105.893	1.76933	23.4343	4.37389	28.1159	3.34735	12.3656	5.58573	5.97484	5.883	3.16398	9.67004
ESI-	188.104	3.089	HMDB0000784	Azelaic acid	C9H16O4	188.105	4	212.281	218.086	220.886	232.68	222.514	215.403	236.08	225.476	219.609	226.086	187.204	154.819	305.895	172.547	333.278	236.079	346.993	139.994	288.174	195.134	152.26	181.005	123.249	138.738	248.678	201.122	97.3728	265.913	173.515	179.422	462.594	189.341	457.885	418.791	300.567	252.555	230.282	232.534	191.671	181.737	302.426	201.768
ESI-	188.14	3.751	HMDB0040329	5-Hydroxydecanoic acid	C10H20O3	188.141	4	6.31611	6.43127	7.75194	8.3862	5.88304	6.40169	4.72397	4.70354	5.57785	5.06459	3.7422	3.65381	3.7278	4.7227	15.622	6.40936	5.23788	4.19432	10.2368	4.98729	4.73474	4.45948	3.75924	3.68485	4.97699	5.23949	7.46741	7.11048	6.70607	4.99954	7.51958	6.87367	7.32133	7.76102	9.04557	6.66926	4.89014	5.53648	5.83572	5.46682	11.6367	11.0108
ESI-	191.057	2.29	HMDB0000763	5-Hydroxyindoleacetic acid	C10H9NO3	191.058	4	7.85711	8.73931	8.59891	8.1594	6.53558	7.2243	9.50592	7.96994	9.42283	8.6605	3.8764	4.5403	6.00722	12.4498	4.09246	9.53904	6.41968	3.5441	11.3572	6.82307	12.1282	3.74726	3.15792	6.68977	10.737	6.72179	9.07589	3.02994	7.95803	4.97345	4.64094	9.00466	8.60243	4.80763	8.51158	4.20863	11.4003	3.65519	6.54577	7.12155	13.0596	8.7627
ESI-	192.026	0.819	HMDB0000094	Citric acid	C6H8O7	192.027	5	6277	6869.41	6423.29	6574.19	6323.46	6805.88	5871.9	6180.77	7150.5	5830.16	7767.05	6403.88	8419.46	4797.19	5259.12	7717.03	4383.99	6974.36	8259.23	8983.56	5770.83	8073.82	8555.92	5712.12	5432.1	6153.21	6453.4	5614.79	7041.61	7400.84	8547.97	6505.46	7401.71	5014.21	5908.12	5202.08	4618.83	6674.34	6612.28	5840.31	4743.87	9116.22
ESI-	193.029	1.241	HMDB0041624	Phosphocreatinine	C4H8N3O4P	193.025	21	330.734	396.708	335.871	327.485	292.328	276.992	284.828	351.694	364.566	329.799	461.592	324.168	470.841	280.31	317.922	460.802	227.811	279.417	435.508	494.502	325.906	434.694	543.239	261.786	287.111	334.289	407.592	249.274	253.742	335.278	428.731	371.29	612.892	372.279	309.226	232.416	206.402	346.628	397.272	253.514	258.882	418.985
ESI-	194.042	0.817	HMDB0000127	D-Glucuronic acid	C6H10O7	194.043	3	83.3731	73.9134	67.1828	91.7268	68.7032	55.7921	89.5557	62.871	82.9062	66.688	69.9752	27.7688	89.6968	66.8742	27.9537	80.063	17.8868	134.711	23.4718	12.8409	75.6094	87.6822	91.2589	60.187	40.2349	98.3459	81.669	68.6555	83.5065	62.5288	59.7124	41.8379	47.6229	69.8121	34.4749	66.9556	71.1791	108.009	29.347	64.8741	71.5243	27.0553
ESI-	195.089	6.611	HMDB0014903	Metyrosine	C10H13NO3	195.09	4	18.0576	17.8337	20.4702	20.5037	20.9905	20.0128	22.883	22.9201	25.114	22.8024	37.4277	36.2249	25.687	28.2481	30.6752	24.7354	34.9721	27.4582	21.199	29.3034	21.5826	31.6586	31.2527	26.278	22.8644	21.4816	18.4312	20.3338	26.8509	19.3104	22.5631	18.8358	23.9096	22.4133	20.762	18.6505	22.0585	20.4018	17.5179	22.36	23.7278	25.1914
ESI-	200.104	4.244	HMDB0034491	Camphoric acid	C10H16O4	200.105	4	12.7985	13.7278	15.9059	12.8562	14.47	14.3217	15.187	13.6316	14.8778	14.3482	13.0594	15.2132	15.0434	15.043	21.2549	14.4093	18.6185	14.9156	12.7805	16.6959	13.8201	18.1935	15.4261	15.6663	15.4231	13.0443	11.6312	14.2798	16.304	12.1905	13.5799	12.8368	14.3294	16.7468	14.2242	13.9532	14.8231	12.0037	13.2219	15.1661	8.84129	15.7429
ESI-	200.177	8.661	HMDB0000638	Dodecanoic acid	C12H24O2	200.178	4	150.032	149.895	145.556	157.06	154.127	134.012	144.728	164.192	137.583	148.803	106.127	311.739	79.0914	82.3406	202.673	134.721	80.4594	58.0388	427.526	780.492	142.925	105.58	236.22	179.897	603.313	123.445	73.3984	78.7311	86.6379	75.2319	370.833	392.282	365.906	73.1945	161.858	64.5971	88.4424	83.102	369.397	161.793	75.8649	538.622
ESI-	202.12	3.763	HMDB0059719	Heptylmalonic acid	C10H18O4	202.121	3	138.188	136.234	154.817	129.454	139.617	131.716	160.772	150.139	157.23	152.939	137.89	166.531	142.937	168.512	167.835	157.31	201.238	162.275	157.722	173.854	144.792	181.284	152.709	147.253	150.215	142.01	115.594	140.534	145.1	116.263	131.556	124.886	146.322	131.861	139.864	118.229	140.975	124.302	126.025	144.734	135.788	133.805
ESI-	204.027	0.826	HMDB0031665	Daucic acid	C7H8O7	204.027	1	266.855	209.912	276.078	332.171	348.524	270.575	286.923	230.837	205.508	294.322	173.684	271.047	306.419	280.727	277.828	241.814	299.312	353.596	375.741	341.542	286.434	243.513	329.42	281.967	228.851	307.614	310.621	236.201	358.92	366.402	254.487	239.588	326.705	316.054	328.785	305.258	293.582	313.094	234.56	431.891	250.404	297.877
ESI-	204.071	2.899	HMDB0028819	Glutamylglycine	C7H12N2O5	204.075	15	10.263	10.8886	10.2235	9.55251	9.01709	10.2283	10.0194	11.4672	1.40706	9.73566	1.61438	2.98727	1.03554	0.853176	0.577875	1.07381	0.316311	22.2712	15.0072	0.40201	2.27201	0.24227	0.944364	18.7402	6.154	1.49196	33.5996	0.360542	36.6945	0.201855	6.66899	2.21206	2.09718	0.520639	1.94455	1.23767	1.97065	1.35459	1.96591	42.1066	1.16377	52.4652
ESI-	204.089	1.924	HMDB0000929	L-Tryptophan	C11H12N2O2	204.09	4	102.14	121.227	120.911	118.486	121.458	125.292	130.557	127.123	89.1578	137.921	113.84	139.131	176.619	181.78	145.8	123.236	70.4737	134.493	192.209	185.403	199.019	6.8654	168.821	122.426	135.224	75.4285	134.978	94.6975	112.131	130.232	120.324	176.421	127.678	146.214	128.518	136.164	144.886	110.078	135.911	72.1481	114.783	178.221
ESI-	205.058	1.097	HMDB0000962	Lipoamide	C8H15NOS2	205.06	8	7.66795	7.24615	7.56171	7.29316	7.35209	6.82283	7.45467	7.40487	7.51288	6.46721	6.46624	6.793	7.18911	7.03638	6.688	6.94651	5.36743	6.41698	7.83753	8.94597	7.01264	7.22608	7.60623	7.36419	7.40353	7.17709	8.45488	7.74513	7.93542	8.4598	8.22193	7.32184	8.67549	7.87732	7.95284	7.62968	7.99573	7.17694	7.42521	8.01947	6.54193	7.82131
ESI-	206.042	0.833	HMDB0000379	2-Methylcitric acid	C7H10O7	206.043	3	203.96	182.53	187.109	227.101	158.156	173.758	156.252	233.127	412.664	168.811	109.112	97.6156	112.885	94.9745	228.917	143.557	150.248	296.745	75.2426	64.2346	114.755	300.132	155.065	343.563	77.426	388.435	141.334	381.935	515.603	212.048	129.648	97.9743	106.961	147.834	156.792	295.784	192.915	122.552	107.91	291.746	209.281	55.1912
ESI-	206.167	8.708	HMDB0013816	2,4-Di-tert-butylphenol	C14H22O	206.167	2	6.26619	8.06143	5.98701	7.33035	9.45881	5.45607	6.42067	8.18032	8.39498	7.11349	7.11028	10.4822	5.01987	8.71058	9.23393	7.72269	7.39033	5.93307	10.8598	8.68174	6.87259	7.89125	8.53161	8.14532	10.7202	7.72779	6.90592	5.72286	5.72438	6.66955	8.44827	8.03716	9.09128	6.46305	7.75593	5.98869	8.27438	5.2564	8.53687	6.8214	5.65686	10.0515
ESI-	208.084	1.686	HMDB0000684	Kynurenine	C10H12N2O3	208.085	3	0.861971	0.786525	0.75467	1.98442	0.814935	1.24257	0.805711	0.83029	0.4095	0.920455	19.0635	0.590727	1.5349	1.02151	1.23528	0.914156	0.404662	0.975432	1.22734	0.883415	1.06031	1.05537	1.24254	1.04478	0.572832	0.481696	1.43971	0.370963	0.425587	0.484123	6.51058	0.386256	0.481651	0.528658	0.469598	0.928765	0.378799	0.516669	0.381005	2.46633	0.395431	0.402551
ESI-	210.037	1.107	HMDB0000663	Glucaric acid	C6H10O8	210.038	4	11.7947	14.5241	11.8091	13.7277	14.4589	16.0749	17.872	20.6952	17.6987	13.4088	18.0561	15.213	15.85	9.699	7.52856	23.2637	15.2278	12.4459	43.686	33.2527	8.56678	30.0625	19.9605	6.68282	26.1801	15.2374	12.1709	31.8636	24.1513	6.54135	60.5958	47.4225	19.8119	6.81069	25.2733	8.53767	9.53219	9.17576	29.1382	31.6688	11.5949	40.9914
ESI-	210.074	0.843	HMDB0002123	1,3,7-Trimethyluric acid	C8H10N4O3	210.075	7	237.065	226.208	87.609	228.536	247.662	226.328	212.801	216.371	244.383	186.227	158.672	264.926	213.412	122.548	140.68	176.696	59.5089	102.345	395.85	194.139	359.758	67.0997	412.971	305.164	396.67	241.537	820.475	96.3195	86.4759	275.491	442.789	316.44	257.793	361.311	171.663	211.207	149.614	222.35	419.222	231.428	228.192	200.513
ESI-	210.092	5.212	HMDB0033373	2-Ethyl-1-hexanol sulfate	C8H18O4S	210.093	3	572.929	353.061	790.594	524.467	359.312	331.981	539.792	557.437	5.14976	263.57	4.61572	4.52293	5.66468	6.14966	5.00405	15.5282	6.73262	5.56236	16.7209	5.17004	4.54501	6.23569	5.16036	4.98719	59.8864	4.99462	3.76342	4.73775	4.54043	3.71722	210.992	2.31861	6.90571	10.7102	24.6353	4.53499	4.65391	24.2647	7.83805	4.91871	12.404	112.777
ESI-	212.09	1.763	HMDB0033750	D-Glycero-D-galacto-heptitol	C7H16O7	212.09	3	0.433811	0.337507	0.384881	0.34224	0.356508	0.415212	0.362902	0.360114	0.397697	0.355768	0.360859	0.344331	18.6024	0.333554	0.397739	0.35775	0.21876	0.290151	5.54519	1.25902	3.07471	0.321267	0.388469	0.438094	0.391031	0.34483	0.406787	0.352079	0.33901	0.373166	0.388231	0.406856	0.400362	0.456835	0.393324	0.399841	0.357244	0.328284	0.729226	1.25984	0.368637	0.408728
ESI-	213.009	2.566	HMDB0000682	Indoxyl sulfate	C8H7NO4S	213.01	3	3.77632	3.89092	3.37046	3.79249	3.58753	3.46506	2.26313	3.60793	0.877147	3.18469	3.85702	2.13041	4.73924	7.88212	7.74241	3.48981	0.534701	5.61308	3.00854	0.691821	4.38351	3.19609	16.5419	5.0108	0.472673	0.530598	1.65361	1.42805	3.70865	0.951148	10.2906	0.804368	1.257	1.01297	1.41154	0.709961	0.968144	0.420976	0.424848	2.10733	0.441063	2.02558
ESI-	214.025	2.382	HMDB0001031	Deoxyribose 5-phosphate	C5H11O7P	214.024	5	8.87897	9.17547	8.18453	9.65563	8.4834	7.57128	10.7982	8.02028	0.140575	7.41912	0.125781	0.149797	0.130353	0.139084	0.139258	0.129182	0.350823	147.734	0.138419	0.159029	0.133166	0.148829	0.14492	0.131827	0.139129	0.127826	112.929	0.133176	0.142097	0.131018	0.136376	0.136903	0.144829	0.129595	0.132826	0.12181	0.131728	0.121517	0.126596	0.133695	0.126231	0.130114
ESI-	215.152	3.263	HMDB0013279	N-Nonanoylglycine	C11H21NO3	215.152	2	36.0074	37.8554	37.6218	38.5839	38.5099	38.4666	36.9563	39.8804	44.4456	42.8706	16.2483	30.4512	72.337	18.6403	93.381	61.4087	42.797	12.1117	73.2487	26.695	45.0298	14.9504	20.2601	23.0428	85.915	32.6529	23.4242	67.1234	13.9549	44.5824	118.598	52.3062	28.1463	42.8798	68.2086	66.5017	60.4697	88.9075	39.9287	90.342	78.0887	46.8245
ESI-	215.952	0.907	HMDB0014470	Nitroprusside	C5FeN6O	215.948	16	7.65803	17.3224	16.7326	13.6835	10.1068	20.3523	13.3887	7.0622	13.2533	15.0848	1.13625	9.03384	14.9639	9.16497	14.6231	11.1448	18.1119	1.21255	16.2421	5.14722	8.45066	2.72016	18.0829	1.65165	4.01899	6.10039	16.5862	19.7622	1.64065	9.77883	7.64296	4.54668	14.5245	6.5546	4.25729	19.3722	35.8213	13.237	39.0798	17.0217	8.55586	9.40756
ESI-	216.125	0.791	HMDB0004620	N-a-Acetyl-L-arginine	C8H16N4O3	216.122	11	13.0298	21.8518	33.0887	10.4678	8.18327	16.4149	12.4159	19.4491	6.09685	11.5391	12.1616	13.1259	17.2842	31.2773	6.60496	12.387	3.44887	1.31946	1.64915	18.3391	21.2317	1.53571	15.1967	29.9051	25.8327	9.5788	1.51643	27.7645	6.51367	1.74835	4.91934	11.2285	7.92411	5.48198	1.691	31.6247	24.2744	5.36122	34.5882	26.1268	19.9501	1.75865
ESI-	216.136	4.176	HMDB0000888	Undecanedioic acid	C11H20O4	216.136	3	67.959	68.6827	71.2062	67.9984	74.7449	66.2037	73.3747	70.5439	28.8216	70.5713	19.3327	27.2492	37.1954	20.2476	36.9513	28.0647	29.3516	14.3542	44.6263	22.0623	24.3804	19.1831	21.187	19.9877	40.1234	26.7512	19.3182	33.4593	20.427	25.651	52.4911	26.9708	42.7989	44.6686	36.1621	36.5951	27.4977	32.8531	23.8982	28.0822	41.9683	26.4424
ESI-	216.172	4.981	HMDB0000387	3-Hydroxydodecanoic acid	C12H24O3	216.173	2	5.81614	6.0145	6.11723	6.14493	6.51525	9.39096	4.30622	4.64259	6.35596	5.16121	4.29725	4.13412	4.68419	4.71615	7.2699	5.35871	5.77957	3.86301	6.2754	5.83828	3.72905	4.00609	3.67961	3.54096	4.78919	4.89588	4.50641	6.35585	5.38302	5.25226	9.57832	5.94804	6.90382	7.75201	6.94876	5.78225	5.5232	6.59241	5.00249	8.02101	6.3322	6.39837
ESI-	219.11	0.918	HMDB0000210	Pantothenic acid	C9H17NO5	219.111	2	67.9289	68.901	48.8474	56.287	63.3501	70.4382	78.8519	64.8975	70.5002	51.6249	39.9322	89.0317	61.7378	72.8119	33.9243	66.1934	77.3496	75.359	74.5806	87.7146	48.9914	55.2936	99.9971	66.8867	66.2712	78.1795	100.096	34.8317	40.8093	52.3388	63.4346	70.4788	67.7239	71.0382	65.6013	49.0216	44.8626	58.2041	113.077	76.5808	54.6165	61.4945
ESI-	220.084	1.518	HMDB0000472	5-Hydroxy-L-tryptophan	C11H12N2O3	220.085	3	1.35903	1.64263	1.25274	1.76874	2.08025	1.74822	1.40184	1.53625	0.659421	1.71405	91.1703	0.648288	1.88278	1.36791	0.885124	0.900539	0.376687	1.06648	1.25624	0.573325	1.05158	2.69293	1.13524	0.48845	1.36841	0.610809	1.60081	0.456595	0.554963	0.499249	3.33298	0.528807	1.29007	0.702305	0.63658	0.527625	0.493301	0.511554	0.656598	1.17694	0.505869	0.486969
ESI-	226.068	0.768	HMDB0011105	5-Acetylamino-6-formylamino-3-methyluracil	C8H10N4O4	226.07	9	359.025	305.572	267.163	259.552	244.347	234.681	263.561	370.63	268.462	177.572	160.466	251.451	279.212	109.88	140.395	232.742	420.673	115.443	349.377	271.985	232.257	105.772	357.728	344.404	324.703	97.6601	410.285	180.124	124.649	241.761	336.064	285.989	272.788	235.998	233.958	223.985	205.456	177.748	450.196	181.428	243.327	345.576
ESI-	226.193	9.101	HMDB0002000	Myristoleic acid	C14H26O2	226.193	2	18.3235	21.9312	19.2137	19.2745	25.2877	21.3328	19.7374	21.5334	28.967	26.2341	33.8704	36.2286	18.7467	33.8632	46.5627	26.1255	38.6402	26.6546	21.2274	55.7466	21.4052	20.7097	22.0026	31.0061	23.5875	22.7423	16.1087	12.9388	19.2288	16.0474	22.6417	16.9061	33.6352	51.1422	22.7639	15.329	27.4155	24.6851	27.4055	23.452	24.0665	21.3183
ESI-	228.136	4.461	HMDB0000933	Traumatic acid	C12H20O4	228.136	2	8.46089	8.9413	9.42796	8.9099	8.79692	8.19167	9.86329	11.0898	8.6063	8.67983	19.0694	19.5434	9.64172	15.1043	17.4346	8.60778	21.3959	6.6567	16.3	12.8149	15.0235	8.97762	11.5403	11.866	17.6476	7.84986	9.76935	4.93564	11.0702	6.60735	20.2083	6.60312	44.532	28.0097	19.9492	6.83747	13.5063	7.70843	11.7817	8.61687	12.4183	9.13694
ESI-	228.208	9.887	HMDB0000806	Myristic acid	C14H28O2	228.209	2	142.987	164.047	160.507	168.385	168.683	168.138	140.471	151.887	183.614	156.052	161.997	163.784	111.787	163.006	383.4	133.186	279.287	95.4928	156.531	192.384	122.83	125.57	151.539	188.018	279.413	151.658	116.909	125.788	153.308	128.088	166.44	164.05	254.928	227.665	152.799	110.852	156.1	173.016	164.243	148.946	124.427	149.849
ESI-	229.167	3.769	HMDB0013267	Decanoylglycine	C12H23NO3	229.168	2	36.5434	37.665	39.3319	38.0377	37.4139	37.439	38.7246	38.0576	44.0529	39.9873	22.2761	38.8894	45.4005	24.6758	58.7101	47.2469	34.7653	16.6953	61.2401	27.6962	27.8365	19.4031	22.2192	23.3411	56.9676	38.0006	32.5948	48.4862	18.8042	33.8564	67.3108	39.986	33.4336	33.622	41.2597	41.7159	40.4665	45.9338	36.7172	44.232	50.9526	49.6834
ESI-	230.019	0.819	HMDB0001548	D-Ribose 5-phosphate	C5H11O8P	230.019	2	104.947	90.7037	80.0318	105.115	81.4309	67.7822	106.444	72.8511	110.382	82.939	82.1086	42.5301	91.5619	73.7715	34.0465	84.6966	18.396	167.491	23.3414	13.1947	82.0063	106.152	102.002	73.6612	44.1677	113.385	90.1423	100.116	128.377	79.1546	70.507	48.7008	54.734	77.0125	46.3746	84.3482	90.3517	116.434	28.5951	81.3348	86.3413	28.9437
ESI-	230.151	4.76	HMDB0000623	Dodecanedioic acid	C12H22O4	230.152	2	55.461	53.0238	55.9238	54.0058	53.3994	53.8638	54.9105	55.4604	13.5319	55.9131	11.7113	19.3007	11.5197	12.9414	18.832	11.1974	16.0546	9.23707	18.4315	17.5792	10.8085	10.9118	12.8099	12.3613	15.0219	17.7786	11.831	11.1803	11.6551	11.3173	19.6941	12.7972	14.7965	17.7951	13.3481	10.2133	11.7216	13.2251	9.55991	12.9599	13.7387	13.2478
ESI-	231.074	0.819	HMDB0001180	N2-Succinyl-L-glutamic acid 5-semialdehyde	C9H13NO6	231.074	2	18.1428	22.9649	13.8586	18.8405	17.5049	21.093	15.662	16.4602	24.1488	23.4077	27.2802	29.0267	22.4902	12.4732	5.24812	19.7823	24.8325	20.8008	29.691	24.0002	17.5528	6.45337	25.5711	20.4255	42.6081	29.4634	16.2996	5.94349	12.4341	14.1147	11.6788	23.779	18.5466	26.7141	13.3849	9.8699	14.5063	11.3083	47.4612	24.5285	13.9159	17.4433
ESI-	232.084	3.468	HMDB0015305	Phenobarbital	C12H12N2O3	232.085	2	9.7871	10.7994	10.1448	9.79762	8.57873	8.75322	8.77679	9.12615	0.234926	8.24243	0.167953	0.1939	1856.88	0.603026	0.484354	0.184182	0.435128	0.176266	0.193594	0.220423	0.205164	0.210564	0.200708	0.274669	0.282585	0.173483	0.182433	0.2301	0.226666	0.176691	0.196651	0.185615	0.186121	0.180124	0.187936	0.167379	0.184667	0.166381	0.171764	0.19016	0.178094	0.185467
ESI-	234.162	8.027	HMDB0035794	beta-Costic acid	C15H22O2	234.162	1	34.8853	33.9377	38.009	37.0608	37.3583	46.178	40.7152	37.9171	41.3331	37.6344	36.2168	46.6837	67.0148	46.065	45.7094	39.3257	48.5268	36.1241	46.4537	46.2881	34.2314	44.0696	52.6806	36.6295	38.5577	38.301	33.3772	31.2138	35.6351	38.4616	44.9681	38.1834	35.1076	31.977	39.5118	35.9957	36.0025	34.5053	37.3709	38.2484	39.3735	38.5346
ESI-	239.939	0.723	HMDB0000192	L-Cystine	C6H12N2O4S2	240.024	32	415.13	520.448	435.61	552.856	1466.59	476.495	459.653	466.929	605.711	504.564	734.725	502.531	388.9	1322.43	443.812	412.325	399.518	417.466	452.836	604.705	327.859	557.499	402.782	423.809	553.698	418.962	421.115	542.251	446.246	1349.56	475.115	391.728	474.281	499.605	581.981	455.803	461.089	499.495	595.488	405.29	1380.04	448.621
ESI-	240.128	9.407	HMDB0000745	Homocarnosine	C10H16N4O3	240.122	23	2.02704	2.8834	3.09058	2.39504	2.56984	3.62523	3.26213	3.06778	2.85162	3.52413	2.79365	1.94139	2.77348	2.1544	2.31626	2.28981	2.50877	2.68219	2.32922	3.08231	1.40105	3.03212	2.16606	1.75649	2.12604	1.84605	2.28122	2.07538	2.70247	1.35658	2.55863	3.26134	2.72622	2.8352	1.71486	2.72422	1.66949	1.90401	2.35683	2.83678	3.17215	1.77503
ESI-	242.019	0.819	HMDB0001125	Inositol cyclic phosphate	C6H11O8P	242.019	1	147.193	130.359	128.532	177.593	107.557	119.434	103.805	171.127	324.787	116.632	62.1906	38.3709	47.7872	58.5506	69.4756	63.954	121.957	215.775	19.0153	2.71971	52.8449	254.09	105.019	279.569	15.2135	307.525	89.19	346.52	478.655	153.477	79.8768	68.5689	46.2175	105.526	112.257	265.987	147.53	70.4888	8.63374	234.712	153.728	15.3643
ESI-	242.151	4.76	HMDB0038736	(3E)-4-(1,2,4-trihydroxy-2,6,6-trimethylcyclohexyl)but-3-en-2-one	C13H22O4	242.152	1	6.04579	8.36198	7.62966	7.05574	8.9157	7.24024	9.2254	6.93521	4.62086	8.22168	5.15774	6.21065	4.20531	8.08589	22.0718	4.08771	7.63615	3.89031	6.43744	7.7503	7.73892	4.14722	7.12514	5.8158	15.3834	6.07521	3.87799	12.9717	4.69715	4.88142	11.4004	7.77185	9.82425	7.0045	6.30739	3.12717	2.78271	6.06936	4.37406	4.53349	8.28912	5.51604
ESI-	242.224	10.489	HMDB0000826	Pentadecanoic acid	C15H30O2	242.225	2	68.9004	133.366	102.891	86.696	67.6703	121.202	90.6293	107.686	111.656	64.2156	84.5618	193.794	73.448	23.5624	48.3984	118.963	14.3555	19.0414	166.146	189.948	52.3078	93.0851	92.5762	60.8037	181.705	101.035	59.3439	27.7449	85.0391	88.5855	160.936	161.856	219.392	56.2394	136.823	97.3603	116.518	33.393	185.5	122.107	102.505	218.777
ESI-	243.087	0.794	HMDB0000089	Cytidine	C9H13N3O5	243.086	6	34.244	58.5185	49.7613	50.415	51.7748	54.9494	51.994	63.5743	37.2985	62.0562	46.0045	132.195	31.8551	13.5794	27.3528	58.8094	98.9181	33.4275	106.692	164.251	38.7526	65.4576	74.0864	41.1863	109.692	35.5317	17.9275	37.9462	74.3688	29.5541	67.4265	85.8246	103.563	25.7671	109.47	26.3277	40.0079	43.8206	76.3354	50.7621	26.1969	141.092
ESI-	243.183	4.303	HMDB0013286	N-Undecanoylglycine	C13H25NO3	243.183	1	845.588	905.656	921.284	915.368	934.004	921.349	991.853	923.829	1514.28	893.706	447.264	1092.77	2071.13	393.301	2362	1917.14	753.048	335.011	2339.32	808.6	1067.11	391.703	568.708	632.176	1579.55	1324.56	539.111	2011.57	297.442	1562.97	2974.13	2041.46	837.746	1610.06	1638.21	2139.04	1446.97	2153.84	837.816	1725.52	2420.21	1778
ESI-	244.069	1.246	HMDB0000296	Uridine	C9H12N2O6	244.07	1	152.71	131.631	166.367	155.84	143.361	130.208	144.631	167.09	180.474	172.032	138.558	214.097	160.82	142.393	91.4367	182.719	98.1075	126.841	265.275	213.152	156.868	114.911	200.723	125.24	303.458	179.682	189.07	120.276	148.33	128.069	199.299	130.931	127.83	180.381	162.433	130.873	147.859	126.974	147.001	122.175	140.651	144.819
ESI-	244.092	1.629	HMDB0000030	Biotin	C10H16N2O3S	244.088	15	1.12236	1.36467	0.945074	1.80849	1.82356	1.33005	1.63326	1.99814	2.37552	1.69942	8.14931	1.70449	1.20344	1.31691	46.2614	2.871	0.244594	1.09192	0.55455	3.1906	1.64006	0.368512	0.563913	1.7047	1.25952	3.41164	0.493876	1.28821	0.403673	0.46263	1.68373	1.75859	1.54741	1.56065	1.14497	0.413097	1.39079	1.4654	2.37287	0.94036	0.564652	0.440634
ESI-	244.167	5.348	HMDB0002327	1,11-Undecanedicarboxylic acid	C13H24O4	244.167	2	16.0875	14.5121	16.6474	17.0532	16.821	14.2214	15.9294	16.6323	10.2004	18.2146	3.65423	12.6523	14.6373	3.05088	14.8928	16.4006	4.22796	2.90783	34.5939	13.281	8.67423	3.18325	2.68084	2.78682	19.8923	9.51318	5.06363	13.3437	2.80549	8.6165	49.6616	18.7346	10.847	8.68854	13.5843	13.421	4.76268	16.4248	10.6404	12.1167	18.1599	24.7631
ESI-	250.12	5.067	HMDB0002012	Ubiquinone-1	C14H18O4	250.121	1	0.972294	0.976113	1.43122	1.36804	1.43197	1.44079	0.688099	1.60028	2.0645	0.994361	1.48151	1.08761	31.3137	1.82068	1.95672	1.08652	2.38162	1.54164	0.282184	0.273341	7.59664	1.75274	0.63984	1.87764	0.389103	1.85684	0.968236	1.10828	0.332158	1.40741	0.266356	0.200114	0.64425	1.56953	0.963745	0.917928	1.37688	0.737203	0.221369	1.14072	1.12582	0.467107
ESI-	250.145	2.268	HMDB0034750	Isopentyl beta-D-glucoside	C11H22O6	250.142	12	0.130829	0.123045	0.128946	0.130197	0.132762	0.128759	0.131074	0.130281	0.142254	0.126182	0.124055	0.140553	0.132885	0.138458	0.133371	0.132703	0.154366	0.130072	0.135754	0.162603	0.133804	0.145777	0.141916	0.185285	0.137782	0.12793	0.12883	0.131148	0.134448	0.126551	0.134832	0.13335	0.140781	0.130273	0.132374	0.118716	0.134017	0.121618	0.125837	0.134759	0.126313	0.133913
ESI-	253.08	4.859	HMDB0000845	Neopterin	C9H11N5O4	253.081	3	0.88228	1.06565	1.61928	0.832896	1.19834	0.77549	0.914946	0.831512	0.675145	0.242356	1.11468	0.78347	0.230208	0.4902	1.78681	0.255477	0.531303	0.226105	0.517677	0.383849	0.626523	0.4115	0.615519	0.916532	2.14284	0.217972	0.254514	0.46843	0.384867	0.28535	3.78873	1.74139	4.1446	2.10023	0.897803	0.289865	0.270661	0.598785	0.423865	0.226088	0.404041	0.999777
ESI-	253.802	0.807	HMDB0000675	Iodine	I2	253.809	29	5.21046	5.32644	4.5514	5.01889	5.24813	4.8339	4.36529	4.7085	4.97509	4.78728	4.38029	5.1549	4.68658	4.81245	4.0683	4.75431	5.26607	4.68602	5.14339	5.65593	4.57642	4.78959	4.9374	5.07542	4.75576	4.64611	5.07293	5.40352	5.68485	5.45279	5.42737	4.9967	5.18672	4.68999	5.27393	4.50288	5.18687	4.86857	5.93297	5.24144	4.74944	5.48491
ESI-	254.224	10.218	HMDB0003229	Palmitoleic acid	C16H30O2	254.225	1	243.066	308.835	276.143	336.457	269.581	295.428	211.523	241.319	351.944	285.027	503.176	490.803	237.421	445.343	583.587	314.697	479.567	240.308	226.46	773.196	243.534	231.021	268.251	359.193	225.879	300.588	254.352	220.161	253.858	231.437	325.339	200.166	450.452	740.87	335.866	211.475	333.925	380.505	333.548	348.425	330.744	248.685
ESI-	256.24	10.928	HMDB0000220	Palmitic acid	C16H32O2	256.24	1	1720.05	1602.9	1935.08	1842.35	1691.33	1860.15	1590.19	1602.94	1558.49	1446.43	1484.31	1604.46	1256.38	1697.1	2715.07	1390.56	2397.83	1139.24	1548.15	1558.44	1513.58	1451.99	1609.24	1658.72	2840.58	1293.42	1430.06	1720.02	1880.95	1696.89	1659.56	1794.59	2062.95	1430.64	1657.17	1393.51	1595.09	1491.21	1676.41	1678.76	1657.4	1917.29
ESI-	257.199	4.853	HMDB0013272	N-Lauroylglycine	C14H27NO3	257.199	1	6.22356	5.80612	6.60419	6.48789	6.54201	6.23003	6.84478	7.10173	10.4304	6.61273	4.2493	8.05094	13.6094	4.3891	16.1801	13.2545	8.64541	2.53205	16.2592	5.34029	7.39352	4.2998	4.37849	5.64183	14.7589	8.30528	4.78882	13.5176	4.58118	9.99554	19.7403	11.1307	6.37852	10.1087	11.4272	12.9568	10.1491	15.2508	6.80121	12.6007	14.6043	12.3
ESI-	258.087	3.789	HMDB0000884	Ribothymidine	C10H14N2O6	258.085	6	3.35341	3.09112	3.57567	3.75736	3.34163	3.82762	4.38555	4.37992	4.48118	4.63553	3.55343	4.64597	141.83	3.83644	4.09792	3.74671	3.17991	3.90473	4.16651	4.62346	11.8704	4.56819	4.68835	3.96691	4.08652	3.89286	2.83198	2.97464	3.08413	3.07679	3.00509	3.12469	3.16932	3.76762	3.10393	3.48777	3.37234	3.65985	3.92685	3.2006	3.06244	3.64372
ESI-	258.183	5.933	HMDB0000872	Tetradecanedioic acid	C14H26O4	258.183	0	23.6919	24.4504	23.8776	23.4061	25.3758	23.7012	23.6752	27.4993	6.73928	25.4326	7.8543	8.05892	4.13907	6.45423	9.54862	6.15445	6.43366	4.46306	6.56485	6.35281	6.71833	5.71857	5.29167	5.05103	6.01384	5.50163	5.08265	4.1599	5.48645	4.77404	8.43212	5.54051	6.32908	7.7748	5.39526	5.24285	4.44282	6.33996	5.85342	5.28877	6.0621	6.03919
ESI-	260.029	0.83	HMDB0001401	Glucose 6-phosphate	C6H13O9P	260.03	1	151.494	141.108	132.288	194.622	112.782	129.612	112.82	175.013	337.157	123.008	65.8062	42.6259	51.6556	62.5229	72.8337	67.8783	137.361	229.171	23.2608	7.94002	56.6225	263.565	109.48	291.223	19.139	316.513	93.6724	355.715	503.133	176.191	84.3568	73.0801	50.4988	110.74	116.611	275.493	153.692	77.9253	13.531	247.484	161.267	19.8917
ESI-	262.142	2.794	HMDB0031897	Phaseolic acid	C12H22O6	262.142	0	16.9089	12.7499	12.2792	12.3969	12.2561	12.6761	13.3725	13.3524	8.1746	12.7475	12.5246	11.8526	12.9388	10.7734	18.7194	12.5664	29.3636	6.97452	8.79355	7.50601	11.4694	8.89683	8.77748	9.70259	15.5426	7.72643	8.09139	7.56574	8.65132	12.6428	17.3133	10.0592	15.9453	11.9855	19.2814	7.74939	9.59906	9.0222	8.96637	7.57629	14.228	7.96813
ESI-	264.111	2.32	HMDB0004259	Acetyl-N-formyl-5-methoxykynurenamine	C13H16N2O4	264.111	0	13.7026	12.119	11.628	13.2995	19.5245	18.1204	20.2504	14.4739	3.32161	14.3389	13.737	10.6545	95.0962	57.714	36.5079	9.47786	1.82802	59.3235	10.5095	8.56885	12.2257	17.4514	31.1693	27.7341	3.41555	1.69348	11.9671	7.22605	15.1322	7.26917	21.5698	2.55786	3.44554	2.51187	8.36307	5.88567	6.17053	3.99324	4.67891	3.77223	1.75332	4.06814
ESI-	266.155	11.096	HMDB0036152	Alkhanol	C15H22O4	266.152	16	1371.97	1738.47	1322.6	1588.29	1487.3	1483.21	1687.09	1845.49	1422.99	2121.57	1650.49	1631.67	1226.23	1773.32	2283.3	1715.54	3979.81	1499.36	2123.44	1508.31	1928.36	1726.05	1411.97	1527.04	2145.93	1217.26	1599.21	1068.38	1532.57	1132.82	1304.09	1415.31	1960.49	1498.86	1404.18	1298.66	1156.06	1537.25	923.719	1307.81	1443.76	1283.89
ESI-	268.051	5.233	HMDB0000676	L-Homocystine	C8H16N2O4S2	268.055	16	6.29194	6.19508	5.80358	6.16186	6.47608	5.39788	6.11762	6.35558	0.25106	5.6438	0.859547	0.560515	0.699695	2.12263	1.07912	1.32804	0.77048	0.372951	0.234836	0.262246	0.245797	0.373338	0.426832	0.266945	0.921772	0.241374	0.246093	0.293267	0.2775	0.228789	4.84214	0.262568	0.254928	0.330124	0.246987	0.327407	0.320433	0.401353	0.223748	0.254133	0.347533	2.10213
ESI-	268.081	1.42	HMDB0000195	Inosine	C10H12N4O5	268.081	0	32.1494	32.5571	36.8572	31.0106	37.0017	32.477	34.3671	35.2407	53.6874	31.5207	21.3055	32.65	45.0397	31.0634	26.3604	38.3871	15.1598	20.5642	40.7432	43.2825	35.2502	16.7103	34.3117	31.283	55.9733	46.8963	37.3647	22.4358	38.9182	45.489	26.358	26.2689	37.6449	30.33	36.5889	28.2847	30.3947	47.4399	44.346	40.5834	42.5173	52.6274
ESI-	268.165	8.661	HMDB0038165	Acoric acid	C15H24O4	268.167	9	39.1884	39.2678	40.0776	42.4011	42.1366	39.9664	41.5776	43.3423	37.2024	41.2091	33.164	90.2125	27.4434	24.9747	54.369	39.0176	29.2265	16.9049	97.1726	155.568	38.7861	29.7498	62.3987	44.7829	119.709	35.7359	19.5367	20.9606	22.5307	20.4033	76.9493	76.7472	79.3764	21.3237	45.1399	18.0087	26.135	23.1617	79.9146	42.0944	22.5396	107.677
ESI-	268.24	10.538	HMDB0060038	10Z-Heptadecenoic acid	C17H32O2	268.24	1	28.941	34.3783	29.4101	36.4217	36.489	27.0931	15.6828	33.6514	49.9911	30.4441	52.2149	69.1695	13.558	38.0317	50.2333	46.201	38.0803	25.189	43.0294	102.075	38.6843	24.2558	23.7804	45.0906	39.0087	34.7213	14.412	12.6124	30.4816	12.9902	47.5381	44.5683	89.1284	38.4385	54.6793	17.4236	42.4727	32.003	49.7709	40.2628	17.8925	38.3557
ESI-	270.095	0.844	HMDB0028881	Histidylaspartic acid	C10H14N4O5	270.096	6	217.1	231.788	73.9184	216.246	251.531	208.371	239.247	216.214	251.522	184.046	153.554	231.241	196.838	107.086	124.354	214.818	114.434	90.8939	398.129	225.209	360.699	71.5425	402.859	292.443	414.527	248.833	749.792	102.456	97.5911	240.5	432.115	274.694	275.307	346.978	173.808	186.466	173.696	200.354	462.848	215.526	235.172	215.717
ESI-	270.219	7.971	HMDB0010733	3-Oxohexadecanoic acid	C16H30O3	270.219	0	53.615	62.5011	69.5223	78.9863	69.8531	121.619	72.9799	66.9589	17.2074	70.3542	40.308	38.8336	31.4013	55.262	51.0931	34.9726	55.2647	17.062	38.5338	21.1949	42.6811	37.2273	45.3792	35.109	54.5639	18.0896	22.5076	16.5102	39.0621	16.594	78.4078	17.4282	18.4583	10.8117	25.3372	31.3565	17.7557	15.2349	38.1656	18.269	15.8393	49.485
ESI-	270.256	11.32	HMDB0002259	Heptadecanoic acid	C17H34O2	270.256	1	58.2619	64.0343	58.5512	60.4992	54.0836	56.6055	34.8099	35.3902	45.3653	44.5149	62.8135	51.7136	36.6165	40.7552	78.1665	45.9354	58.4067	35.8374	44.9179	73.7797	29.532	36.4453	43.9331	44.0783	53.6084	39.8815	46.3489	39.079	51.8942	37.0384	64.1522	48.6808	69.4904	84.0342	60.407	35.6488	52.7164	57.8672	49.4994	54.0027	52.1769	48.6017
ESI-	271.215	5.418	HMDB0013317	Tridecanoylglycine	C15H29NO3	271.215	0	33.3065	30.1098	30.7978	32.4877	35.9886	32.9509	32.427	33.7458	52.6721	27.9879	13.811	24.5692	72.6593	12.6203	94.4143	70.0385	30.2846	10.1195	108.95	27.8339	38.3844	15.1727	20.2742	21.9417	80.3158	46.5082	20.4912	78.0707	11.3393	51.3175	147.86	76.3309	30.4733	66.8094	65.6584	77.8089	58.3974	99.6551	31.7224	75.444	92.6123	66.3808
ESI-	272.235	7.601	HMDB0010734	beta-Hydroxypalmitate	C16H32O3	272.235	0	80.3238	79.1506	87.7452	87.0612	91.3534	72.2806	71.915	83.3819	56.1963	83.371	39.946	48.7359	40.3859	61.7463	53.7936	36.6582	46.5223	32.9665	44.6041	48.6868	36.7583	40.203	49.2481	42.5769	48.4688	42.6142	50.6403	38.2854	74.2403	51.6194	116.393	56.5012	57.8517	57.37	54.8535	70.6549	47.3094	41.9389	62.7233	46.1629	45.7094	63.0874
ESI-	276.027	2.892	HMDB0001316	6-Phosphogluconic acid	C6H13O10P	276.025	9	0.685969	0.678093	1.59284	0.824659	0.505347	1.45159	0.282872	1.04866	0.349155	1.2404	0.365774	0.552282	0.40345	0.330483	27.6915	0.390427	0.335257	0.350163	0.351835	0.843926	0.292296	0.548702	0.305605	0.280791	0.292126	0.647927	0.376325	0.3719	0.573722	0.268011	0.665916	0.264401	0.340594	0.448056	0.291283	0.507656	0.446649	0.600261	0.257542	0.625644	0.632085	0.787412
ESI-	277.865	14.601	HMDB0040450	2,3,4,5,6-Pentachlorobenzyl alcohol	C7H3Cl5O	277.863	9	243.123	252.034	245.456	226.671	249.233	237.379	223.92	247.932	226.977	224.7	199.911	234.602	199.754	205.861	146.965	225.39	274.526	234.594	222.716	269.872	215.515	291.07	218.556	240.187	212.507	210.676	254.533	272.093	205.604	243.165	245.295	241.813	255.979	245.509	233.656	229.825	267.604	243.962	238.391	245.271	242.177	178.993
ESI-	278.188	7.191	HMDB0031928	Panaxytriol	C17H26O3	278.188	0	6.87882	7.41008	7.79231	6.45593	8.21065	7.25351	8.65719	7.68553	5.69272	8.00427	2.71058	4.35144	3.41212	4.41655	4.71279	7.62665	4.31724	5.92311	11.2426	8.08838	5.29278	6.72172	11.8749	5.9758	8.27815	5.81194	5.24822	3.98324	2.99964	4.23566	8.45112	7.94991	6.07284	8.83446	10.7572	8.38761	3.98087	5.22875	6.5168	4.96828	8.46563	10.925
ESI-	280.24	10.368	HMDB0000673	Linoleic acid	C18H32O2	280.24	1	264.033	310.817	288.378	301.854	328.613	312.359	337.704	317.509	296.556	307.73	544.267	514.485	353.09	749.84	731.835	258.21	629.513	184.043	304.042	392.599	348.308	301.628	536.655	445.2	968.055	290.446	286.968	292.367	375.011	259.373	339.961	375.854	686.974	332.934	319.255	154.853	284.971	243.507	450.87	203.901	217.725	379.185
ESI-	282.256	11.102	HMDB0000207	Oleic acid	C18H34O2	282.256	1	432.965	448.32	463.663	475.314	495.897	457.909	349.948	458.869	440.406	368.429	544.836	602.721	393.809	574.934	722.834	354.445	651.383	266.479	400.696	621.73	388.015	397.56	473.722	498.381	717.299	349.633	463.216	326.78	504.76	374.937	470.255	475.427	976.352	568.571	552.188	307.492	452.557	443.204	528.985	393.188	409.301	495.949
ESI-	284.145	6.81	HMDB0000372	16-Oxoestrone	C18H20O3	284.141	12	0.763079	0.777396	0.929268	0.662194	0.479626	1.05652	1.01907	0.290798	0.708451	0.797598	0.464205	0.169444	0.148212	0.164899	0.155708	0.162272	0.196946	0.548112	0.548285	0.629054	0.52956	0.585903	0.413731	0.507881	0.512715	0.520475	28.0949	0.172972	0.210766	2.6441	0.453432	0.182218	0.158967	0.202986	0.191342	0.153572	0.163835	0.202443	0.285331	0.375705	0.537228	0.478764
ESI-	284.271	12.251	HMDB0000827	Stearic acid	C18H36O2	284.272	1	4012.74	4412.39	4273.22	4484.34	4220.67	4010.47	3366.8	3703.82	3150.17	3943.4	3475.03	3653.02	3077.79	3601.69	5241.54	2839.32	4462.27	2592.69	3113.79	3740.28	2942.73	3621.27	3971.2	3651.56	6374.59	2899.28	3344.26	4022.38	4646.86	3805.64	3644.08	4448.3	4189.9	3943.68	3998.33	3239.23	3634.87	3635.87	3806.42	3798.8	3691.93	4253.39
ESI-	286.214	7.114	HMDB0000672	Hexadecanedioic acid	C16H30O4	286.214	0	12.9896	10.8557	14.0319	12.838	12.5145	13.6624	14.9225	12.636	4.07856	14.681	5.1741	4.61359	2.8362	3.89223	7.91675	3.74759	4.20113	3.40758	4.51094	4.87809	3.70974	3.07851	3.07506	3.24125	3.44227	3.70272	3.5461	2.52613	3.66224	2.96003	6.60196	3.42989	4.73931	5.68305	3.59251	3.34601	3.26316	4.25303	3.79946	3.09048	3.20096	2.70318
ESI-	288.23	6.263	HMDB0037798	(S)-10,16-Dihydroxyhexadecanoic acid	C16H32O4	288.23	0	5.49256	4.80318	5.95542	5.37331	5.3698	5.28828	5.96973	4.81834	7.03897	4.88749	6.50361	5.99905	6.23273	6.4957	8.39304	7.33603	8.03151	5.68799	5.73801	9.03806	6.28128	6.86255	5.58504	6.50308	6.44791	6.16979	3.58331	4.45122	5.25469	4.45172	5.13794	5.45227	6.45686	5.60666	5.72065	4.58757	5.5038	5.41474	5.37981	5.9349	5.15608	5.31607
ESI-	291.025	1.675	HMDB0001355	Parathion	C10H14NO5PS	291.033	28	8.32081	8.11211	9.24872	10.2686	8.39178	8.52901	9.44203	9.86281	8.71405	9.19561	8.21857	9.37098	12.1617	11.9191	8.61888	7.34904	7.9516	17.0661	10.4171	11.7781	12.8558	8.10163	17.0325	9.85776	8.72357	6.92749	9.20042	7.54508	8.08188	8.18168	9.5148	6.38047	7.95205	8.18045	10.5579	8.47278	8.53465	9.39598	10.365	7.68721	7.7748	11.4264
ESI-	292.117	10.507	HMDB0041269	Pantoyllactone glucoside	C12H20O8	292.116	3	8.38963	10.6859	5.58563	11.226	11.2247	9.53631	11.3221	10.3446	1.17015	9.58598	0.878931	1.40331	0.909617	0.613358	0.818783	8.4303	0.728195	3.38763	4.21424	1.47453	1.96562	6.72164	2.09273	2.06666	16.1744	0.924893	1.36024	0.968538	1.18399	38.4641	91.0628	4.36062	7.7954	5.14641	5.10388	1.93878	1.06176	42.5626	2.68584	15.948	5.11691	11.0088
ESI-	292.168	8.04	HMDB0035687	Acetylvalerenolic acid	C17H24O4	292.167	0	1.37781	3.90425	3.72454	3.58031	3.75607	3.47577	3.24534	3.23337	12.4032	2.53232	4.48601	2.625	2.52628	2.38017	8.32479	7.9045	8.48015	4.14651	5.53728	2.17161	4.22966	3.53594	4.28077	8.56298	2.3809	11.0314	3.3387	3.88497	4.22736	3.19173	6.43832	15.4741	8.5257	2.07561	6.55809	7.39955	7.62721	8.04467	6.98127	4.03712	4.64065	6.4162
ESI-	294.22	8.214	HMDB0004669	9-OxoODE	C18H30O3	294.219	0	9.95606	11.3874	9.16828	9.58113	9.98031	10.2524	10.0644	8.53445	11.0153	9.12939	21.735	21.9278	15.4442	17.9712	15.3824	14.5337	42.8665	5.9965	13.6116	14.5365	14.8308	9.27341	10.6842	11.4342	32.8705	11.1334	13.3368	7.24587	12.744	11.9406	24.5166	7.07024	42.3681	19.6549	16.239	9.32694	15.0541	11.5457	18.1319	12.7299	21.5928	11.6178
ESI-	296.235	8.819	HMDB0004702	12,13-EpOME	C18H32O3	296.235	0	47.3808	51.1321	56.3347	53.629	53.4612	55.1286	47.2278	57.3462	52.6945	49.8492	68.5429	73.6319	55.6024	69.804	69.215	60.4481	85.7774	37.378	53.2335	61.1723	70.3273	64.2824	50.6077	56.177	102.126	55.8111	47.63	33.4494	54.5728	43.3863	66.9484	34.7237	137.397	72.6372	67.7168	63.2156	56.136	44.2192	64.9605	48.4174	35.1236	79.6202
ESI-	298.142	2.884	HMDB0036159	Toxin T2 tetrol	C15H22O6	298.142	0	119.512	130.648	146.569	148.735	142.318	132.586	135.633	140.245	5.11405	124.938	10.9266	11.2883	42.9398	13.8922	31.6472	4.30322	46.5394	4.80827	7.06416	14.5289	4.45002	8.88683	12.9324	5.54736	14.2214	5.19073	5.66447	1476.06	6.57054	6.94413	7.09076	7.11277	15.799	13.7255	48.0828	4.82112	2434.36	7.79598	10.1528	5.52804	5.08684	98.8424
ESI-	298.16	11.243	HMDB0034054	Auraptene	C19H22O3	298.157	10	196.56	211.18	205.571	231.902	195.151	141.247	220.178	248.839	128.956	267.696	178.271	112.125	102.382	189.784	230.344	235.587	392.313	104.281	187.742	186.817	109.992	172.658	155.278	89.3749	251.126	99.2807	53.6752	68.448	105.244	85.2911	294.029	197.591	256.769	281.664	212.694	84.6207	118.18	111.107	125.591	132.88	165.667	161.782
ESI-	298.251	9.121	HMDB0034297	Ricinoleic acid	C18H34O3	298.251	0	88.6249	83.641	85.4529	103.097	82.6853	94.1154	72.69	103.483	42.5102	82.7323	16.13	20.4926	11.0466	58.0325	117.296	14.3285	27.673	11.2222	25.2306	51.7548	15.9821	63.1996	134.319	47.4274	86.1256	14.3741	11.4639	16.0998	16.136	37.4419	76.6329	17.4024	19.9665	39.8798	16.9188	11.7836	40.1803	13.5915	16.1817	10.3365	11.3824	15.5211
ESI-	298.287	13.187	HMDB0004085	Tuberculostearic acid	C19H38O2	298.287	1	22.2635	26.5722	27.4108	31.6711	26.7074	25.6061	22.5369	20.2597	18.9665	21.4966	22.5325	19.1976	15.7761	26.7523	42.5573	15.3432	33.6538	12.0296	19.5507	23.7875	15.8093	18.8404	23.2621	22.6319	48.209	17.1832	16.7915	23.7866	22.5693	21.1667	21.859	23.2892	28.9139	25.8801	25.2789	16.1556	22.5925	23.5299	24.8209	18.353	20.476	26.1903
ESI-	300.072	3.466	HMDB0029920	beta-D-3-Ribofuranosyluric acid	C10H12N4O7	300.071	5	2.20236	2.37331	2.779	2.36141	2.18779	2.032	2.40174	2.23474	0.20814	2.09194	0.182194	0.217648	436.782	0.200087	0.193789	0.196755	0.231106	0.19509	0.210009	0.239113	0.204037	0.228417	0.209291	0.201699	0.204391	0.188192	0.197901	0.205828	0.216041	0.191672	0.213325	0.192959	0.201902	0.192584	0.203871	0.185244	0.200325	0.180488	0.186328	0.199549	0.193194	0.202806
ESI-	300.266	8.847	HMDB0062549	2-Hydroxystearic acid	C18H36O3	300.266	1	88.6338	69.9209	81.2901	80.3031	86.7448	84.1529	78.9595	63.1216	29.5585	76.9654	26.8414	234.186	20.5625	57.6145	53.0938	27.5106	81.8859	16.3635	50.7384	28.4253	25.9545	31.968	53.5101	42.9251	65.4888	27.5519	28.7933	30.0847	29.6782	33.3484	110.734	32.0761	42.9943	49.0375	32.9918	35.7524	31.7238	42.9233	41.1834	29.5873	36.0879	45.0143
ESI-	304.091	1.334	HMDB0001067	N-Acetylaspartylglutamic acid	C11H16N2O8	304.091	1	109.271	99.0813	111.531	140.304	141.448	129.232	116.379	109.872	133.021	111.357	41.3443	249.174	68.8386	127.942	44.7892	201.792	193.087	104.53	83.5936	114.887	130.899	39.5839	86.8138	147.826	109.678	126.404	216.03	75.6714	58.3697	58.7455	53.3201	120.642	51.9731	122.553	72.2333	98.5372	255.383	64.4207	68.1692	208.125	119.705	103.279
ESI-	304.24	10.216	HMDB0001043	Arachidonic acid	C20H32O2	304.24	1	23.1638	25.6709	25.1717	29.8716	25.1617	23.8477	28.0668	28.1907	25.3729	23.9425	50.9377	32.4838	16.5411	17.6692	25.4907	32.2714	6.22885	10.7829	37.5797	34.7771	43.5238	16.2706	59.2463	19.9203	27.0247	22.1954	26.4621	9.11635	21.2895	15.201	48.9046	20.2996	34.3046	16.6225	22.171	15.0839	14.7289	24.5958	33.0195	17.5947	15.2956	31.5363
ESI-	308.271	11.424	HMDB0005060	Eicosadienoic acid	C20H36O2	308.272	1	4.52487	3.99274	4.67448	4.5619	3.62424	4.30432	3.46207	3.35539	7.2593	5.8775	7.82942	9.78853	6.62651	8.82305	9.27236	6.52974	8.69116	4.423	3.58622	17.3071	4.9819	4.54312	4.82436	5.88252	4.03753	5.90172	5.23041	2.81024	4.98324	3.53468	5.86439	3.78228	7.52904	9.61025	6.11597	2.53149	5.45882	6.5411	7.48122	6.39764	5.51759	4.65267
ESI-	309.106	0.827	HMDB0000230	N-Acetylneuraminic acid	C11H19NO9	309.106	1	118.817	103.682	76.464	80.868	116.55	128.066	129.699	95.984	145.653	79.1707	56.4055	151.012	83.4645	109.314	36.7708	98.494	237.158	132.708	204.632	172.523	123.852	105.976	119.091	100.201	115.475	132.407	78.3268	36.1337	77.3901	72.9422	119.653	66.3323	112.865	105.032	155.842	41.472	51.7537	117.351	126.862	134.336	142.951	89.4722
ESI-	310.287	12.402	HMDB0034296	11-Eicosenoic acid	C20H38O2	310.287	1	30.1785	31.62	34.6079	36.637	34.0227	33.7339	30.5625	29.0809	35.1173	28.5933	47.379	57.237	34.5364	60.4265	58.3748	31.7346	66.3342	15.3747	30.5073	53.2344	29.1035	30.5974	29.9069	40.6886	52.7188	28.5616	41.9348	24.1722	43.3963	29.5721	32.9635	31.8602	53.9903	50.3505	43.3036	23.391	46.4542	38.8276	48.0618	35.8327	38.3632	35.254
ESI-	311.171	4.303	HMDB0028879	Histidylarginine	C12H21N7O3	311.171	1	52.7195	59.247	61.9983	57.8519	62.8984	59.088	65.8287	59.4605	92.5495	59.1625	30.5833	72.4799	133.088	26.3081	148.554	120.271	54.5405	21.9049	149.707	55.9524	65.6758	26.568	40.1508	39.3958	100.842	87.4255	33.5999	124.907	19.4758	95.9164	177.175	126.559	53.2508	98.8978	105.021	130.147	89.9702	131.538	57.514	107.777	143.969	114.287
ESI-	312.176	11.876	HMDB0061027	2-hydroxyethinylestradiol	C20H24O3	312.173	10	691.889	760.505	887.522	1009.44	1014.07	969.07	1149.8	1138.67	501.574	968.67	745.101	491.419	506.037	855.919	893.396	876.109	1817.31	314.63	933.607	701.597	575.979	677.033	522.295	564.704	834.048	405.182	509.947	286.863	554.192	483.615	1446.73	859.599	1129.92	1376.71	1126.46	346.362	477.131	528.837	557.368	585.516	691.335	687.989
ESI-	312.23	6.919	HMDB0010201	12,13-DiHODE	C18H32O4	312.23	0	18.8871	20.5888	21.5237	21.3936	28.6607	21.4283	29.0531	21.6812	2.80558	22.0113	4.84477	2.76014	3.43642	3.28067	4.68733	29.6745	6.54218	12.69	19.0605	19.6649	24.533	22.0919	69.4636	21.4452	41.8903	2.65858	12.9921	6.14786	1.72841	14.6295	35.6449	25.526	24.9619	27.7417	39.567	23.991	25.3624	17.9697	35.7069	20.7343	30.5006	24.4838
ESI-	312.303	14.386	HMDB0002212	Arachidic acid	C20H40O2	312.303	0	156.774	162.788	174.762	177.275	184.91	172.333	173.91	160.067	158.554	154.547	152.391	132.196	93.3067	176.504	394.668	98.3711	229.163	80.4449	128.921	148.241	105.489	121.704	219.884	188.835	438.453	139.829	98.8844	145.902	122.08	140.33	145.332	167.058	187.801	140.845	133.243	101.455	120.354	131.45	164.368	98.3424	99.8855	159.957
ESI-	314.221	3.697	HMDB0001830	Progesterone	C21H30O2	314.225	13	6.78054	7.16463	8.65068	7.87706	7.7348	7.2322	8.25349	8.19278	0.727814	8.22459	0.462983	0.74106	0.360154	0.709321	0.679123	0.517345	1.01779	0.416298	0.496285	0.521717	0.623488	0.546802	0.535397	0.370031	0.551865	0.610285	0.399012	0.583341	0.646496	0.481993	0.369159	0.418157	0.525767	0.464731	0.466037	0.572226	0.533875	0.403173	0.378369	0.417209	0.596944	0.349608
ESI-	314.246	6.259	HMDB0004705	12,13-DHOME	C18H34O4	314.246	0	1.64053	1.86877	0.823583	1.63842	2.27581	1.85818	2.05909	2.29974	1.76196	1.88982	1.36938	2.14479	0.315757	1.16719	2.61536	2.28789	1.25763	0.971717	1.76141	2.28886	1.54763	1.55772	2.41284	2.62743	2.65672	1.12557	1.58588	0.937902	1.57463	1.09952	2.01278	1.17218	2.026	4.1888	1.7747	1.48053	1.93778	1.53091	2.48023	1.56325	1.42946	1.8982
ESI-	314.282	10.421	HMDB0061651	3-hydroxypristanic acid	C19H38O3	314.282	0	45.3211	57.7362	50.6128	59.7509	56.7938	53.8144	63.9188	70.2016	11.7788	53.3295	1.12876	4.88785	1.19918	25.0407	1.83442	3.32526	3.26939	7.69297	10.4149	12.5842	6.78159	11.538	10.9045	8.8888	17.1447	9.35287	3.10029	4.24922	7.30017	4.91556	92.1881	10.0126	10.3737	10.2225	6.80376	6.38186	7.34765	7.15254	8.2591	7.48623	9.94216	11.872
ESI-	316.261	7.221	HMDB0059633	(9S,10S)-9,10-dihydroxyoctadecanoate	C18H36O4	316.261	0	34.1093	35.7364	38.5612	36.2388	38.7169	36.4285	43.6076	40.1365	19.6841	38.4963	25.6029	15.957	17.169	28.8074	29.3295	41.8303	30.6907	26.85	36.0302	41.2841	27.2605	45.5022	151.529	35.793	50.6755	18.403	24.2609	20.5763	19.2037	24.9937	51.0199	38.8153	54.3093	43.8926	46.481	41.8973	29.3419	28.114	53.9247	37.7101	44.3389	44.1547
ESI-	320.147	3.658	HMDB0000901	Valproic acid glucuronide	C14H24O8	320.147	0	0.388357	0.254012	0.294876	0.496469	0.525315	0.448396	0.48148	0.655509	0.177106	0.380292	0.151755	0.17926	0.185093	0.165714	2.33316	0.172962	0.193356	0.205301	0.235692	0.19705	0.187664	0.18632	0.174113	0.161851	0.172505	0.161607	0.16264	0.171234	0.175336	0.153718	0.177439	0.159764	0.172169	0.1616	0.160742	0.148533	0.164831	0.151811	0.15457	0.164695	0.161892	0.163556
ESI-	324.042	4.711	HMDB0000288	Uridine 5'-monophosphate	C9H13N2O9P	324.036	18	1.26204	1.64675	1.65766	1.50729	1.29973	1.37856	1.49952	1.7331	0.185031	1.16512	0.171109	0.194892	0.165005	0.176433	0.176885	0.180951	0.21847	0.180243	0.184089	0.214094	0.177853	0.211108	0.193381	0.179935	0.180862	0.170951	0.174759	0.192353	0.205937	0.174238	0.183614	0.169435	0.1886	0.174378	0.184114	0.165973	0.185217	0.161443	0.163475	0.184808	0.17563	0.180467
ESI-	326.191	12.436	HMDB0059915	4-Dodecylbenzenesulfonic Acid	C18H30O3S	326.192	0	1089.21	1089.69	1163.65	1285.96	1303.02	1188.47	1408.29	1430.79	585.217	1357.42	782.295	612.956	554.47	928.347	1497.66	1288.29	1917.01	433.045	1008.26	1041.12	726.795	982.14	618.439	613.582	1186.42	550.367	538.234	249.053	632.219	493.035	1476.84	1116.97	1329.41	1677.21	1376.12	419.71	601.288	590.58	542.122	575.79	1031.31	838.555
ESI-	327.095	1.58	HMDB0010316	Acetaminophen glucuronide	C14H17NO8	327.095	0	0.659153	0.515873	0.473608	0.509678	0.463207	0.447216	0.462068	0.94159	0.504711	0.437708	0.467771	0.468931	171.191	0.462232	0.479703	0.444753	0.276626	0.414529	0.513666	0.541315	0.482048	0.45497	0.524724	0.490861	0.509297	0.439191	0.61682	0.478715	0.488236	0.535309	0.541807	0.508197	0.567602	0.510509	0.529274	0.458432	0.495343	0.482441	0.524196	0.54493	0.491317	0.514979
ESI-	328.24	10.036	HMDB0002183	Docosahexaenoic acid	C22H32O2	328.24	0	30.2921	36.0925	34.6778	35.1992	36.3145	34.586	35.9499	37.3305	37.9034	35.769	64.4035	36.0357	26.0873	28.2461	41.4353	35.7477	9.93543	17.1313	46.3702	39.0395	47.4219	19.504	85.8983	26.232	42.9797	37.3152	50.2766	14.9802	21.7614	22.1689	77.0953	33.99	71.4656	27.9572	26.7974	20.8982	22.8717	32.9834	41.4597	24.3152	21.5836	34.6249
ESI-	329.056	6.473	HMDB0000058	Cyclic AMP	C10H12N5O6P	329.053	11	2.2771	1.96534	0.228835	2.76073	0.239057	1.49695	0.961577	0.235726	0.143512	2.22533	0.134973	0.15063	0.12966	0.141629	0.13901	4.59931	0.175921	2.24787	0.162604	0.564186	0.611891	4.76296	0.15127	3.48744	0.359926	0.126721	0.170554	0.16058	0.182686	0.15347	2.75504	0.140575	0.275072	0.493232	0.175347	0.193671	0.164176	3.18337	3.66327	0.296179	0.600335	0.855885
ESI-	329.22	6.475	HMDB0013202	6-Keto-decanoylcarnitine	C17H31NO5	329.22	0	1828.22	1860.98	1909.99	1932.05	2084.43	1915.95	2052.69	2127.57	27.0596	2001.42	0.639085	0.998884	51.2111	32.0218	17.2106	6958.38	14.5569	1721.31	494.019	397.776	812.43	4200.88	212.447	5305.35	3915.15	28.6673	370.878	168.686	280.167	431.687	4055.67	254.196	2476.65	5917.4	652.249	1202.77	406.979	3330.31	2451.22	3300.11	8250.9	1198.59
ESI-	330.241	5.026	HMDB0004710	9,10,13-TriHOME	C18H34O5	330.241	0	211.433	98.1917	123.741	258.216	223.465	125.38	268.357	236.269	7.45686	259.418	4.87377	8.29385	3.87446	3.45377	6.25425	254.127	4.07717	118.495	230.223	218.881	116.258	195.732	655.945	193.879	325.008	4.04048	119.621	42.6151	66.5546	166.213	375.294	177.067	257.634	238.617	205.513	171.352	196.976	191.331	314.787	137.974	281.432	366.677
ESI-	330.277	10.502	HMDB0011564	MG(16:0/0:0/0:0)	C19H38O4	330.277	0	8.50524	12.9887	9.43933	15.7752	10.1006	19.3539	6.36122	10.4575	4.23575	10.6205	5.53134	13.4673	2.74329	0.957579	2.06558	8.38087	1.15065	1.50662	12.1411	20.015	5.87846	3.71872	9.87421	8.67977	15.5608	4.20014	6.85853	4.13154	6.72824	4.34845	141.892	20.4401	19.2267	2.58725	15.7303	3.39831	5.33958	5.55869	20.7858	15.4949	5.81893	20.6451
ESI-	340.207	13.06	HMDB0003033	Canrenone	C22H28O3	340.204	9	847.462	805.731	628.336	1008.97	965.586	928.61	1103.17	1090.68	471.536	1091.22	722.421	535.894	579.868	716.241	1231.85	988.088	1314.08	329.911	1193.29	856.525	730.196	752.563	509.193	454.563	960.402	361.22	530.309	244.416	338.329	493.459	1022.86	626.52	1062.04	1250.61	1199.26	441.288	452.062	505.016	505.224	595.552	889.33	559.371
ESI-	346.212	9.738	HMDB0001547	Corticosterone	C21H30O4	346.214	8	3.23199	3.60787	3.50379	3.51936	3.55757	3.72321	3.39985	3.35822	3.27906	3.56655	5.15249	5.60987	3.32322	7.45446	10.2191	2.17713	9.0393	2.33134	2.3729	4.08446	2.35318	2.75434	5.08527	3.61146	9.471	2.67308	4.23262	2.95442	3.36057	2.20743	3.04974	3.7959	9.1799	3.07269	3.31187	1.88126	2.80135	2.27239	4.68752	1.54338	2.39148	3.01862
ESI-	352.259	12.269	HMDB0011569	MG(18:3(6Z,9Z,12Z)/0:0/0:0)	C21H36O4	352.261	8	91.8482	87.3136	119.813	85.1967	112.616	84.3946	65.357	75.6464	80.8351	66.5666	90.7509	91.6269	87.721	82.1611	80.9094	72.9359	124.444	57.1243	77.1702	73.0322	77.6361	84.0793	80.9808	86.1291	106.427	73.1317	81.1369	99.5047	111.714	90.8668	93.6794	99.795	102.53	98.2915	80.2274	105.994	97.2151	79.6316	76.9776	102.908	108.282	82.1205
ESI-	366.143	1.609	HMDB0240296	Tryptophan 2-C-mannoside	C17H22N2O7	366.143	1	20.0934	23.1	25.9947	19.7893	21.8923	22.5218	21.9558	22.8679	44.7052	21.0902	17.3942	31.6792	23.8891	18.9834	14.2816	23.0744	10.2354	19.6229	27.7898	23.0108	39.2816	17.3009	26.6738	19.9472	33.6293	37.841	25.7147	16.3286	14.0593	14.9051	19.8988	13.8668	25.1271	26.109	18.4738	14.059	16.0531	16.1801	27.5569	26.3381	20.9615	16.7124
ESI-	368.166	5.012	HMDB0002833	Testosterone sulfate	C19H28O5S	368.166	0	3.04453	3.76304	3.95342	4.18663	4.42462	3.6405	4.34329	4.25439	1.01619	4.51231	8.09406	2.81561	4.41672	1.02596	6.58044	0.254236	0.322345	1.15106	0.289614	2.81135	4.14071	0.293066	13.0938	1.89539	1.14223	0.683387	0.279861	0.28028	2.10082	1.45858	25.4195	0.865806	13.6695	1.51137	2.16668	0.742951	4.00853	5.49271	18.1429	1.64273	1.51898	11.1444
ESI-	368.365	14.182	HMDB0002003	Lignoceric acid	C24H48O2	368.365	1	62.3848	54.5815	73.2853	73.898	65.2439	69.8114	45.0338	43.9092	56.6522	64.2883	49.4082	81.5378	71.0168	57.9713	51.6792	63.6656	133.49	44.6836	47.1529	65.9312	48.614	84.2769	55.9961	37.0839	51.6167	52.9	45.207	64.6613	61.8328	49.8343	52.7993	49.2555	68.3984	54.3616	85.8907	90.6548	70.4908	62.9221	61.093	78.8206	64.0673	68.9931
ESI-	376.137	1.957	HMDB0000244	Riboflavin	C17H20N4O6	376.138	4	0.588598	0.453572	0.467415	1.07723	0.489249	0.58187	0.486242	0.486682	0.441851	0.874453	1.01303	0.445362	0.417856	0.45202	0.410472	0.416927	0.770654	0.432411	0.451427	0.50396	1.47094	0.501868	0.42048	0.442309	0.45581	0.440202	0.36408	0.49261	0.505185	0.384474	0.414518	0.318875	0.513291	0.464406	0.456186	0.417801	0.375997	0.36173	0.572553	0.389233	0.357334	0.431133
ESI-	378.28	10.505	HMDB0004666	2-Arachidonyl-glycerol	C23H38O4	378.277	8	6.22594	7.44123	7.91596	6.3484	10.3354	9.5114	7.41921	11.122	10.7064	12.4172	10.4523	28.9522	8.24867	4.12187	5.56881	11.4248	3.25102	4.07182	39.52	42.2869	12.5255	9.06753	20.0802	12.7755	36.4091	8.1522	5.3755	2.57931	6.18506	5.42568	22.6065	22.2474	27.6515	2.83775	16.6395	5.20819	6.12381	3.30667	24.0367	17.6607	5.88584	35.6822
ESI-	383.108	1.689	HMDB0000912	Succinyladenosine	C14H17N5O8	383.108	0	88.1034	103.542	99.9636	102.54	100.688	105.904	93.6306	99.3906	141.815	92.7213	85.3795	98.9593	98.9716	110.187	63.0907	119.383	58.4549	83.9574	116.855	139.175	143.296	91.3035	104.177	87.5737	134.261	135.824	80.4263	51.6429	85.7245	94.2561	72.0298	56.0181	121.989	107.725	76.9712	54.4947	74.3146	84.5884	119.34	105.56	94.8419	83.4471
ESI-	392.293	7.101	HMDB0000626	Deoxycholic Acid	C24H40O4	392.293	0	6.28488	5.49757	6.2073	5.56779	6.35448	6.2526	5.80926	6.00126	4.93064	5.04354	3.44276	1.69422	1.96602	4.54153	1.51742	4.63598	0.715484	0.599269	0.549267	0.64322	18.7678	2.46922	22.3128	2.66362	1.38635	4.56758	0.570008	3.85216	4.30606	5.31538	3.00548	0.933756	12.1972	1.46516	1.82796	0.57107	1.85983	1.15867	7.04819	7.40837	7.56718	4.15696
ESI-	394.109	5.891	HMDB0059759	1-Hydroxypyrene glucuronide	C22H18O7	394.105	8	3.23252	3.03962	2.60946	2.42961	2.98708	2.76676	2.37689	2.07614	2.71842	1.97937	4.03669	2.7841	3.27113	4.40243	3.24116	3.94593	4.88677	6.53202	7.75109	2.87641	6.36988	7.09661	7.16161	5.35868	5.65104	2.08114	5.98655	3.99187	4.95797	4.98463	8.52001	8.35985	3.23473	2.16163	5.51695	5.17772	6.9946	5.43172	3.72025	7.79141	5.49132	7.98209
ESI-	398.166	13.054	HMDB0060898	Eletriptan N-oxide	C22H26N2O3S	398.166	2	63.2916	68.6105	72.4059	68.4396	65.879	68.4164	84.831	80.9089	38.0463	60.8573	47.1993	38.5702	37.7625	52.8402	92.4117	82.4488	118.195	26.3105	70.2813	67.4952	55.4099	56.4485	36.8424	39.5032	61.1052	34.1001	32.1133	17.7514	31.433	39.3831	82.5525	53.5085	88.8233	90.9092	63.5688	26.9739	34.4433	43.6069	43.9123	44.5857	63.969	48.8307
ESI-	399.335	9.466	HMDB0000222	Palmitoylcarnitine	C23H45NO4	399.335	1	10.6678	12.1168	12.419	11.4189	12.251	12.2717	14.5181	13.9917	12.5544	13.0779	28.7042	27.503	17.0156	22.7819	45.8058	17.886	28.1283	21.0592	27.111	25.7815	17.2255	22.1296	15.717	20.414	27.7072	12.4668	21.3396	5.49651	20.2494	16.1574	18.2716	11.861	26.87	17.1626	17.2637	10.9339	27.5686	17.0027	21.2335	16.2725	20.2936	25.8961
ESI-	416.325	6.196	HMDB0060425	7a,25-Dihydroxycholestenone	C27H44O3	416.329	10	6.14539	6.10062	6.1973	5.97093	6.75895	6.81812	7.16789	6.9659	7.28507	6.56335	7.13259	6.44796	6.24317	8.80535	9.5442	6.46555	17.4039	6.2094	6.19618	7.21091	7.03704	6.58775	6.35273	6.93688	6.04716	6.33202	6.17672	4.5477	5.33956	4.06095	5.58304	5.60737	6.98848	6.66345	6.11764	4.93885	5.48662	5.42575	6.64829	5.65471	5.33894	5.80781
ESI-	425.253	5.331	HMDB0011500	LPE (14:0/0:0)	C19H40NO7P	425.254	2	40521.8	39758.5	43396.7	43158.8	47871.4	46587.5	47811.7	48684.8	49618	44674.2	54148.2	50375.3	60856.6	62801.9	60844	48677.2	82441	51508.7	28614.9	23895.1	45397.3	45783.6	48197.2	53148.8	35088	51918.8	34636.2	43430.8	44003.1	37632.7	29824	25363	36927.3	40455	38748.1	39244.5	40549	41750.6	20271.1	38497.9	40973.5	23107.8
ESI-	430.308	7.929	HMDB0011590	MG(24:6)	C27H42O4	430.308	0	55.2055	56.4259	64.1601	55.7587	62.8985	60.821	62.348	62.6947	64.2185	56.1595	103.649	33.5529	57.1254	64.0574	84.2878	74.9192	9.39805	40.56	78.196	52.0041	85.3033	38.0027	147.455	51.7043	51.5038	62.4209	76.8663	18.2148	21.3867	33.7053	134.631	36.179	78.822	32.6457	37.5551	28.4256	27.647	65.0959	65.8282	34.1725	39.2285	41.1515
ESI-	439.27	5.871	HMDB0011502	LysoPE(15:0/0:0)	C20H42NO7P	439.27	0	235.368	242.254	250.177	222.705	245.612	248.949	255.238	261.651	347.434	253.943	238.773	117.273	296.866	331.07	286.187	166.303	506.748	358.2	53.4923	30.037	208.691	407.986	243.239	333.962	96.576	314.499	182.562	234.315	270.281	231.889	79.8399	60.9956	120.007	300.203	145.326	261.848	292.222	258.001	49.1631	165.291	282.735	36.9214
ESI-	441.129	4.303	HMDB0000121	Folic acid	C19H19N7O6	441.14	24	2.61416	2.92396	2.99401	2.83902	2.71417	2.75856	2.66503	3.13634	4.02172	3.0145	1.45417	3.97044	7.00645	1.24983	8.20127	6.12852	3.14131	1.02184	7.48312	2.59513	3.43884	1.22933	1.72083	1.72075	4.86737	3.88981	1.13018	6.09553	1.0472	4.23139	9.45425	7.4197	2.86697	5.24454	6.36182	6.30883	4.615	6.94595	3.27205	5.90597	7.76507	6.12796
ESI-	443.012	1.579	HMDB0001201	Guanosine diphosphate	C10H15N5O11P2	443.024	27	0.265626	0.276578	0.253919	0.262432	0.248343	0.239769	0.247732	0.261104	0.279667	0.253553	0.250789	0.251411	16.3427	0.24782	0.257187	0.242983	0.148309	0.222245	0.275395	0.316909	0.258444	0.243926	0.281324	0.263169	0.278906	0.235467	0.3307	0.256657	0.261762	0.286999	0.290483	0.272463	0.304313	0.273703	0.283763	0.245783	0.265572	0.258655	0.281041	0.292157	0.263413	0.276099
ESI-	444.153	2.779	HMDB0014399	Doxycycline	C22H24N2O8	444.153	1	1.84431	1.82952	2.04407	1.88816	1.90358	1.98604	2.18554	2.0407	0.152375	1.85854	0.177885	0.161626	0.162031	0.150573	103.77	0.155597	0.176106	0.144171	0.15622	0.177926	0.168692	0.175607	0.164815	0.149703	0.157695	0.143395	0.144383	0.152153	0.16682	0.144155	0.150028	0.265839	0.167941	0.145804	0.150051	0.13944	0.150337	0.142206	0.139407	0.170206	0.143525	0.154479
ESI-	444.32	4.598	HMDB0011560	MG(24:6)	C28H44O4	444.324	9	1.63704	1.24939	1.2667	1.15955	1.31691	1.20339	1.37296	1.76316	4.34248	1.42869	0.191411	0.228679	5.65543	0.20031	3.47829	6.42349	0.437861	0.21362	4.16961	0.236871	0.684931	0.236491	0.243513	0.29813	1.98014	3.7162	0.199897	9.53619	0.232459	1.90078	6.61617	4.09372	0.668581	2.16693	2.17086	6.17583	1.84238	4.00237	1.80283	4.10754	4.85412	2.08449
ESI-	449.314	5.574	HMDB0000708	Glycoursodeoxycholic acid	C26H43NO5	449.314	0	3.02918	3.2605	3.42748	3.12325	2.99631	3.0603	3.77752	3.60757	1.08412	3.13455	3.02364	3.2083	17.2408	1.90566	0.278591	2.73589	0.303676	4.54326	6.15566	2.69192	11.3505	1.43559	11.8358	1.1865	0.862233	0.826348	3.13006	0.908039	0.569331	1.93416	1.57524	2.14663	10.1261	1.27684	2.06419	0.756271	1.08984	5.23893	2.97209	1.59465	0.572048	3.78755
ESI-	453.285	6.425	HMDB0011503	GPE(16:0)	C21H44NO7P	453.286	1	266.56	274.028	303.698	286.459	289.162	288.31	308.564	319.265	412.387	290.306	285.395	154.758	378.698	389.469	331.184	200.76	605.977	436.216	62.4257	41.6126	262.25	484.629	325.137	391.208	120.126	375.309	223.959	271.193	336.762	292.696	100.809	68.1835	152.622	366.176	173.118	291.818	322.173	333.176	65.4616	198.925	339.556	53.2805
ESI-	454.293	5.489	HMDB0001850	Verapamil	C27H38N2O4	454.283	22	1.32583	1.78833	1.92976	1.40599	1.75234	1.44465	1.78956	1.81849	0.49637	1.35725	0.302848	0.178125	1.54844	2.32007	0.171967	0.854057	0.248217	1.26612	0.649193	0.619391	5.81034	0.933553	2.92896	0.478598	0.458303	0.420291	3.61546	0.447567	0.732432	2.62079	0.615776	0.684956	7.14435	0.450658	0.436323	0.446834	0.288304	0.413991	0.519863	1.18626	0.630448	1.99731
ESI-	465.322	9.233	HMDB0000138	Glycocholic acid	C26H43NO6	465.309	27	33.1075	34.0106	35.4968	36.4565	39.5214	35.5651	39.9125	40.9923	61.2916	43.443	34.9244	86.2323	26.3694	14.2011	9.96016	73.5564	4.61769	15.2731	94.1267	86.0944	94.9523	14.8224	98.6038	42.7681	101.223	65.5293	34.1649	14.4684	11.9618	12.256	68.5591	42.0041	75.7497	24.0641	40.7548	14.7819	21.92	29.0534	59.2824	50.7049	26.6606	71.9876
ESI-	468.952	0.826	HMDB0060640	Lamivudine-triphosphate	C8H14N3O12P3S	468.951	2	38.4748	37.7059	43.501	34.2501	37.884	24.1503	23.6602	41.0798	37.2343	31.2617	43.4881	94.7043	19.9697	18.5612	28.5646	43.7588	38.8808	26.4865	95.633	170.673	36.461	62.9037	48.9712	26.4278	97.1446	27.8474	6.86872	26.5284	46.6056	7.38304	69.8338	84.0803	83.7417	6.35021	64.0777	14.9485	28.5232	14.0957	94.6593	59.4986	25.7268	103.162
ESI-	476.25	5.347	HMDB0003141	Retinoyl b-glucuronide	C26H36O8	476.241	18	436.403	413.065	517.203	506.9	565.583	488.26	440.311	535.702	492.875	529.098	646.292	745.738	550.603	578.278	625.041	649.413	599.629	516.268	503.868	502.91	533.395	590.199	574.631	519.804	574.176	476.072	392.127	422.647	382.145	419.8	444.466	376.595	467.747	473.9	475.873	432.946	471.241	347.724	400.719	499.316	463.135	418.251
ESI-	476.314	7.927	HMDB0038497	Polyporusterone C	C28H44O6	476.314	0	28.449	29.0592	32.4122	29.5502	31.9413	31.0285	31.7692	32.5052	32.2686	28.441	52.7394	18.3083	28.7626	32.91	45.0041	39.4522	5.46999	20.5635	37.9804	25.5652	45.1871	18.7389	78.8108	26.04	26.6945	31.6568	39.936	10.2824	11.8163	17.4953	72.5182	19.008	42.8847	16.8157	19.5874	14.9465	15.1556	33.905	36.9227	17.2952	21.5078	20.9542
ESI-	479.301	7.91	HMDB0011505	LPE(18:1)	C23H46NO7P	479.301	0	4.89007	5.42944	5.66378	5.96969	5.0045	5.66928	5.71515	6.36521	10.3679	5.65074	4.94638	11.056	3.92262	3.19545	1.90081	7.88503	0.449087	2.57887	7.93357	5.82017	10.2852	2.31754	11.8464	6.22966	10.6895	9.18897	5.5767	2.3269	2.61076	1.93193	5.21082	3.90442	9.4822	4.11012	8.04814	2.4148	3.2478	4.95503	5.17107	6.27138	5.01192	6.11309
ESI-	481.317	7.621	HMDB0010381	LPC(15:0)	C23H48NO7P	481.317	1	333.554	358.333	385.551	358.259	395.343	377.849	396.992	415.347	720.833	407.677	561.537	586.894	332.755	184.702	246.316	710.201	43.7911	187.515	364.181	220.97	908.586	225.075	933.947	465.388	548.741	671.958	440.132	187.501	159.666	196.24	520.018	261.333	595.18	321.376	482.367	254.272	243.164	306.816	341.939	446.777	330.498	309.089
ESI-	482.981	0.809	HMDB0000082	Cytidine triphosphate	C9H16N3O14P3	482.985	6	7.07777	2.85303	2.4379	2.73456	4.32832	2.58921	2.33821	5.04034	3.01014	2.56424	2.55333	2.76115	5.42658	2.57772	2.17913	2.85521	13.9644	2.51	3.28555	3.5438	2.94222	2.93361	6.02424	2.71858	2.75543	3.49698	2.71725	2.89432	3.04501	2.92071	2.9071	2.67642	2.94111	2.51213	4.54039	2.60056	2.80691	3.36705	3.1819	3.27713	2.70322	2.93792
ESI-	492.348	12.088	HMDB0033907	Homodolicholide	C29H48O6	492.345	6	174.906	201.205	137.94	188.898	229.834	206.035	200.972	108.127	203.479	208.896	195.002	144.516	155.912	147.97	195.356	165.037	335.202	167.582	182.311	192.489	454.71	167.45	177.851	161.088	163.971	117.943	2.72276	207.067	133.326	132.163	169.934	219.187	234.563	155.061	172.644	145.139	219.409	203.974	171.138	173.734	194.333	198.963
ESI-	499.291	5.87	HMDB0000874	Tauroursodeoxycholic acid	C26H45NO6S	499.297	12	232.073	239.131	246.854	219.348	242.066	245.419	251.795	257.959	343.001	250.562	235.374	115.882	292.622	326.522	282.477	163.951	500.284	352.902	52.9232	29.7853	206.057	402.729	240.091	329.071	95.5173	310.773	180.116	231.053	267.189	228.553	79.0938	60.6961	118.595	296.815	143.323	258.516	288.442	254.755	48.6053	162.959	278.794	36.5869
ESI-	501.286	7.179	HMDB0011517	LPE(20:4)	C25H44NO7P	501.286	0	5.85886	6.91826	6.42483	5.72551	6.65714	6.71945	7.16513	7.25261	12.2024	6.92137	6.58699	11.257	3.92919	3.62137	1.97278	8.84711	0.611165	2.23464	8.79135	7.02892	13.1403	2.48024	16.1839	8.86029	12.5002	12.0488	5.28567	2.62453	2.87278	3.02329	9.44653	5.17338	10.4335	5.0728	7.92229	3.10188	4.2418	5.73495	6.46612	7.89518	6.17788	8.35185
ESI-	515.291	4.347	HMDB0010389	LPC(18:4)	C26H46NO7P	515.301	1	0.683835	0.731155	0.953808	0.553849	0.503866	0.49604	0.545416	0.485329	0.607688	0.486461	0.398632	0.996095	58.6246	0.447646	0.637853	0.543941	0.581431	0.479637	0.604768	0.417726	0.798402	0.548192	0.496189	0.515402	0.498608	0.545188	0.452561	0.636009	0.475148	0.532867	0.67822	0.555496	3.15295	0.570888	1.71145	0.577913	0.533802	0.584685	0.613077	0.518394	0.631658	0.476083
ESI-	525.273	3.886	HMDB0011526	LPE(22:6)	C27H44NO7P	525.286	23	28.4061	29.468	31	30.1169	31.1525	30.9889	30.6076	24.634	40.3984	30.7303	32.1905	13.8714	39.8634	40.4456	34.49	21.9473	40.249	42.929	9.58261	5.25121	24.2782	46.2262	32.6256	41.302	12.4425	41.5079	19.715	20.024	29.534	30.127	11.2444	8.70832	16.6377	39.3878	20.0315	33.3807	35.5717	32.3486	6.95954	16.5139	37.7411	6.87742
ESI-	529.302	5.331	HMDB0011523	LPE(22:4)	C27H48NO7P	529.317	29	76.7695	86.0861	92.7948	102.026	142.566	121.12	96.4973	238.495	111.039	100.19	100.914	95.6626	102.849	119.93	125.088	101.694	155.122	111.735	78.7461	59.9676	89.8103	126.923	92.2904	105.68	78.9658	119.186	77.5279	89.516	85.8128	77.3195	68.6746	63.9299	74.1546	89.0816	76.9039	80.1326	91.3982	92.4138	58.1043	77.0011	88.7272	54.1928
ESI-	584.264	4.152	HMDB0000054	Bilirubin	C33H36N4O6	584.263	1	2.86466	3.13682	2.79613	3.39086	2.88389	2.87453	3.76523	3.21864	1.81369	3.26852	3.61751	1.16697	2.34187	3.81913	9.70532	3.5955	0.518875	1.67758	5.27374	3.43712	3.01469	2.089	6.10005	1.81302	1.13621	1.54606	2.75739	0.225659	1.29446	2.57596	6.17793	1.57969	2.68378	1.28899	1.33249	2.57209	0.619475	4.08426	4.69604	1.85588	0.906069	1.84247
ESI-	593.573	0.904	HMDB0004951	Cer(d18:1/20:0)	C38H75NO3	593.575	3	107.802	130.298	94.9987	139.439	95.6587	125.155	83.9833	112.068	118.2	105.094	62.3074	122.574	43.3458	115.002	79.6571	88.5663	2.89148	23.8497	64.8277	69.0164	47.2642	130.922	70.9979	96.619	122.496	95.795	172.322	142.189	140.682	127.833	142.198	154.181	154.005	155.531	99.9509	93.3294	177.21	121.629	50.7298	137.074	146.677	129.996
ESI-	600.46	10.22	HMDB0007085	DAG(35:5)	C38H64O5	600.475	26	14.3073	21.2048	13.6561	18.5113	18.2654	16.4369	14.9474	15.371	19.3396	14.9651	33.791	27.7756	12.3931	21.8359	32.9085	16.2889	29.9626	13.6288	11.8335	42.9856	13.1202	13.4713	13.0656	21.3469	12.5344	16.4952	14.4749	10.701	19.2038	10.9	16.6762	11.2832	29.0364	45.5325	25.1613	15.4233	18.5255	25.1153	20.8462	15.6153	20.1118	14.237
ESI-	622.254	5.134	HMDB0038586	O-Methylsomniferine	C37H38N2O7	622.268	22	14.997	11.434	18.0659	16.29	18.5794	19.4584	19.6144	10.5886	4.25748	17.12	21.7054	31.7606	24.1148	29.7442	28.8586	25.0067	25.3897	19.433	18.4823	15.5184	20.7215	14.2319	17.8069	10.5235	21.0598	17.6479	9.50103	14.7184	10.731	7.5731	17.9317	16.6497	18.2071	24.0511	17.6995	12.0912	15.9387	9.31845	15.1866	16.9748	10.0891	15.8545
ESI-	622.552	0.916	HMDB0007160	DG(18:0/18:1(9Z)/0:0)	C39H74O5	622.554	2	203.021	196.179	168.952	160.737	171.477	167.443	152.526	172.787	145.568	158.106	114.74	177.792	128.445	158.647	145.932	135.975	3.5764	118.776	145.469	171.045	154.21	156.485	163.948	178.141	150.805	127.081	216.535	263.819	193.513	272.532	223.314	230.579	203.071	158.162	229.898	234.085	207.582	197.948	157.422	214.487	195.75	206.001
ESI-	625.312	7.967	HMDB0001198	Leukotriene C4	C30H47N3O9S	625.303	14	9.81122	9.55195	12.776	13.0983	11.1698	11.8864	13.6974	13.5604	21.8814	12.0408	15.558	19.0365	10.246	4.53332	6.36828	22.0958	0.717072	5.01619	11.3455	8.18299	26.8753	4.90759	31.1373	15.8407	19.4559	21.9492	13.787	5.03729	3.8796	5.38133	14.8153	7.85224	19.0897	10.0601	15.0773	7.4267	7.43746	8.62693	10.9434	15.2572	10.8254	8.87819
ESI-	630.539	0.905	HMDB0007089	DAG(37:4)	C40H70O5	630.522	27	34.6918	37.8997	36.4938	44.9118	33.5498	37.7113	31.5163	37.0007	22.6348	20.1534	16.9726	35.9942	19.7399	27.1465	30.1363	21.5027	1.95132	25.3738	38.8915	43.518	29.7196	21.2295	29.0378	27.4351	19.3319	28.6823	40.478	25.0835	28.7316	51.7098	38.1155	40.3672	29.548	43.4748	52.6135	39.8063	37.6411	46.5315	26.8442	30.925	22.8342	23.2406
ESI-	652.628	0.894	HMDB0010368	CE(18:0)	C45H80O2	652.616	19	10.1954	3.4096	8.03981	5.68559	8.72097	7.98162	8.53417	2.6166	7.58077	6.97088	1.4937	5.58768	5.56547	7.8859	9.36855	4.36016	1.06478	5.00006	2.28377	6.28697	5.68325	5.08791	2.24604	1.58595	4.92854	5.62492	5.9731	12.3628	6.50449	20.1453	8.81393	14.5	7.099	9.99923	9.82447	4.71789	11.9374	9.62656	15.032	7.85407	8.41842	17.3192
ESI-	659.444	6.473	HMDB0008858	PE(14:1(9Z)/16:1(9Z))	C35H66NO8P	659.453	13	4.45782	4.65559	4.70552	4.4836	4.84132	4.14621	4.7861	5.02265	0.122269	4.4012	0.115379	0.128764	0.110838	0.12107	0.118831	45.6912	0.150383	3.46431	0.139	0.149986	0.565007	19.0788	0.129311	32.264	19.1864	0.108326	0.145795	0.13727	0.142596	0.131192	22.8439	0.120168	8.31849	44.7422	0.371958	1.80772	0.140344	15.3984	9.27408	11.8912	73.2303	1.50805
ESI-	675.518	0.877	HMDB0011368	GPE(18:1/14:0)	C37H74NO7P	675.52	3	1364.25	1144.96	1277.71	1327.12	1157.77	1166.77	1126.11	1118.04	135.939	1074.61	121.006	1293.91	905.497	957.59	1035.7	867.909	250.739	969.98	1060.73	1330.72	1084.47	610.182	1255.21	1123.82	1059.31	940.226	1060.76	1359.99	1224.61	1518.98	1141	276.459	81.2923	1454.1	1400.37	1578.39	757.005	1246.21	1071.11	1446.18	1314.73	1119.86
ESI-	677.515	0.861	HMDB0007866	PC(14:0/14:0)	C36H72NO8P	677.5	23	1091.69	1058.98	1062.61	939.149	987.161	879.381	1003.43	866.528	1010.52	914.127	709.257	1060.99	922.864	1015.86	886.249	888.692	82.4384	472.043	904.889	1095.37	1036.64	273.561	1023.46	977.118	1060.43	776.491	1210.29	1126.17	622.453	1236.07	1171.96	1131.41	997.762	1139.21	1133.88	1191.88	1209.3	1023.5	71.9397	1109.57	1092.21	1036.95
ESI-	695.486	0.861	HMDB0009213	PE(18:4)	C39H70NO7P	695.489	4	95.2222	75.8273	98.5523	72.6709	125.87	53.5666	57.0345	88.9313	87.8707	88.5755	82.4231	65.3123	76.576	62.7679	87.1526	71.0811	8.55024	92.8991	76.9168	27.32	102.07	69.3615	68.997	102.859	71.5969	68.1541	73.2114	128.777	99.4976	106.988	106.41	79.6284	87.0127	107.135	40.7878	117.636	113.437	106.599	88.8937	103.358	106.705	97.3285
ESI-	707.493	0.902	HMDB0012352	PS(16:0/14:0)	C36H70NO10P	707.474	24	79.32	99.4444	73.6131	70.9332	50.0678	72.8458	64.7597	48.5509	61.2674	53.6622	33.8097	47.6479	38.3963	49.7759	18.7241	51.3167	2.02672	61.0713	68.5055	61.3107	72.2868	59.2526	61.9325	64.4586	70.3853	62.9434	87.6903	91.9579	75.312	110.098	101.277	84.7915	79.8337	98.7427	49.6556	125.641	101.57	63.1677	48.1129	110.206	78.467	58.9263
ESI-	731.571	0.848	HMDB0011373	GPE(18:1/18:0)	C41H82NO7P	731.583	17	13.2837	13.2282	12.5339	11.6055	14.0121	12.0835	15.0888	10.9619	14.4495	15.022	19.6037	14.7508	8.61682	10.6878	15.2874	8.18427	1.45202	3.98417	8.26785	11.1651	13.0817	8.72243	11.7826	14.6812	15.0842	11.7173	18.464	10.8128	6.65041	13.3791	13.3831	19.1546	10.5787	15.9471	11.2602	19.4424	12.13	12.4862	14.0472	12.4382	20.3194	12.7219
ESI-	759.615	0.831	HMDB0009510	PE(22:0)	C43H86NO7P	759.614	1	20.434	20.884	21.8236	19.5555	20.8915	20.6217	19.3015	21.814	25.196	18.4676	23.9969	18.479	23.4683	17.6661	20.0275	21.2831	2.79254	11.8722	21.6852	27.3882	17.2593	19.7552	26.9677	19.0036	18.9653	21.3739	24.1778	18.2394	20.0959	27.6224	29.8356	28.7591	23.8921	17.6487	22.0411	21.2582	19.3001	20.5401	22.6196	16.4604	16.3675	25.6275
ESI-	787.646	1.71	HMDB0009511	PE(22:0)	C45H90NO7P	787.645	1	0.415672	0.430975	0.433959	0.414042	0.431069	0.41408	0.433713	0.442639	0.423131	0.424884	0.409873	0.422223	0.378311	0.395472	0.41486	0.42471	0.254255	0.362864	0.456204	0.575011	0.463323	0.388892	0.480023	0.436529	0.475319	0.395306	0.519094	0.390562	0.439629	1.07843	0.503789	0.416445	0.488086	22.8248	0.484835	0.450734	0.43541	0.398596	0.448984	0.454707	0.469057	0.477502
ESI-	798.425	0.894	HMDB0013488	PGP(32:2)	C38H72O13P2	798.445	24	108.778	503.853	483.492	475.698	490.239	470.408	548.332	22.641	457.204	121.708	368.541	482.622	59.1494	471.842	422.38	429.779	115.543	365.855	519.785	557.453	496.664	253.675	63.8769	464.433	473.239	71.9551	87.7585	555.769	189.541	638.736	140.345	556.945	579.998	585.068	501.742	645.459	591.182	477.342	426.116	100.555	554.905	484.538
ESI-	808.532	8.041	HMDB0009797	PI(16:1(9Z)/16:0)	C41H77O13P	808.51	27	1.11	0.84653	1.14243	1.12123	1.26875	0.505858	0.532244	0.710577	0.547838	1.41864	0.4704	0.568714	0.454596	0.459827	0.481826	0.495059	0.570512	0.478194	0.537525	0.586683	0.540287	0.565439	0.618169	0.492409	0.563106	0.483827	0.557009	0.557596	0.562404	0.498715	0.680483	0.487908	0.540906	0.533297	0.598651	0.482082	0.55316	0.470599	0.494118	0.517076	0.48363	0.519199
ESI-	866.574	8.639	HMDB0009785	PI(16:0/20:0)	C45H87O13P	866.588	17	2.07715	1.11739	1.50161	1.9131	1.43943	1.42294	2.22001	1.925	0.36926	1.27271	0.313423	0.378558	0.321037	0.326529	0.377243	0.320951	0.380145	0.327774	0.424021	0.529637	0.350691	0.422066	0.437129	0.348117	0.402331	0.327385	0.366299	0.401924	0.41222	0.348622	0.672741	0.420762	0.448085	0.36148	0.426792	0.342383	0.392615	0.351333	0.39251	0.350876	0.332261	0.422534
ESI-	915.52	5.182	HMDB0034108	Tylosin	C46H77NO17	915.519	1	113.464	118.638	131.446	129.83	148.294	136.68	149.106	141.298	168.093	138.112	148.423	86.1013	174.765	191.743	169.583	116.101	191.779	157.821	42.1873	18.7314	131.733	175.116	145.09	166.811	75.7485	160.029	113.402	90.807	89.5596	108.429	61.0401	45.0531	79.5242	128.822	116.163	121.502	126.843	121.632	33.071	110.699	79.7472	25.1977
ESI-	916.516	5.307	HMDB0009924	PIP(16:0/18:1(11Z))	C43H82O16P2	916.508	9	74.3246	69.8683	109.325	83.2337	97.4023	83.8906	89.2965	87.6734	90.228	90.1169	111.699	135.659	93.7648	116.6	123.772	117.434	122.174	61.5111	85.9571	66.7484	91.9401	109.71	90.5951	102.355	100.956	88.2474	68.3654	67.3311	67.0707	68.2487	70.5684	62.2133	48.4399	73.1865	81.7484	71.3779	75.6321	69.9396	60.2519	75.6486	69.5417	65.3171
ESI+	75.0691	0.806	HMDB0000925	Trimethylamine N-oxide	C3H9NO	75.0684	10	29.9831	30.0998	31.0755	23.7239	27.9371	22.3632	32.8205	29.9215	32.66	29.8513	18.1175	35.3753	18.0255	26.7486	13.8899	21.5337	14.1725	98.2989	34.4643	29.737	15.4205	20.2009	48.1733	29.6401	18.8443	21.8952	44.5579	14.0521	19.1447	20.1709	28.3461	24.4469	32.9898	8.94829	54.3315	7.28597	32.6781	7.85618	32.8735	92.1533	14.3986	29.0053
ESI+	89.0482	0.88	HMDB0000161	L-Alanine	C3H7NO2	89.0477	6	103.133	94.5874	99.4437	93.4855	85.6324	81.9548	79.318	84.4676	92.1773	126.186	180.166	163.507	126.591	125.841	157.966	144.128	103.96	93.6747	105.135	121.26	147.685	114.215	152.931	121.519	159.663	142.503	101.129	111.717	80.2285	98.3288	107.191	68.6971	144.297	76.03	83.1617	115.786	116.686	96.2223	115.974	116.016	101.561	100.578
ESI+	96.9839	14.49	HMDB0034830	Amidosulfonic acid	H3NO3S	96.9834	5	267.251	186.983	229.92	152.936	175.614	134.03	142.448	125.938	135.857	188	167.066	383.909	114.58	204.028	135.005	176.103	186.39	136.823	152.248	242.908	127.963	204.228	371.143	174.637	462.104	182.31	158.529	125.052	167.427	149.189	238.855	104.178	362.929	148.111	95.4818	212.176	120.93	150.298	257.236	232.279	161.73	211.483
ESI+	97.9681	14.497	HMDB0001448	Sulfate	H2O4S	97.9674		205.272	142.28	146.737	131.51	112.945	97.7666	108.878	122.079	122.46	155.637	126.349	218.098	91.5948	166.94	130.256	150.513	177.2	139.163	109.151	151.662	161.764	261.512	209.659	163.785	154.694	95.6974	118.633	144.085	127.616	122.8	203.478	93.9521	186.9	129.172	104.506	195.322	136.805	114.667	168.662	176.018	133.17	149.344
ESI+	99.1052	14.452	HMDB0031404	Cyclohexylamine	C6H13N	99.1048	4	790.124	701.598	686.148	582.283	588.257	577.448	477.687	558.922	480.093	518.672	527.168	529.466	412.524	514.912	471.867	455.789	560.586	614.462	487.972	644.514	528.9	577.834	428.937	522.264	429.247	565.004	665.039	731.777	736.342	65.9039	748.349	767.178	707.613	698.107	681.858	686.48	629.161	686.662	752.566	725.278	652.852	818.056
ESI+	100.018	0.632	HMDB0032523	Succinic anhydride	C4H4O3	100.016	16	6.5804	6.85202	7.64969	7.396	5.73852	8.66311	7.59154	7.53629	7.72495	7.51345	9.38307	5.043	6.56351	6.17268	10.5259	8.11176	5.15099	8.45299	7.23492	7.76201	4.17886	6.0213	4.53332	4.19166	3.89632	3.41383	6.93074	8.17553	6.98664	6.46313	7.23154	9.47568	11.329	7.29191	6.47047	8.04998	8.77583	6.71227	6.0906	8.9494	10.1753	8.04191
ESI+	100.089	0.316	HMDB0005994	Hexanal	C6H12O	100.089	4	9.08359	76.3643	73.1698	65.0811	4.16684	6.77127	2.10789	65.0681	4.42841	64.2498	93.1722	95.9368	6.53331	2.83876	2.74912	83.9571	93.0756	62.6741	2.88053	6.74728	49.0405	57.707	57.4648	2.89533	3.74455	51.9438	69.129	6.70595	2.50952	2.45973	73.9153	80.3989	82.8595	2.7307	5.6864	69.6174	2.96728	81.465	6.34139	75.7461	3.06591	2.6226
ESI+	101.121	14.441	HMDB0032539	Triethylamine	C6H15N	101.12	3	52.7677	39.6981	49.581	46.6443	48.1171	44.3864	36.0738	43.6374	48.5317	54.9598	46.3991	52.8292	38.2263	47.5069	44.6167	53.9349	55.5165	50.4196	58.6139	69.1608	47.7732	46.0803	49.3624	52.2568	39.9736	47.1833	58.9097	58.848	47.3042	56.0821	54.4734	53.1869	49.8847	57.1155	49.083	40.7919	56.6183	44.6888	55.1984	54.8802	64.0762	51.0689
ESI+	103.064	0.842	HMDB0000452	L-alpha-Aminobutyric acid	C4H9NO2	103.063	2	17.1575	16.0161	17.0473	12.7221	10.9891	13.8496	14.9185	15.8837	12.2546	7.76998	20.35	6.84902	11.1477	6.80728	13.3632	15.0036	3.78524	6.35722	17.8997	6.93943	21.0223	5.83543	14.134	20.7085	15.6523	10.0666	12.3573	14.9574	6.4063	11.3296	30.6376	9.99662	13.5118	14.8989	10.6316	11.984	16.0628	12.633	26.0209	18.3402	29.7922	8.58209
ESI+	104.009	14.601	HMDB0000691	Malonic acid	C3H4O4	104.011	16	77.5393	64.9209	77.4092	74.1452	65.6696	57.5258	61.3049	70.0547	53.9124	38.9881	54.4609	31.6335	23.7741	33.7642	38.2991	44.1484	31.8452	66.6484	73.5531	61.4978	59.6387	59.7263	48.5431	35.2906	60.3183	43.4599	76.1188	72.919	82.3086	70.5862	79.7006	93.9176	85.8362	79.7669	45.0246	73.9757	60.3624	66.1041	98.9618	66.5774	73.9779	96.4058
ESI+	105.079	0.823	HMDB0004437	Diethanolamine	C4H11NO2	105.079	5	15.7963	13.515	12.7877	15.851	7.44417	12.0556	9.46292	10.9765	12.998	12.3504	7.97455	2.60362	13.1503	5.93211	7.22966	7.07205	5.68925	7.32938	4.38522	7.95738	6.4213	11.2107	7.41951	5.89357	20.116	6.43022	7.25283	3.52991	4.08012	10.9291	5.66505	3.67903	6.58948	12.2982	4.80196	8.59077	4.69325	6.02557	8.95199	2.78491	4.30171	8.50954
ESI+	110.013	14.515	HMDB0031334	Glycerol alpha-monochlorohydrin	C3H7ClO2	110.013	2	3623	3241.45	3720.35	3455.1	3496.99	3268.33	3299.27	3157.45	3480.2	3741.49	2857.48	3562.19	2617.03	3357.84	3002.48	2715.85	3162.88	3635	2433.15	3650.25	2976.94	2018.3	3648.43	1518.95	3161.42	3222.27	2965.78	3827.13	3925.69	3533.54	3555.63	4011.19	4227.43	3742.01	3807.78	3521.28	2436.58	3398.86	2287.28	3579.67	3558.46	4316.24
ESI+	110.034	0.727	HMDB0000957	Pyrocatechol	C6H6O2	110.037	21	29.8544	27.5923	36.367	27.2322	18.4958	25.2115	16.1029	20.6845	21.8407	24.1984	22.2902	30.4336	25.4464	26.9512	24.6579	23.0449	22.9088	29.0372	26.501	34.4668	34.4977	31.0856	34.2898	43.3448	46.2577	45.0506	36.823	49.9429	27.8293	28.1781	31.2159	24.6298	32.3632	28.3073	22.9791	33.89	27.3445	24.1618	23.1226	30.0953	30.2066	20.2086
ESI+	112.014	0.849	HMDB0000617	2-Furoic acid	C5H4O3	112.016	22	1020.53	1124.17	1121.21	1006.36	1045.14	1016.18	837.984	937.101	807.108	866.318	1063.27	914.722	656.314	537.638	676.092	731.593	105.773	313.779	1248.08	840.674	1340.51	358.289	1262.99	1020.11	1397.91	1017.11	1601.9	487.874	369.692	1032.78	1334.07	1385.69	945.089	1203.06	916.174	903.441	668.961	855.69	1436.7	1073.18	1026.51	1071.82
ESI+	112.028	1.251	HMDB0000300	Uracil	C4H4N2O2	112.027	2	2.89197	3.85668	4.21851	3.34699	3.84917	5.23849	3.24425	4.64072	3.9081	4.58529	7.24323	6.12491	2.71979	3.65915	3.28712	6.03379	1.35042	4.82224	8.8029	9.0749	4.42936	3.41296	4.77575	2.99096	8.40115	5.06552	4.34631	4.23889	5.06505	3.20156	4.98133	3.85792	2.86187	5.80904	4.12583	3.00421	4.08173	3.48836	5.21699	2.4815	3.02274	4.89707
ESI+	113.059	0.811	HMDB0000562	Creatinine	C4H7N3O	HMDB0000562	2	4637.02	5708.45	4362.56	3175.08	5582.17	4015.84	5609.74	5521.72	5273.45	5789.29	4602.65	5944.01	5112.7	4858.64	2698.57	5908.39	3557.19	3013.69	6926.3	5575.21	4739.83	2745.14	5280.3	5858.07	7391.61	6827.38	3635.13	4231.33	2528	6169.63	4414.85	3695.82	5723.16	3446.58	4212.86	3337.89	3158.53	4568.62	6055.63	6953.74	4297.64	3655.23
ESI+	114.043	1.251	HMDB0000076	Dihydrouracil	C4H6N2O2	114.043	1	9.09032	28.7816	8.23814	7.6199	8.47651	6.48665	9.90354	9.45216	10.084	8.36908	14.0963	13.1945	11.35	9.25015	27.0582	6.59729	6.62804	3.35948	4.89063	17.3044	17.0973	8.13521	50.4987	10.5761	11.292	11.3837	6.30231	9.60557	5.39023	4.42583	14.8817	12.2598	3.41759	13.4759	6.62741	3.85344	3.6983	2.90886	14.4774	26.0021	10.2137	4.0633
ESI+	115.064	1.589	HMDB0000162	L-Proline	C5H9NO2	115.063	3	14.1292	13.0558	16.3881	13.2423	1.77085	2.33802	2.15377	2.89349	13.1824	2.10335	11.6286	11.5358	10.642	10.763	11.326	10.3934	14.066	16.7932	13.4833	14.0156	12.2972	15.155	15.9453	12.1569	14.0036	15.7131	10.459	17.3799	10.7795	11.9828	16.1776	11.4518	16.8037	14.594	8.30807	15.3467	13.0155	9.78155	11.777	14.1642	9.72447	12.275
ESI+	115.978	14.519	HMDB0029720	2-Thiophenethiol	C4H4S2	115.975	22	208.251	303.228	416.34	66.2985	326.613	192.425	315.263	192.381	219.32	346.006	330.301	438.156	259.717	201.676	326.084	333.679	486.273	275.243	472.78	506.666	59.7646	429.086	226.669	441.526	341.792	446.063	340.4	93.0282	402.419	437.346	492.939	505.662	377.572	451.633	438.294	435.161	303.194	62.5809	441.579	347.601	448.043	360.873
ESI+	117.028	0.637	HMDB0002287	Homocysteine thiolactone	C4H7NOS	117.025	25	839.91	871.976	917.7	1039.14	854.521	1004.9	937.318	1094.32	1220.19	1291.22	1822.04	1140.9	1456.35	2168.06	2182.49	1606.09	1223.93	1284.08	1207.52	1438.52	1096.62	1483.54	1307.11	1259.7	1287.56	1182.38	995.66	958.1	959.749	1032.45	987.439	1041.09	1088.63	1078.69	957.43	1178.42	954.261	865.575	1030.26	1337.16	972.576	943.538
ESI+	117.079	0.826	HMDB0000883	L-Valine	C5H11NO2	117.079	1	1675.76	1330.16	2021.52	1318.11	1201.63	2414.62	1205.4	1570.38	2089.02	1593.56	639.477	419.167	1175.65	391.797	480.22	432.297	708.771	521.77	474.82	449.347	443.463	257.265	632.397	411.72	433.407	379.774	452.556	301.882	238.447	423.139	584.626	376.927	461.865	277.32	354.103	453.249	308.257	504.436	716.298	272.615	423.588	556.268
ESI+	117.116	14.45	HMDB0033971	2-Diethylaminoethanol	C6H15NO	117.115	4	798.747	712.036	694.522	591.882	597.221	589.664	488.225	570.638	491.519	529.423	543.731	546.43	427.363	531.132	485.763	473.629	573.583	628.075	502.768	666.707	542.813	594.866	443.224	538.943	443.943	579.321	675.035	743.73	746.795	699.313	759.526	778.823	720.468	709.086	694.75	697.196	640.763	697.363	760.511	737.021	665.019	829.557
ESI+	118.066	1.946	HMDB0001863	2-Hydroxyvaleric acid	C5H10O3	118.063	24	65.4626	49.3469	51.7282	54.2277	56.708	51.3305	52.5562	56.2084	59.0395	61.4826	66.6016	64.9706	43.3545	62.9815	50.3693	62.8752	69.6004	67.2026	53.7975	64.7539	54.5867	67.9561	53.7374	53.864	67.2273	55.5668	48.0398	54.087	48.5057	67.2288	62.5497	54.4281	54.7594	58.2866	53.4473	52.5124	39.1044	57.2568	45.642	42.8194	38.534	50.4475
ESI+	119.058	0.895	HMDB0000167	L-Threonine	C4H9NO3	119.058	1	52.6275	49.552	51.1897	44.1744	39.4016	48.363	33.4426	38.5858	39.925	45.2558	37.6904	39.684	24.4161	22.488	19.903	42.3473	26.202	27.3549	57.9204	36.0562	54.1314	32.3142	87.0339	63.5846	44.2309	46.2867	57.0435	42.9951	39.6157	18.0321	45.4724	72.6899	113.852	74.9991	59.3023	55.5317	42.5818	57.7345	59.7671	56.0703	36.8895	48.8913
ESI+	122.034	0.739	HMDB0001870	Benzoic acid	C7H6O2	122.037	20	1333.29	1460.57	1462.44	1336.6	1299.65	1363.41	1191.64	1379.29	1428	2403.61	1955.09	1485.68	1031.61	1587.85	1890.78	1183.15	1185.28	1683.8	1762.02	1790.48	1616.33	1535.18	1507.93	1511.54	1581.53	1603.73	1521.47	1644.12	1928.29	1503.16	1608.56	1592.88	3324.95	1564.45	1482.54	1467.52	1448.43	2623.14	1548.11	1637.69	1500.25	1596.98
ESI+	122.047	1.248	HMDB0001406	Niacinamide	C6H6N2O	122.048	7	17.0789	17.7703	14.6286	14.4536	12.9498	14.5243	16.8483	19.2061	16.3432	14.7623	19.1215	14.0728	15.5125	19.3992	18.4111	22.4413	9.19137	16.7405	10.7298	10.1681	22.3644	16.0976	24.9821	11.0337	10.7123	24.1268	14.7186	11.6158	7.24915	9.56507	10.7326	7.26599	14.6766	13.5011	8.91481	7.66552	9.20878	12.6609	8.63019	13.3888	18.3631	9.29282
ESI+	125.965	14.621	HMDB0013780	Dimethyl trisulfide	C2H6S3	125.963	13	319.671	335.645	283.487	310.2	313.351	279.92	279.426	178.12	309.401	336.503	362.595	411.671	354.18	273.931	219.466	377.579	450.406	367.458	362.652	444.628	395.628	500.884	429.892	423.698	438.792	377.69	329.568	375.197	320.781	367.156	369.087	337.709	408.884	360.537	312.291	347.149	320.104	335.557	368.846	361.949	301.167	204.63
ESI+	126.039	14.495	HMDB0000262	Thymine	C5H6N2O2	126.043	29	53.4261	36.7575	61.4055	40.5203	45.1837	35.5617	19.9888	44.3429	42.8931	50.734	22.9184	36.6214	18.9038	32.7889	25.2787	31.6095	31.3028	44.3599	42.7918	28.8498	26.6672	26.2799	46.7826	46.7201	24.792	28.4826	45.2722	30.3671	56.5364	38.1082	64.1044	47.1885	53.2203	46.8257	32.6022	72.5132	36.5884	29.193	81.4894	62.9954	38.1766	74.1137
ESI+	128.013	0.632	HMDB0059784	5-Hydroxy-2-furoic acid	C5H4O4	128.011	16	299.886	308.511	299.563	281.04	302.718	278.725	284.731	315.051	311.097	329.114	508.983	288.293	381.023	537.948	547.927	383.964	289.831	310.001	335.41	327.686	264.197	389.704	342.491	333.672	316.775	301.903	362.054	256.581	288.73	318.357	318.526	340.302	309.617	292.725	328.801	336.922	230.345	262.905	294.097	382.45	296.481	285.409
ESI+	128.059	0.819	HMDB0000079	Dihydrothymine	C5H8N2O2	128.059	0	50.6016	71.3154	73.0174	42.743	47.9063	46.6571	56.8517	41.6175	71.0495	52.0503	40.1084	45.8917	69.9151	54.8165	61.3107	48.5247	31.5158	55.6431	45.0454	54.3702	96.9127	37.9935	72.435	78.0214	56.7011	51.6654	60.9728	41.3169	34.441	97.6551	36.3578	39.2145	55.9218	54.0855	56.6959	39.4045	52.6298	69.9606	77.1036	86.4691	47.5342	50.3351
ESI+	129.043	0.887	HMDB0000267	Pyroglutamic acid	C5H7NO3	129.043	1	1169.05	2025.08	1502.03	2208.75	1288.48	2139.26	1286.13	1798.08	1767.34	1481.14	2459.79	2440.25	1813.32	2720.8	2070.5	2237.85	849.509	2177.92	1886.99	3538.12	2655.24	1768.99	2609.97	1575.69	2805.33	2187.42	1354.18	2618.41	2395.5	2424.92	2716.67	2047.04	2300.7	2301.3	2223.79	2173.67	1810.2	2214.2	2931.02	2471.32	2242.13	2051.86
ESI+	129.079	0.817	HMDB0000070	Pipecolic acid	C6H11NO2	129.079	1	638.791	502.999	499.535	404.911	590.002	445.795	560.871	465.158	643.776	513.043	1611.29	707.605	621.254	428.474	517.039	571.014	386.896	707.454	501.638	686.373	469.731	370.646	934.064	352.22	414.325	504.256	367.243	748.199	352.23	468.61	360.477	507.595	653.63	265.324	409.613	404.126	618.482	766.003	763.849	346.523	430.446	502.84
ESI+	129.959	14.694	HMDB0062193	2,2-dichloro-1,1-ethanediol	C2H4Cl2O2	129.959	8	4179.6	3013.81	4150.44	3210.85	4307.58	3680.64	3388.36	3069.12	3679.87	4504.79	4397.19	2913.45	2986.74	4683.47	3933.19	3670.42	4214.92	4554.56	4492.26	5571.49	4795.95	5026.7	4101.65	4027.62	5670.88	3631.47	4366.57	3970.06	3800.35	4823.17	4507.55	4603.81	4484.88	4128.84	3588.87	4013.94	4482.83	4204.59	4591.07	3926.64	4159.04	4562.64
ESI+	131.058	1.557	HMDB0001149	5-Aminolevulinic acid	C5H9NO3	131.058	0	100.834	89.0684	67.5446	135.518	75.2623	108.251	64.3185	103.706	86.6541	83.1642	135.973	199.005	117.186	25.7032	124.733	146.03	26.5495	33.1538	187.031	171.871	193.953	49.8527	154.111	97.773	214.176	78.1879	175.177	97.9919	43.4735	47.6916	161.479	160.191	133.616	68.5301	151.769	135.762	120.675	72.9674	127.782	160.398	200.509	181.657
ESI+	131.07	0.816	HMDB0000064	Creatine	C4H9N3O2	131.069	0	5974.66	7188.98	5015.34	3489.64	6230.01	4706.17	6077.99	6098.5	5861.02	7548.7	7177.18	8005.21	4802.21	6136.61	4108.48	6479.53	3914.91	3191.54	7310.85	6511.72	7137.91	3903.27	6690.04	7720.85	8758.17	8107.26	3979.73	5843.32	4305.97	7404.44	5639.47	3844.42	6393.33	3783.32	6160.38	3970.36	5445.31	5710.78	7771.13	7160.1	5422.56	5996.65
ESI+	131.095	1.37	HMDB0000687	L-Leucine	C6H13NO2	131.095	0	2488.33	2481.54	2492.03	2383.09	2283.36	2286.21	2319.48	2470.6	2419.13	2599.69	4318.1	2414.46	3322.71	2563.85	4917.68	2792.87	1067.93	3224.13	2957.47	2037.61	3852.27	1135.39	4519.39	3459.53	2517.45	2347.75	3730.16	2281.39	1252.59	2792.49	2775.26	2699.63	3036.85	2425.94	2120.5	3013.68	1999.33	2931.76	4192.64	2747.18	1846.08	2478.65
ESI+	132.055	0.724	HMDB0000026	Ureidopropionic acid	C4H8N2O3	132.053	1	169.977	157.617	186.153	176.803	146.034	162.061	124.226	164.117	183.313	271.261	264.553	320.124	286.589	222.117	262.871	230.699	215.916	269.022	215.434	282.042	284.369	289.72	251.797	243.355	291.516	267.881	164.124	285.444	222.938	147.897	191.332	183.383	215.771	224.402	165.307	204.338	212.069	193.016	172.618	215.963	188.143	181.773
ESI+	132.069	1.883	HMDB0000317	2-Hydroxy-3-methylpentanoic acid	C6H12O3	132.079	0	4.91413	6.036	6.77419	5.47205	5.66695	5.34147	4.92451	4.69619	5.48049	6.93731	5.99832	10.3567	3.50941	2.24261	1.94631	3.61986	3.61596	18.1533	23.9687	5.45384	5.71184	2.33041	1.87958	5.23175	4.08817	4.49688	21.9522	3.05784	19.1999	1.49575	9.93018	5.11217	6.88891	1.88359	4.90993	4.62908	3.94449	0.916968	7.3182	13.1853	4.81288	37.4935
ESI+	134.025	0.629	HMDB0000156	Malic acid	C4H6O5	134.022	26	1.16047	0.849136	2.87944	0.775701	2.31165	2.73012	2.30281	0.756635	0.771301	0.877	1.03108	0.871656	0.921354	3.20256	4.4242	0.949724	0.849838	0.86056	0.916652	3.61137	1.32969	0.978391	0.899344	0.888074	3.57593	3.69637	0.823003	1.03042	0.89855	0.875673	2.37726	2.76477	0.946383	3.72505	3.79037	4.59393	0.727845	2.68028	0.765741	0.959045	2.86377	0.872544
ESI+	135.056	4.65	HMDB0000034	Adenine	C5H5N5	135.054	12	7.0974	10.3036	12.9056	8.85552	21.0683	5.41534	6.67718	15.2149	17.1782	1.28915	17.8995	17.9812	5.41582	8.3951	15.5764	15.6577	10.6305	12.8479	25.2023	14.2059	21.608	25.1665	19.6914	6.58442	10.181	9.46462	15.9145	15.3499	9.31453	25.9124	5.75887	26.6102	59.0691	8.87276	22.483	9.81472	15.2694	39.1752	8.423	13.4438	9.35911	9.9756
ESI+	136.038	1.249	HMDB0000613	Erythronic acid	C4H8O5	136.037	10	118.576	113.73	118.788	97.3437	105.201	105.575	97.1187	121.523	120.526	121.393	38.1205	160.385	107.579	183.722	145.146	194.005	132.174	81.1611	160.09	141.527	153.502	69.5196	113.668	150.206	167.684	169.576	115.686	95.8442	109.808	122.295	113.02	121.339	107.322	142.516	93.1209	86.9195	149.333	95.7826	104.524	118.23	113.425	123.31
ESI+	137.048	2.802	HMDB0015687	Salicylamide	C7H7NO2	137.048	1	83.2467	81.3072	83.9246	81.3344	82.7866	82.9228	82.8883	97.1552	83.1089	87.1968	2.67288	3.59163	71.0094	71.854	33.5943	94.2917	4.33518	1.86076	1.08028	2.68209	0.798177	4.42731	64.4141	2.30277	0.83612	1.59788	23.8295	18.1132	11.2194	81.7623	4.40923	2158.68	10.4724	1.81536	2.93536	3.22777	12.5079	6.38357	73.2287	12.8601	29.8427	101.636
ESI+	138.043	1.246	HMDB0000301	Urocanic acid	C6H6N2O2	138.043	1	12.0686	26.7769	12.6248	10.2295	11.5798	9.20708	10.3105	11.481	13.2744	15.9009	16.3237	11.5317	9.42245	15.8005	33.4696	5.42329	25.291	6.03693	12.996	20.9933	17.7054	8.32699	43.0615	14.5814	10.8145	10.2668	7.3506	8.5055	8.71845	5.32583	5.19735	12.2245	5.61653	15.1914	8.01475	10.9759	4.93176	11.8813	10.102	26.5787	4.88742	4.30751
ESI+	143.095	0.838	HMDB0004827	Proline betaine	C7H13NO2	143.095	0	410.035	426.357	419.42	343.872	356.188	336.256	312.266	335.792	369.684	113.87	1684.8	71.1072	706	468.769	44.7396	145.211	221.017	1010.33	920.659	896.981	2010.83	26.4368	59.9228	31.487	84.8898	221.821	161.375	142.53	33.5198	88.4474	701.414	78.4742	185.207	132.835	180.134	42.2527	71.0229	23.9799	60.2104	40.2459	91.9995	22.0289
ESI+	144.04	0.825	HMDB0000393	3-Hexenedioic acid	C6H8O4	144.042	17	123.544	182.22	188.186	122.126	150.229	137.913	143.631	132.209	103.375	138.933	147.307	144.062	86.2911	136.432	112.054	128.038	20.2753	81.1157	147.176	96.7414	198.942	101.67	139.718	141.587	235.525	146.848	142.834	90.3184	58.5148	147.247	109.587	123.359	98.8478	186.929	78.057	92.5002	90.0045	92.2878	196.569	111.213	111.85	151.465
ESI+	145.05	0.633	HMDB0029737	Indole-3-carboxaldehyde	C9H7NO	145.053	16	715.902	823.851	676.165	536.488	640.779	519.196	591.579	514.612	471.466	545.458	634.311	318.892	565.617	720.136	771.847	578.238	329.36	452.477	505.518	448.53	295.166	380.631	379.205	343.097	350.698	333.999	783.63	511.65	574.76	658.492	600.854	693.579	607.535	641.467	758.612	631.372	428.829	482.777	626.666	703.258	615.159	497.299
ESI+	145.074	0.845	HMDB0001263	Allysine	C6H11NO3	145.074	1	39.5725	40.9484	38.4322	25.5554	38.3603	25.5543	28.0929	41.0648	35.191	38.3867	40.1211	35.2729	29.5915	32.2705	27.9045	33.4282	11.4283	27.3069	58.3346	40.8542	63.4655	17.4719	53.2781	31.877	48.4645	47.9651	53.5098	17.5785	18.3828	38.1207	34.8805	28.7276	20.1647	28.7557	35.6006	35.9352	21.4821	29.627	47.5304	49.7419	39.5007	46.3376
ESI+	146.022	1.246	HMDB0000208	Oxoglutaric acid	C5H6O5	146.022	0	38.8701	37.7043	41.3519	31.5972	37.7821	35.2872	36.7858	41.6593	38.9159	42.5213	74.9929	46.9596	49.6737	37.6192	45.3183	46.873	41.1584	36.2943	37.4427	55.691	39.1548	60.5634	84.957	36.1777	48.5545	53.9634	30.5049	29.6598	34.793	36.348	40.0106	46.2748	42.5783	30.3705	34.126	29.8864	26.5319	41.7957	42.3483	30.6573	29.0909	40.4429
ESI+	146.069	0.907	HMDB0000641	L-Glutamine	C5H10N2O3	146.069	1	633.799	1517.69	964.826	1703.06	712.462	1703.3	876.799	1295.72	1304.76	953.923	1748.55	1745.32	1300.96	2140.54	1668.08	1585.18	1057.23	1755.65	1259.25	2781.79	1846.7	1413.56	1785.4	1023.4	2148.95	1571.03	912.881	1979.91	1878.73	1777.96	2014.93	1501.15	1485.48	1681.76	1628.32	1612.1	1343.53	1781.53	2298.44	1798.74	1754.53	1318.6
ESI+	146.105	0.678	HMDB0000182	L-Lysine	C6H14N2O2	146.106	1	104.628	108.035	96.6574	95.6735	100.909	103.404	94.3242	108.906	109.314	113.786	150.307	127.02	86.3495	105.873	108.74	119.715	98.1494	108.57	160.781	72.1751	160.142	87.9827	163.055	147.053	110.721	94.9209	151.124	68.0613	86.6716	118.734	139.305	100.694	147.406	89.1596	116.414	107.731	108.262	93.8312	166.989	137.649	91.9627	76.4112
ESI+	147.053	1.25	HMDB0000148	L-Glutamic acid	C5H9NO4	147.053	0	278.402	275.954	216.523	195.849	239.956	430.908	174.616	219.307	205.969	230.386	287.765	196.914	214.157	230.184	224.319	258.415	173.833	195.268	428.055	332.814	297.052	167.394	323.156	114.294	289.72	342.776	107.738	213.745	212.648	264.226	314.778	158.023	201.892	229.268	232.945	260.366	172.02	116.232	131.424	292.188	194.053	244.954
ESI+	148.016	8.696	HMDB0001553	Ketomethiobutyric acid	C5H8O3S	148.019	24	3943.16	4452.61	3758.18	5012.39	5278.37	4633.14	5090.45	6449.91	6079.9	6112.51	5613.52	6128.66	4851.24	6870.1	5339.58	5789.03	6388.35	6779.76	6776.33	7877.82	7030.39	7550.35	6427.19	6531.69	5949.51	7001.08	3664.69	4826.79	5459.23	4832.39	4824.8	5599.9	4987.19	4198.28	5327.31	5264.7	6357.4	5588.29	6473.88	5346.79	5758.48	5136.15
ESI+	149.051	0.83	HMDB0000696	L-Methionine	C5H11NO2S	149.051	2	10.7139	8.93928	8.16356	8.90439	7.19653	6.92737	6.82161	6.46094	6.97407	7.49912	6.78445	4.98036	5.92616	8.64257	4.11053	6.30764	3.00495	6.26088	5.43391	6.26227	8.9109	5.16515	20.5916	6.73122	7.1975	6.82368	14.6601	6.63085	5.49399	10.3146	7.25097	4.7806	5.33711	8.57201	15.4223	6.78416	4.06676	6.26386	8.93358	5.24119	7.98576	4.83673
ESI+	149.105	0.854	HMDB0032538	Triethanolamine	C6H15NO3	149.105	0	2570.43	1743.76	2205.44	1594.78	1314.78	2497.76	1310.09	1651.92	2186.55	1726.86	362.081	253.138	802.641	178.179	367.989	280.079	281.975	215.877	292.639	268.62	362.467	96.3739	364.022	283.299	310.018	192.905	317.741	199.61	128.214	248.629	590.782	320.134	230.984	267.52	286.583	248.561	174.371	351.981	344.665	237.293	276.964	455.356
ESI+	150.053	1.247	HMDB0000751	L-Xylulose	C5H10O5	150.053	0	1.64809	2.08417	3.03149	2.65378	2.04106	2.11577	2.10211	2.79891	2.20999	2.33019	2.01574	3.01559	1.02577	1.72635	1.60825	3.64641	1.63558	0.862685	2.76647	2.34605	1.77827	3.63405	4.00894	3.74238	3.73035	6.02434	1.71589	5.05577	3.77019	2.68584	7.39088	8.29278	3.57729	4.84181	5.71756	2.64612	5.79462	1.94581	1.67867	5.52155	2.67627	2.94991
ESI+	151.063	1.985	HMDB0001859	Acetaminophen	C8H9NO2	151.063	0	10.5282	17.8516	16.8707	10.9006	12.8946	9.534	14.8223	17.0675	18.2925	16.9329	12.2534	13.9006	880.635	12.2579	12.2296	10.2495	14.7988	7.23488	10.4981	17.677	12.7706	15.0975	11.3214	11.2948	14.096	14.565	5.516	7.43367	7.40601	8.85549	10.5526	10.2012	11.147	9.52144	9.2914	9.13806	6.34462	7.77844	7.56917	6.87749	4.96656	8.47243
ESI+	152.032	0.636	HMDB0000292	Xanthine	C5H4N4O2	152.033	8	25.2004	25.1907	32.0023	26.9049	27.8154	28.6445	27.1849	28.4869	31.8055	29.9655	43.8122	26.8781	32.8216	45.434	45.8052	40.0024	28.1531	29.3681	31.8522	35.0437	26.3964	35.8677	32.4098	27.9938	30.6002	30.5036	32.2073	27.6552	26.403	29.9495	27.3029	25.933	28.0849	29.1628	30.8964	32.2214	23.7428	26.8085	27.5612	38.1517	27.1943	27.4469
ESI+	152.047	0.241	HMDB0031609	Phenoxyacetic acid	C8H8O3	152.047	0	131.237	125.609	127.745	123.3	128.942	115.96	99.2062	3.38876	122.037	137.392	141.328	4.52622	3.48587	3.98273	125.309	3.6734	147.26	141.808	170.138	176.958	158.856	10.7823	166.162	170.612	200.132	171.114	124.948	139.385	137.482	119.678	137.895	145.765	149.15	128.726	3.48227	139.668	3.6166	132.038	134.373	138.207	121.52	133.517
ESI+	153.076	1.388	HMDB0000073	Dopamine	C8H11NO2	153.079	16	69.1961	67.5371	65.424	72.5833	35.5079	47.4007	52.4187	64.7029	76.1896	62.9029	141.355	68.5034	105.993	66.7579	109.645	74.8956	21.0418	87.2608	71.6113	53.8913	103.898	32.9694	157.565	99.4739	74.6557	82.7861	97.8865	63.0718	31.0934	65.0567	77.5729	64.2976	89.8645	57.0337	64.3468	73.5507	45.1554	70.3483	118.252	71.5306	46.783	46.1614
ESI+	154.039	1.536	HMDB0012209	Diethylphosphate	C4H11O4P	154.039	1	25.9666	27.0835	27.0004	21.7334	25.0168	24.2919	22.9043	25.3287	24.0543	25.4106	4.62058	1.90572	7.20773	7.41714	5.24729	88.3892	4.34104	30.0253	133.986	4.31679	57.1664	14.8344	20.2627	11.7875	5.76655	47.1421	116.552	67.8791	35.8822	8.70345	11.6864	86.7208	4.25979	4.26741	99.0876	71.8698	6.81518	7.61095	4.83859	3.01082	167.306	155.57
ESI+	155.069	0.898	HMDB0000177	L-Histidine	C6H9N3O2	HMDB0000177	2	81.6029	84.6831	87.0932	67.2002	37.0753	65.2233	82.7728	70.7693	83.2537	80.3122	50.1754	134.304	33.5542	55.3999	71.929	54.9169	25.0476	56.4399	88.2906	99.4491	125.844	55.5769	145.786	91.9113	76.5564	74.2362	89.8509	64.4983	63.2978	84.5911	88.1866	92.1196	85.4853	105.263	86.8723	87.8632	75.2463	79.1895	59.5424	91.9091	76.3308	95.9465
ESI+	155.983	14.54	HMDB0000816	Phosphoglycolic acid	C2H5O6P	155.982	6	1209.05	992.347	731.77	920.809	1068.6	1029.01	903.955	1147.09	988.299	1150.51	1064.36	1478.16	1033.15	458.483	1022.89	648.665	1233.28	625.596	1050.66	1337.52	1063.63	1270.48	1178.3	1113.35	1254.85	1122.45	1039.96	1141.69	1182.01	1089.5	1170.88	1224.13	1294.6	928.908	1160.83	1199.76	1133.52	1110.83	797.596	1188.28	1126.15	1469.47
ESI+	157.11	2.029	HMDB0014447	Tranexamic Acid	C8H15NO2	157.11	1	30.4046	26.2743	32.9067	22.885	23.7724	27.0735	24.2516	25.749	28.1288	31.5989	11.5752	13.5483	14.6962	6.91859	66.8532	16.6409	9.1772	315.981	15.7829	13.4766	16.6585	11.9621	62.4602	15.0905	24.9468	10.3072	447.906	12.029	8.65385	15.311	53.943	13.0109	12.1599	17.3093	9.15811	6.96529	12.7112	8.79801	17.1583	23.8796	17.6198	12.9687
ESI+	157.965	14.574	HMDB0061737	Dimethyldithiophosphate	C2H7O2PS2	157.963	15	587.68	758.296	521.343	883.31	808.954	865.69	265.887	563.503	509.807	481.905	1027.54	1066.58	493.166	920.675	984.381	440.636	979.235	704.314	557.158	724.23	913.47	966.033	899.454	594.24	895.482	845.485	833.459	835.275	618.423	610.248	876.585	734.241	1003.79	699.389	850.951	799.821	610.925	804.824	1118.12	424.034	789.61	953.887
ESI+	158.043	0.634	HMDB0000462	Allantoin	C4H6N4O3	158.044	7	21.8003	19.2355	20.9914	20.1363	13.9393	15.5824	14.724	15.8506	18.7529	18.3525	32.9092	18.9441	27.3593	30.3602	32.6852	28.6324	22.7926	22.6015	18.562	24.9644	23.4573	28.0752	26.3607	24.2223	28.6596	30.5709	17.9373	23.656	17.3654	16.4332	21.81	15.9604	23.3722	21.7065	13.9431	22.4405	15.0077	16.5501	15.2464	24.8137	16.9223	14.5526
ESI+	158.094	2.409	HMDB0000451	cis-4-Hydroxycyclohexylacetic acid	C8H14O3	158.094	0	28.9733	97.9812	89.107	88.426	94.2763	78.9878	85.3347	93.7542	101.281	111.846	106.267	120.262	98.5495	93.6629	621.938	38.8846	119.687	14.7735	107.32	143.826	123.204	139.66	127.733	130.209	21.4865	121.331	21.8369	118.381	89.3234	90.246	105.004	76.7495	17.9239	16.5418	83.0924	91.1359	14.2193	84.5569	87.2235	97.6557	82.8874	94.4108
ESI+	159.089	0.634	HMDB0011757	N-Acetylvaline	C7H13NO3	159.09	1	23.7648	25.3391	23.7763	21.4525	22.8751	22.1543	25.3398	25.6081	23.6286	23.261	38.2987	23.0218	30.2572	36.1471	35.0701	31.6691	33.8396	32.4737	25.9423	29.0245	23.6583	25.8464	24.4653	26.3668	27.1983	20.7507	24.0437	24.0819	23.6267	25.591	26.7721	28.84	25.9954	25.4537	30.7669	28.4386	24.001	25.2131	24.2917	31.4741	24.9443	26.4573
ESI+	160.097	0.631	HMDB0000303	Tryptamine	C10H12N2	160.1	17	14.324	14.96	12.6516	14.4605	13.0494	12.6981	10.9704	14.2053	16.9556	13.7312	16.9676	11.7746	12.5449	16.9166	19.5507	14.6959	12.6412	14.9665	15.3906	17.6162	12.5699	10.7925	13.0505	11.5347	13.3589	11.4099	14.9948	12.2443	13.9989	11.4156	13.0726	15.3327	16.9753	15.1327	14.77	15.8213	13.8187	12.6287	12.2811	13.9053	14.2092	15.422
ESI+	160.121	0.71	HMDB0002038	N(6)-Methyllysine	C7H16N2O2	160.121	1	12.6653	14.5624	11.458	12.7635	12.6464	12.4517	10.9816	11.9692	12.708	14.6646	10.2762	32.8965	6.70069	62.5246	18.3046	39.6019	3.98479	10.9955	8.56742	23.587	15.9194	5.66779	7.64482	24.8155	23.9307	35.2619	9.14915	19.7788	6.41046	9.98464	7.84587	8.85638	17.8112	6.44778	4.4209	28.3528	17.9524	5.27392	52.2993	11.1782	5.22157	12.6008
ESI+	161.069	1.249	HMDB0000510	Aminoadipic acid	C6H11NO4	161.069	1	16.4056	18.4446	18.538	14.4426	18.1064	20.6631	13.8001	19.6502	23.3539	21.2439	23.6705	21.9936	20.6046	19.6812	16.7808	21.1365	18.9373	17.8467	26.7772	22.4214	30.4089	16.1305	28.2467	18.4206	32.6492	30.3687	18.283	16.6983	13.929	20.7535	15.468	15.3267	19.057	19.3604	25.5738	12.3872	16.2285	14.4113	19.2159	26.7316	16.6602	18.4606
ESI+	161.105	0.809	HMDB0000062	L-Carnitine	C7H15NO3	161.105	1	1086.71	973.474	943.113	747.632	955.894	807.468	898.643	926.832	1037.62	913.309	3246.87	794.283	1344.38	872.664	565.968	741.132	655.782	1714.67	1577.15	1585.4	2305.54	418.095	1043.72	413.715	540.841	1311.3	821.434	902.808	409.568	590.288	954.852	595.797	892.23	394.583	606.234	467.967	696.965	825.841	873.157	418.236	530.86	553.107
ESI+	162.116	14.489	HMDB0001934	Nicotine	C10H14N2	162.116	1	679.207	482.38	639.458	555.346	725.728	479.784	309.745	545.96	545.97	651.823	532.231	589.736	436.962	732.597	530.574	400.688	619.21	580.2	682.63	573.091	615.366	981.635	696.738	742.807	682.01	544.814	466.402	768.343	595.991	680.994	558.273	1331.19	675.897	790.519	557.473	509.562	802.671	482.234	492.61	501.975	447.027	482.253
ESI+	163.061	0.632	HMDB0062406	4-Oxo-1-(3-pyridyl)-1-butanone	C9H9NO2	163.063	15	1912.76	2234.62	1970.01	1438.97	2217.37	1478.64	1639.18	2095.31	2091.45	2133.9	2571.34	1655.36	2108.3	2800.18	2834.15	2211.82	1658.65	1940.87	2094.37	2110.19	1432.31	2106.7	1805.34	1496.41	1897.35	1658.79	2543.68	1813.7	2086.54	2304.18	2068.54	2440.11	2239.32	2305.74	2539.96	2300.53	1769.8	1854.14	2314.42	2503.11	1740.82	1726.97
ESI+	164.047	1.262	HMDB0002035	4-Hydroxycinnamic acid	C9H8O3	164.047	0	192.239	194.906	213.552	190.666	192.707	187.109	181.821	212.754	206.921	207.944	311.157	197.805	346.616	257.242	191.952	238.434	110.023	211.865	321.455	314.463	443.192	107.167	357.398	223.267	229.74	178.345	254.654	172.385	130.366	245.825	209.944	304.902	309.575	214.291	285.234	257.382	174.302	192.599	297.838	216.62	112.583	346.809
ESI+	164.062	0.63	HMDB0002712	1,5-Anhydrosorbitol	C6H12O5	164.068	40	193.822	232.522	200.307	193.812	222.928	181.481	216.223	215.003	221.8	204.059	257.183	169.239	219.539	278.125	284.127	231.862	160.241	204.487	213.118	217.687	147.257	193.623	171.308	147.971	187.358	169.35	255.293	175.288	203.982	238.095	205.349	259.692	229.24	226.225	264.727	223.557	182.542	181.464	245.635	257.147	220.439	208.147
ESI+	164.068	0.958	HMDB0000174	L-Fucose	C6H12O5	164.068	0	4.76233	4.58492	5.66395	4.83102	4.1618	4.3568	4.16143	4.62429	4.40932	4.56288	81.2231	5.30268	4.98774	5.01205	4.19571	4.74209	3.74851	4.36844	5.9504	6.35935	5.85794	5.08237	5.27889	5.55344	6.15991	6.00363	5.31676	4.72051	4.14941	5.20293	5.51946	5.52288	5.26671	5.05775	4.37536	4.84671	4.10819	4.64179	5.95309	5.30931	4.71961	4.90433
ESI+	165.046	0.835	HMDB0004089	Formylanthranilic acid	C8H7NO3	165.043	20	38.0647	38.6342	34.7502	30.337	28.3561	38.234	29.0694	30.6532	32.2965	32.1465	60.1542	35.2414	26.8009	41.949	24.2094	38.6795	26.0164	23.8647	49.7731	40.555	47.2789	25.2526	44.5837	57.6227	21.9973	43.2964	25.2202	29.1416	29.5716	52.5649	49.8136	39.0519	56.9444	31.8106	22.0692	58.6825	26.2781	26.3067	141.241	49.7937	16.2963	45.3296
ESI+	165.079	1.679	HMDB0000159	L-Phenylalanine	C9H11NO2	165.079	0	3053.96	3151.2	3297.25	2924.67	2896.93	2876.52	2704.83	3032.2	3070.15	3079.96	4216.23	2944.53	4687.62	3963.24	3459.22	3257.98	890.988	3165.31	4362.43	4595.64	4479.83	1665.42	5998.11	3424.15	4156.49	2690.67	4564.28	2204.74	1826.47	3564.12	3545.85	3245.88	3388.72	2923.97	3147.78	3752.49	2543.61	3351.84	3616.99	2947.02	2392.53	3583.78
ESI+	166.027	8.688	HMDB0002428	Terephthalic acid	C8H6O4	166.027	0	3919.7	4407.62	3743.29	4976.17	5241.16	4598.29	5065.9	6419.07	6045.65	6076.36	5583.56	6087.61	4824.56	6822.35	5315.67	5744.99	6348.51	6744.23	6739.95	7830.97	6992.54	7523.69	6404.84	6495.08	5924.86	6962.42	3645.98	4792.47	5434.07	4794.98	4802.42	5567.5	4946.32	4174.78	5298.64	5237.7	6330.34	5559.27	6439.9	5312.44	5731.08	5101.17
ESI+	166.045	2.195	HMDB0060256	Xylonic acid	C5H10O6	166.048	14	3.99171	5.01465	3.15022	4.58362	4.65386	4.83765	5.72987	5.63779	4.44609	5.04162	1.06811	0.603116	89.9738	0.509296	0.453848	0.475316	0.632867	0.599331	34.1462	6.78003	20.092	0.569504	0.523733	3.60822	2.71899	0.612789	0.436777	0.794722	0.42835	0.56306	1.23601	0.452932	0.644282	7.69223	0.524185	2.35774	0.482294	0.488509	29.0029	12.5475	13.9902	16.428
ESI+	166.06	0.728	HMDB0002199	Desaminotyrosine	C9H10O3	166.063	16	41.4126	38.9869	38.0893	42.5839	30.703	33.5229	36.6603	41.3355	56.0752	55.0387	72.5315	79.6425	47.312	60.3289	70.2407	63.0691	58.6193	54.8209	48.6639	93.0149	68.2462	71.0985	70.792	67.3445	83.2227	88.5361	37.4788	75.8503	49.8843	43.6682	54.1449	40.155	64.1465	48.0971	45.1621	46.843	50.3711	45.3548	39.8957	48.7799	38.5951	37.9845
ESI+	167.026	14.498	HMDB0000232	Quinolinic acid	C7H5NO4	167.022	4	19.0039	16.5094	20.5102	11.1687	14.7098	11.0273	13.2563	12.8513	17.1184	18.7636	17.7814	30.6146	22.1069	22.6508	22.1793	23.0062	30.744	21.7824	15.8771	16.8006	11.7877	19.8151	26.57	24.9123	20.353	23.529	14.303	16.9903	17.7199	21.261	21.2929	11.3815	25.2919	17.6514	11.3165	21.1848	14.4131	10.8661	24.9281	21.6814	15.6436	20.5285
ESI+	167.056	0.846	HMDB0001545	Pyridoxal	C8H9NO3	167.058	15	34.2827	33.993	31.7274	21.9596	34.8905	23.1099	25.5438	36.1357	32.185	35.5237	31.3548	31.4622	25.5475	24.2423	23.7858	27.7852	5.36087	16.663	52.8525	34.2923	57.6959	13.993	43.9295	28.7292	38.0613	42.4003	47.1555	11.8895	16.2845	34.4718	28.6207	26.2164	16.8659	18.8196	33.0232	30.6844	18.5167	27.0608	39.0153	39.7777	31.8582	38.546
ESI+	168.027	0.635	HMDB0000289	Uric acid	C5H4N4O3	168.028	6	47.0964	46.8095	42.0134	39.5499	35.6348	37.7867	40.0606	39.0365	45.516	41.1304	53.8377	31.573	39.2302	58.6853	65.9154	51.7709	36.1888	49.196	43.7774	54.193	46.8163	53.5488	45.7563	42.0754	45.4465	50.743	40.1981	45.2752	36.233	40.1044	41.5738	41.077	45.3886	43.4032	38.2871	47.4797	33.4072	36.8157	35.5146	51.9141	43.3534	35.8521
ESI+	168.042	3.915	HMDB0001336	3,4-Dihydroxybenzeneacetic acid	C8H8O4	168.042	1	79.5622	67.3791	73.7033	75.4356	56.4473	87.1236	43.7585	82.6676	40.1564	45.8988	248.38	7.73323	42.8987	10.6683	3.14272	50.1895	14.5606	0.980773	0.971705	73.2439	45.2323	79.2178	39.9232	42.7012	144.169	2.5067	1.05914	9.82193	46.7767	13.9022	90.6649	9.676	176.506	1.27904	9.77166	23.3755	168.865	46.2005	5.86981	264.762	121.949	60.8435
ESI+	168.087	0.726	HMDB0001431	Pyridoxamine	C8H12N2O2	168.09	15	59.1091	53.6391	62.4917	55.0113	51.9474	54.561	49.0135	54.0655	54.8864	58.1964	70.5567	70.3575	47.4938	55.0953	55.3733	55.3307	48.7261	65.5282	80.5374	49.3346	86.2029	52.0407	76.1811	73.2955	60.1064	53.885	65.0941	52.5093	44.8166	64.6448	68.0274	59.1514	70.5888	52.594	58.7284	58.878	65.7133	49.4046	80.246	69.8406	51.2878	46.0799
ESI+	169.11	2.475	HMDB0038321	Homoarecoline	C9H15NO2	169.11	0	59.7573	68.7716	67.1656	62.0617	70.1669	68.4972	64.6202	66.7676	71.4784	76.6375	16.2885	14.888	34.0255	16.7799	41.6618	18.777	17.8847	12.3529	23.4081	20.0089	17.039	10.085	7.24646	10.5495	12.9042	15.3925	5.39683	25.8401	6.89787	8.83361	18.084	37.2716	45.7779	21.6015	29.2815	40.8202	13.9192	28.4936	11.6138	14.4564	24.0692	15.2028
ESI+	169.998	14.497	HMDB0001112	Glyceraldehyde 3-phosphate	C3H7O6P	169.998	1	31.1277	24.4767	30.3058	20.7854	24.0051	28.663	24.6067	23.3972	28.2303	31.3305	25.1408	41.6579	24.0732	36.3475	29.073	22.9167	37.2969	22.141	31.5084	32.8233	28.1282	31.9759	36.4334	29.9168	37.5885	32.0794	26.9557	30.8502	36.9199	21.8257	31.2193	34.46	34.6964	34.9432	25.3566	36.9608	27.9963	18.4422	32.0798	26.5126	25.0505	34.6989
ESI+	171.126	9.127	HMDB0005015	Gabapentin	C9H17NO2	171.126	1	48.3134	43.7152	46.9337	44.5631	44.6837	36.6478	40.5464	45.3059	43.4002	45.2754	9.53008	4.55465	8.60732	17.0204	97.9431	43.9225	90.7238	31.547	4.38889	26.5533	39.1276	26.8386	6.22745	21.6323	38.6671	3.04444	7.83218	38.3385	6.30935	12.1	35.9477	12.6185	12.7919	5.82187	9.65269	10.2691	13.8972	28.073	5.28693	5.82137	9.0225	4.86003
ESI+	172.071	0.862	HMDB0000341	2-Octenedioic acid	C8H12O4	172.074	14	2446.94	1412.07	2327.62	2274.31	1973.04	2268.51	1916.8	2165.04	2103.24	2355.47	1917.79	1448.15	933.219	1564.91	1815.98	1152.98	1123.83	1608.28	2893.88	1772.97	2573.4	1463.72	2359.74	2322.13	3908.08	2338.83	2932.84	2332.32	1900.79	2345.62	2988.9	1546.85	2744.53	2756.36	2319.62	2521.3	2186.56	2548.83	2326.86	2756.63	2396.39	2547.28
ESI+	172.086	0.733	HMDB0000721	Glycylproline	C7H12N2O3	172.085	9	45.5382	43.5338	50.902	58.1665	37.6624	42.9727	33.0102	72.6334	37.617	53.0327	74.983	69.5616	64.2099	58.1958	55.0125	57.0336	59.5045	52.261	66.7428	66.4216	66.0095	73.3633	71.9257	58.0781	57.0627	91.0533	40.5784	92.4545	46.8566	55.3651	46.0519	41.562	63.0238	46.3523	50.7134	52.4316	50.9404	56.5053	54.2317	49.2285	44.3117	52.6254
ESI+	173.105	2.149	HMDB0000701	Hexanoylglycine	C8H15NO3	173.105	0	30.6328	30.3867	29.0909	31.3339	33.7061	37.0275	31.3437	41.2391	41.9637	27.1174	4.64892	13.4832	6.98782	7.82778	13.8165	11.4686	4.97801	4.38671	6.28855	13.9396	11.5932	8.6085	14.3899	4.61274	6.15312	10.9159	9.06602	12.6436	10.0439	6.23363	14.3429	4.34623	15.3577	4.3538	7.81595	7.62375	9.48414	6.7299	9.46485	9.93564	9.33766	11.0874
ESI+	174.112	0.813	HMDB0000517	L-Arginine	C6H14N4O2	174.112	1	136.124	474.376	369.063	364.148	366.574	408.971	338.269	397.526	361.865	592.265	323.627	405.17	310.215	193.534	206.899	324.947	242.133	278.161	161.385	330.325	430.582	357.197	518.7	174.712	335.939	526.597	347.143	404.822	310.272	653.19	455.321	363.857	756.742	405.511	531.986	513.096	381.719	555.926	342.698	559.111	565.79	485.563
ESI+	175.058	1.393	HMDB0003157	Guanidinosuccinic acid	C5H9N3O4	175.059	5	27.6899	28.8054	30.859	27.4589	19.34	20.7045	19.8681	29.7909	29.9601	31.3475	63.842	30.1498	49.0995	30.269	43.9925	35.0588	7.89183	30.7875	28.4622	25.9281	36.0878	11.5012	39.2923	33.3672	33.7241	28.9423	41.9358	26.46	15.6521	32.4242	21.8799	33.2067	32.6647	27.0973	29.8629	29.4278	24.3077	32.3909	43.7678	32.7844	22.4697	16.9654
ESI+	175.063	3.39	HMDB0000197	Indoleacetic acid	C10H9NO2	175.063	0	3.56363	2.67978	2.70794	3.276	4.18611	3.62783	3.06645	5.10975	2.95343	5.96319	7.4383	7.74702	8.03863	5.41419	2.93011	1.01349	7.73281	3.42852	23.9062	13.0376	6.54329	1.52219	3.46653	3.06037	3.69104	9.55692	7.89382	7.78176	6.87382	11.171	4.34873	4.08548	2.11092	2.10185	6.80741	2.59864	4.54772	3.14182	3.47183	5.02625	6.34425	8.58508
ESI+	176.032	1.247	HMDB0000044	Ascorbic acid	C6H8O6	176.032	1	15.7702	18.368	15.567	13.2664	15.3299	13.7273	12.9399	16.7898	14.584	16.595	13.0134	4.34081	2.48463	3.7765	9.28135	6.77689	0.897106	11.0366	2.35822	0.906899	4.08471	22.0765	13.614	24.3778	2.864	29.1475	5.09515	30.9566	36.9464	17.5584	13.9122	12.6988	5.21416	4.69893	11.937	18.117	14.2482	5.10289	2.15427	28.2127	10.0783	2.46119
ESI+	176.054	0.72	HMDB0001209	Allantoic acid	C4H8N4O4	176.055	5	13.2783	14.8844	11.622	17.51	14.5529	16.512	8.81329	18.4367	16.8989	16.9748	20.7338	19.734	14.2368	24.1966	11.4974	23.5104	14.3804	16.7938	16.9212	18.387	17.645	23.1034	22.0186	22.7698	18.653	23.4695	4.4011	8.31474	16.6723	20.7515	18.222	19.6621	26.3482	11.3991	14.3477	16.5931	10.1286	18.9039	20.8485	12.0294	13.366	21.8225
ESI+	176.095	1.842	HMDB0001046	Cotinine	C10H12N2O	176.095	1	510.979	544.808	587.207	534.379	547.315	519.698	538.442	574.6	626.707	612.703	10.5681	10.293	32787.7	12.1227	9.31511	10.8854	3.48132	12.2497	16.8527	12.4221	17.4993	4.57988	10.4383	16.8316	12.6957	10.8239	19.0993	5.1551	13.6096	13.0185	11.2939	15.7927	15.4156	8.06871	7.8631	10.8712	7.76904	8.75079	10.1336	19.0627	2.70733	21.214
ESI+	177.082	3.207	HMDB0001855	5-Hydroxytryptophol	C10H11NO2	177.079	18	2.06864	1.36056	2.34111	1.14762	1.08176	1.13453	0.990232	2.06958	1.32279	1.29208	1.33501	3.03768	1.85521	1.02629	0.961575	3.7296	1.13047	1.02556	1.78876	1.53151	1.55754	1.21724	1.11032	1.08622	1.38859	1.18732	0.926585	1.34117	0.897798	0.979502	1.03227	34.4712	1.11634	3.33475	0.946158	0.9541	0.942895	0.88968	1.09837	1.06665	1.67468	1.32537
ESI+	180.045	1.292	HMDB0001087	5-Methylthioribose	C6H12O4S	180.046	2	92.8234	89.3707	91.9859	93.5377	81.0443	86.5232	83.3623	90.6211	88.6834	86.9804	95.5788	107.227	115.967	215.362	93.2314	90.1772	36.2919	67.3565	94.6899	63.2743	72.9612	103.08	138.65	98.8382	134.142	132.134	85.3069	88.026	71.7662	227.071	67.1574	128.52	60.5802	84.2869	119.522	131.146	95.1965	52.1887	110.107	87.1233	114.499	117.781
ESI+	180.065	1.918	HMDB0001889	Theophylline	C7H8N4O2	180.065	1	75.8082	72.0944	72.9693	78.6993	75.2371	67.9758	65.3986	84.2132	77.7945	75.5715	2.45112	5.19672	706.422	1.80777	2.40815	8.65873	1.92258	9.45895	645.924	256.066	392.939	2.144	3.25469	107.504	76.5164	7.65271	1.57226	2.30367	1.88802	11.2015	52.2695	1.88809	3.99955	112.072	36.9317	38.8623	3.15877	1.97223	878.516	374.596	213.101	246.234
ESI+	181.074	1.258	HMDB0000158	L-Tyrosine	C9H11NO3	181.074	0	214.518	216.958	238.132	210.375	214.664	207.689	200.699	236.006	229.997	231.436	345.026	221.199	382.665	287.919	215.508	263.553	117.425	236.895	358.447	346.762	499.615	120.342	404.527	249.485	259.713	197.769	280.251	190.741	145.409	272.482	230.748	344.144	338.675	242.686	316.664	287.471	196.004	216.656	324.348	236.867	124.137	388.881
ESI+	182.055	0.728	HMDB0000755	Hydroxyphenyllactic acid	C9H10O4	182.058	14	81.7214	72.2566	62.91	82.8003	51.1214	74.199	63.5854	69.2194	69.1062	65.6203	147.079	144.329	101.505	113.884	119.903	113.855	97.1736	74.2358	115.417	154.254	80.8928	103.58	109.007	121.739	146.232	91.4735	54.6667	64.3923	62.0101	62.0961	88.2769	101.209	84.079	79.718	112.661	114.616	91.1969	85.8373	96.1954	87.7274	64.4444	110.286
ESI+	183.978	14.512	HMDB0001024	Phosphohydroxypyruvic acid	C3H5O7P	183.977	5	2152.02	2141.9	2121.03	2092.01	2392.31	2228.78	1596.86	2275.38	2136.59	2305.16	2302.52	2921.63	1952.95	2475.82	2250.2	2145.16	1842.42	2362.28	2257.52	2804.92	2469.11	2846.92	2836.95	1402.04	2577.43	2349.07	2422.15	2287.82	2802.1	2260.14	2623.96	2525.47	2737.09	2233.67	2178.37	1781.02	2199.19	2246.44	3062.96	2959.93	2224.24	2923.35
ESI+	184.035	0.775	HMDB0013198	4-O-Methylgallic acid	C8H8O5	184.037	13	64.7181	65.1478	54.2475	58.0181	43.4864	59.9996	56.0545	66.4769	68.4219	81.7397	111.672	91.6393	74.9221	79.8475	65.2752	73.6953	42.0024	57.7233	100.814	95.8099	125.292	75.111	123.298	140.79	180.454	256.891	86.8261	40.3694	30.0481	66.0824	54.9162	66.5153	67.8772	61.0708	53.3227	72.1827	23.0833	52.6375	111.831	64.0322	54.1775	71.564
ESI+	185.036	14.502	HMDB0001330	2-Amino-3-carboxymuconic acid semialdehyde	C7H7NO5	185.032	22	12.7661	14.8246	15.1676	10.667	13.2507	8.89148	9.50471	11.0819	15.1928	16.3488	13.1693	19.9192	14.8405	18.5956	18.033	18.6282	27.0018	17.1685	14.4152	13.4374	10.971	16.2169	20.4685	20.1487	12.8575	17.2748	12.7634	13.6644	13.0304	12.1982	15.1891	9.91267	17.0435	13.7423	8.4715	16.6193	11.3064	9.01728	17.8581	15.6312	12.151	17.613
ESI+	187.121	2.476	HMDB0013010	N-Heptanoylglycine	C9H17NO3	187.121	1	125.684	146.64	141.342	129.906	140.268	157.457	142.433	137.597	134.853	148.876	29.803	33.0796	56.8802	35.386	84.173	34.2639	31.3726	22.9863	47.3283	43.8159	35.6335	20.4703	13.5099	18.7432	24.0291	25.1063	12.9183	51.2312	15.8405	19.4083	40.323	55.9449	67.5662	42.8118	56.3815	69.7348	36.3917	46.9106	21.9082	26.6295	46.4198	41.8592
ESI+	188.105	9.503	HMDB0000784	Azelaic acid	C9H16O4	188.105	0	30.5734	32.0366	26.5345	30.3782	33.1487	28.399	26.8476	29.0267	33.6585	31.4816	35.9955	34.717	29.3457	33.6809	30.8781	25.3997	37.3275	32.0985	39.9477	37.8764	24.9705	38.9571	28.2454	35.9051	47.5198	43.7904	29.3787	24.1843	25.9457	33.4231	45.7979	33.4688	38.4862	23.6476	29.3611	35.6696	29.565	28.1669	28.6422	34.0748	32.8248	29.7001
ESI+	188.152	0.738	HMDB0001325	N6,N6,N6-Trimethyl-L-lysine	C9H20N2O2	188.152	1	56.6586	36.1921	35.2457	37.2255	41.6256	52.6038	46.4746	48.1797	58.8282	60.6167	59.52	54.6285	56.7126	59.8417	60.0127	49.4625	37.4152	81.0043	59.1067	63.9544	74.9212	47.977	66.9824	60.206	47.4004	64.2384	50.1102	38.6334	38.2223	73.5093	43.255	31.3507	55.3751	58.3202	42.9474	46.1468	48.2941	40.3315	52.8772	49.7933	58.3201	28.4508
ESI+	189.043	8.709	HMDB0000715	Kynurenic acid	C10H7NO3	189.043	0	30.7371	52.4548	23.1625	45.3774	47.4337	46.3647	36.2919	42.6935	45.2714	48.5113	45.103	52.8945	39.3859	60.1148	34.7718	54.2047	52.7303	50.8307	54.0536	66.3976	53.7954	42.6257	41.0765	50.6697	39.2116	53.142	27.894	43.5201	34.1491	44.7964	34.8114	43.621	53.2234	34.2094	41.6238	36.4037	37.205	39.936	46.5667	45.1243	40.9238	45.8499
ESI+	190.097	0.73	HMDB0029054	Threonylalanine	C7H14N2O4	190.095	7	105.393	95.9103	97.4562	89.4313	114.263	77.7939	87.7532	106.902	72.6038	76.2505	140.104	160.493	75.5566	149.583	141.493	102.088	105.942	90.8938	81.1908	146.966	137.371	121.467	105.446	117.288	114.463	145.163	108.89	180.801	123.412	92.1796	111.387	92.4922	119.438	120.778	77.3043	101.482	161.592	117.594	87.2451	101.802	113.512	91.9097
ESI+	192.027	1.249	HMDB0000094	Citric acid	C6H8O7	192.027	1	849.143	921.007	1034.4	782.846	1019.04	848.375	869.095	978.908	1071.77	1029.65	2047.18	769.491	1278.48	1046.63	1250.21	1259.02	693.097	905.008	985.831	1496.76	1026.88	1259.19	1416	938.76	972.204	1091.58	919.544	790.902	721.147	783.083	1194.71	945.877	1227.89	718.186	903.022	720.263	626.77	928.17	1027.57	753.575	670.436	1193.57
ESI+	194.08	2.195	HMDB0001847	Caffeine	C8H10N4O2	194.08	1	265.295	272.809	273.807	246.515	265.757	263.736	246.976	286.054	262.609	263.376	11.9469	5.17534	6342.75	2.02526	2.24583	6.03808	1.0188	14.0612	2000.1	476.932	1128.28	1.10235	7.69382	206.484	188.884	19.0431	0.825454	15.1	0.921618	23.8934	51.7454	1.00465	12.1025	411.948	40.661	121.556	3.92145	0.828842	1581.33	819.522	885.771	873.799
ESI+	195.09	3.081	HMDB0014903	Metyrosine	C10H13NO3	195.09	0	2.87175	2.07893	2.22901	2.52238	2.46803	1.18405	1.58765	1.37062	2.99389	1.76327	1.23196	1.35576	5.0488	1.87957	1.23515	1.97134	2.24975	1.13599	1.2764	1.48985	1.30689	1.66931	1.28081	2.93152	2.32303	1.71722	1.02171	1.55839	1.16582	1.1905	1.35335	1.28524	1.29853	1.13231	1.10428	1.25538	1.60451	1.10544	1.21729	1.25166	1.18665	1.35447
ESI+	200.102	2.017	HMDB0034491	Camphoric acid	C10H16O4	200.105	15	19.0099	18.1634	17.3425	13.4912	11.6437	12.0828	11.7382	14.5433	12.8481	11.2794	4.62508	6.56787	21.8413	4.61855	11.4019	13.1149	1.29027	18.6046	11.828	8.49897	16.0608	4.95205	18.2536	18.2014	14.9211	11.0327	15.8986	9.58117	5.68928	21.2913	10.8659	13.8602	10.8957	30.7609	17.4397	9.5858	12.2196	14.1157	14.7886	15.3914	11.3749	10.6385
ESI+	202.12	3.783	HMDB0059719	Heptylmalonic acid	C10H18O4	202.121	1	20.2399	28.2699	18.8004	19.6604	21.8601	17.6583	16.1327	19.0184	20.5613	17.4222	26.1401	24.9282	22.4238	28.8697	21.2324	21.4315	23.0883	22.3674	28.4603	28.8988	23.0675	27.2055	26.3495	21.9191	22.7504	20.7184	26.6765	32.3098	23.0241	21.0548	23.2874	27.3156	23.3071	18.469	22.1569	18.5098	19.2536	19.603	18.4412	22.485	20.3814	30.505
ESI+	203.116	0.822	HMDB0000201	Acetylcarnitine	C9H17NO4	203.116	0	180.486	192.456	206.407	154.897	167.57	163.262	136.094	144.713	171.216	140.628	278.53	9.82034	203.992	206.762	281.608	42.2084	172.322	449.717	3.31968	2.92332	57.7751	158.439	91.2247	111.3	5.38365	57.8553	71.7969	83.8886	85.2839	89.1991	13.0413	8.3795	11.4688	133.196	19.5563	105.185	69.7884	141.583	7.94597	29.7	68.0115	3.40033
ESI+	204.079	8.707	HMDB0028819	Glutamylglycine	C7H12N2O5	204.075	19	1044.28	1352.72	1412.31	1217.68	1304.71	1321.67	1883.55	2304.01	1515.8	1646.22	1608.49	2676.08	1282.52	1519.89	2220.72	1257.82	1654.79	1729.8	1708.13	1908.92	1561.78	2141.97	1707.42	1669.01	1692.3	1600.39	1072.66	1953.07	1317.93	1122.4	1207.72	1392.05	2237.51	1303.63	2300.15	1339.72	1802.63	1332.42	1714.78	1998.88	1304.78	1257.97
ESI+	204.09	1.932	HMDB0000929	L-Tryptophan	C11H12N2O2	204.09	2	583.876	494.856	551.672	533.219	551.336	544.337	546.462	560.617	590.458	620.308	689.349	788.913	825.736	953.179	729.756	809.485	138.347	628.488	1173.19	986.543	1142.59	22.9158	827.06	712.973	816.798	515.871	844.9	405.112	401.48	735.926	607.873	1195.99	914.225	809.162	784.263	852.816	696.744	595.445	779.814	424.315	616.705	1027.11
ESI+	205.059	1.132	HMDB0000962	Lipoamide	C8H15NOS2	205.06	4	3.94577	3.9314	4.84872	4.00193	3.82957	4.33913	3.77746	4.08942	4.37467	4.45511	6.14701	5.48354	5.22334	5.0125	5.08738	5.75862	4.79527	4.7442	5.1558	6.29755	4.7954	5.4169	5.68507	4.74688	5.49298	5.03248	3.75105	4.39331	3.66881	4.00772	4.35288	4.67415	4.31174	4.17568	3.90222	4.17251	3.85534	4.00568	4.37278	4.20458	3.76286	5.36212
ESI+	205.97	1.5	HMDB0015210	Etidronic acid	C2H8O7P2	205.975	23	14.5764	15.0394	11.7818	12.9904	14.0102	15.5532	22.3679	18.6104	15.035	14.3195	48.1864	26.8777	14.8522	22.1585	70.2169	25.5668	1.42269	10.9965	25.5592	21.773	7.53347	7.52052	10.8578	12.5944	21.9035	12.7607	18.2853	6.92046	17.0325	9.86062	18.1837	32.6041	11.3702	12.402	12.4245	11.8294	19.9172	14.5991	23.648	14.9683	16.3347	10.6957
ESI+	208.081	8.695	HMDB0000684	Kynurenine	C10H12N2O3	208.085	18	18.5313	23.4238	25.1929	44.1707	35.8195	38.5062	44.5823	39.3001	40.87	48.1828	50.1037	39.2814	34.2964	44.5683	46.5059	43.7381	48.979	50.2612	40.6573	43.7757	48.6375	57.9677	45.8711	36.8029	40.4752	41.5857	26.4464	38.0142	27.0285	31.7522	42.354	37.2588	48.7746	46.3172	36.5876	47.1018	44.4506	35.7121	43.2312	46.2484	35.9336	51.1478
ESI+	215.152	3.288	HMDB0013279	N-Nonanoylglycine	C11H21NO3	215.152	1	47.7283	50.0826	45.501	18.0613	46.7031	44.7895	46.0301	49.767	50.8428	51.7216	61.4613	69.9771	82.1301	59.4614	109.914	82.9392	64.0424	50.016	101.558	64.4903	66.0608	57.568	54.5213	56.487	144.438	69.5839	45.9744	89.5714	40.138	60.5221	134.162	75.2438	26.5184	63.5803	85.8077	128.315	72.6301	141.253	68.3202	115.654	112.272	65.7806
ESI+	215.943	0.648	HMDB0014470	Nitroprusside	C5FeN6O	215.948	24	6.71027	10.3414	13.7474	10.817	10.8572	9.60839	9.13776	10.2304	11.8146	12.2343	11.7559	7.59947	10.771	28.4922	35.1483	12.1312	23.6541	11.3905	6.56505	9.26472	11.1556	21.4239	19.9142	14.3007	13.2413	11.1927	7.39298	5.13913	7.72303	6.91066	4.57574	5.37301	5.53129	4.56852	5.30581	7.08154	4.5601	10.3596	7.2018	2.68634	7.12179	5.70247
ESI+	217.131	0.825	HMDB0000824	Propionylcarnitine	C10H19NO4	217.131	0	12.3666	14.7288	14.2029	15.6882	13.4937	13.5218	14.0169	13.0516	14.3175	13.2565	31.4181	2.34885	21.265	14.2378	89.0818	12.3813	11.092	30.9655	0.732241	0.730676	8.08284	8.49497	9.59479	20.2161	2.89677	8.49221	10.8051	7.04857	7.68749	6.22032	3.86023	5.04716	4.15192	9.26092	3.54431	16.3446	7.6164	15.4014	4.11251	6.3656	7.5174	0.658307
ESI+	219.11	1.769	HMDB0000210	Pantothenic acid	C9H17NO5	219.111	1	14.2962	14.0215	16.4712	14.1773	14.2438	14.0589	15.2335	16.7757	14.5705	20.6185	21.3606	15.2669	32.4072	28.5403	13.5797	17.4381	20.4341	18.4844	32.9565	22.1771	43.4084	8.50233	22.7581	14.1111	27.4716	19.6802	31.7238	9.7982	9.88972	16.339	25.7335	19.2607	8.52911	12.1996	15.0124	8.08957	10.293	13.6965	20.7436	17.4032	13.6864	8.2075
ESI+	220.085	1.523	HMDB0000472	5-Hydroxy-L-tryptophan	C11H12N2O3	220.085	1	4.3633	5.53213	6.98506	4.05392	4.66215	4.83799	5.68037	5.55137	3.92323	6.66462	218.837	2.40374	4.53214	3.30544	2.26963	2.2451	2.16802	2.91344	2.08397	2.41817	2.71155	5.06471	4.29966	3.12107	3.02271	2.34881	5.50794	2.14808	1.80234	1.77959	7.56387	3.05475	2.39651	1.79789	1.77028	1.73354	2.68985	2.8109	2.16946	2.89575	1.79251	1.86646
ESI+	228.133	14.458	HMDB0000933	Traumatic acid	C12H20O4	228.136	12	8.88897	5.18922	10.5779	9.43933	7.57384	7.39889	6.08536	7.1755	11.5864	6.48847	9.99099	7.23776	8.78693	5.48141	8.36813	5.90512	10.6565	9.87609	10.6119	5.26899	9.68155	7.06539	7.92364	6.86501	10.156	6.46763	7.69263	10.411	9.06331	14.1476	9.26359	6.54527	10.6761	12.7828	8.15116	8.66093	10.7871	8.14952	8.7614	11.7122	8.82131	7.56277
ESI+	229.168	3.781	HMDB0013267	Decanoylglycine	C12H23NO3	229.168	1	22.6196	23.5111	20.1988	18.8279	22.3817	20.8817	17.8095	19.2179	23.9799	19.7166	18.825	32.0324	33.8361	21.0071	44.7289	34.4134	20.4903	11.0071	47.9076	23.6125	20.9422	14.0231	18.23	21.4026	47.6148	27.1772	24.3954	35.4954	13.1029	28.1451	56.092	34.5676	19.8697	19.5355	27.8737	32.9073	29.6113	37.2336	33.8376	33.8641	38.1681	39.8383
ESI+	230.152	6.99	HMDB0000623	Dodecanedioic acid	C12H22O4	230.152	1	22.7136	16.9462	22.0614	15.0567	18.9686	14.4537	13.5614	17.1475	31.2587	22.456	47.036	18.1943	14.9583	26.5288	21.0808	19.7174	23.4087	22.5023	30.0064	29.1783	18.9673	40.1473	34.1765	23.6568	27.3365	35.1041	20.4157	19.9988	17.1825	31.5121	31.0998	21.3716	21.9553	21.2784	19.9362	18.4005	22.6287	16.6683	22.5248	19.0403	15.3804	23.5487
ESI+	231.147	1.781	HMDB0002013	Butyrylcarnitine	C11H21NO4	231.147	0	42.1319	29.5922	42.2653	34.6115	42.0557	40.9305	42.0623	45.077	39.5765	46.1161	156.99	17.9308	65.3568	41.1727	100.377	24.5971	5.53372	62.1125	22.0363	12.057	21.4038	21.5211	71.293	39.8007	23.2849	16.4385	37.1163	14.3276	11.9504	24.1488	36.0614	29.0353	19.0753	30.5109	18.6034	37.2298	12.2431	26.3693	33.9851	27.7467	18.8683	8.64568
ESI+	232.085	3.48	HMDB0015305	Phenobarbital	C12H12N2O3	232.085	1	1.54744	1.76913	1.32113	1.79926	0.775137	0.713424	0.768387	0.802717	1.42387	1.67675	0.914391	0.980212	19.032	0.894369	0.845751	0.851767	1.07244	0.964408	0.963692	1.17704	1.02234	1.06736	0.969578	0.995363	1.03102	0.979184	0.834313	0.916732	0.768089	0.860616	0.888935	0.878168	0.95982	0.816747	0.839513	0.831204	0.813222	0.756783	0.924648	0.936351	0.725677	0.928088
ESI+	233.124	10.357	HMDB0013125	Hydroxypropionylcarnitine	C10H19NO5	233.126	8	5.44268	7.55726	5.56537	4.13387	6.38991	3.37957	4.02676	1.54327	4.64078	2.75495	0.525843	0.778408	1.55165	1.21119	2.83551	0.643607	2.50728	3.90785	1.22897	0.822858	1.86521	1.06138	1.90665	2.24151	0.468275	1.53865	5.01145	4.29016	3.42057	3.7739	3.70087	1.30677	0.591829	3.16675	3.10658	1.49556	2.86902	2.7152	1.51987	2.47039	2.43093	0.967579
ESI+	234.162	0.285	HMDB0035794	beta-Costic acid	C15H22O2	234.162	1	131.064	104.233	116.82	3.32294	106.433	3.1119	2.86826	3.30077	128.843	3.48844	3.87481	173.379	119.928	4.33735	3.7408	3.60215	144.54	154.815	153.408	6.52034	142.656	4.33469	5.61625	145.451	10.1052	158.573	3.39939	136.812	3.41476	3.4104	154.228	155.455	4.01872	3.71573	132.53	3.58264	3.65979	126.394	3.7413	145.062	116.768	3.6465
ESI+	234.173	2.33	HMDB0014426	Lidocaine	C14H22N2O	234.173	1	4194.76	4399.43	4474.34	4074.51	4133.81	4133.22	3915.74	4544.72	4443.64	4758.77	1461.85	15311.3	3771.49	3903.47	307.646	87013.1	5167.36	499.67	55878.3	1703.91	137.237	393.255	6087.97	369.24	247.957	12689.3	28888	17563.5	7423.34	219.369	242.678	304.636	2395.4	1213.66	386.694	216.41	5621.03	1868.12	602.474	946.186	15059.5	4266.49
ESI+	236.102	0.734	HMDB0006239	aminomethyldihydrolipoamide	C9H20N2OS2	236.102	2	7.42256	9.52475	7.62696	9.44423	11.129	6.75805	6.59153	11.7264	8.64665	13.7085	15.9234	24.4086	15.0248	14.9283	14.342	14.7465	13.9112	10.5463	9.95362	16.4087	18.6559	21.4361	16.4558	16.2471	26.0437	21.3451	7.93565	11.9503	11.8736	6.66033	9.28508	8.9065	10.8723	10.1642	11.8963	8.94234	9.38482	9.75952	7.49375	13.2393	7.92706	8.54203
ESI+	243.183	4.315	HMDB0013286	N-Undecanoylglycine	C13H25NO3	243.183	1	211.466	212.134	230.063	215.147	202.713	215.248	200.074	222.881	206.128	225.797	367.783	823.373	1422.89	283.188	1677.31	1387.86	414.135	253.594	1867.25	627.107	837.123	238.366	406.703	473.564	1348.09	971.404	401.066	1701.82	193.804	1143.51	2546.56	1795.93	585.965	984.591	1176.3	1751.89	1007.22	1879.09	737.408	1434.52	1968.93	1407.96
ESI+	244.069	1.245	HMDB0000296	Uridine	C9H12N2O6	244.07	0	24.2092	26.066	34.5001	19.0967	23.5825	18.8506	28.5901	31.1492	34.554	32.914	42.8335	39.6145	43.67	39.7804	36.2215	34.1683	14.4928	34.3063	37.6182	42.0756	38.6677	25.301	51.8249	31.7601	51.4216	36.1455	35.7676	23.3338	25.4145	23.5938	30.5001	25.2504	24.3693	29.5701	24.4856	23.7544	26.4434	30.15	28.9125	23.9843	24.5906	24.676
ESI+	244.167	8.126	HMDB0002327	1,11-Undecanedicarboxylic acid	C13H24O4	244.167	1	17.5305	15.6968	13.893	18.0999	16.5343	13.1243	13.8835	24.0596	20.6588	28.3677	23.9713	27.8134	18.8939	19.881	19.3708	21.8253	21.5411	29.8021	19.8311	27.3963	23.9645	29.7721	27.1537	24.1395	21.069	25.6528	14.1448	18.782	17.1829	20.9366	15.1412	20.2456	21.7171	18.4871	18.824	19.7119	19.8459	18.4442	16.3462	19.4527	15.8236	24.3486
ESI+	245.163	2.087	HMDB0013128	Valerylcarnitine	C12H23NO4	245.163	1	27.0459	31.8619	28.2179	28.6978	27.2233	27.7868	27.424	33.8022	30.4343	29.7888	106.383	15.2658	44.7712	35.5798	67.0665	37.6546	5.19936	28.8736	25.5003	10.8471	45.0613	9.032	26.1734	36.4075	17.9475	29.2473	37.4979	13.1793	6.53008	30.668	34.3997	25.3879	26.9788	23.5246	14.0268	18.3411	8.9999	22.0703	38.3319	30.4024	17.2812	13.3847
ESI+	250.118	0.729	HMDB0002012	Ubiquinone-1	C14H18O4	250.121	11	22.2524	24.7096	21.6764	23.0145	25.5391	20.1494	18.4527	35.4398	37.6584	32.1389	49.0649	61.2709	32.9429	46.0361	37.4424	53.2893	42.8077	30.666	29.5951	38.9961	43.2321	31.5276	47.9763	40.981	45.693	40.1273	23.8364	27.6367	28.1456	26.1255	28.318	20.0642	24.2484	25.4905	21.8351	26.764	28.3008	25.8633	42.0266	28.7132	22.679	29.1922
ESI+	252.089	3.457	HMDB0000071	Deoxyinosine	C10H12N4O4	252.086	13	4.98916	6.14683	6.7681	5.67786	6.17821	5.80264	5.38224	7.39717	6.36636	7.51553	2.8143	3.15169	2.45747	2.78598	2.59062	2.58471	3.30074	2.96824	2.98593	3.62267	3.14653	3.25759	3.08967	3.06351	3.14203	3.01168	2.56783	2.8215	2.36401	2.64879	2.74455	2.70281	2.95412	2.51377	2.52815	2.55826	2.47535	2.32921	2.84586	2.88189	2.20743	3.05418
ESI+	253.816	0.838	HMDB0000675	Iodine	I2	253.809	28	2637.03	3318.41	3418.84	3452.48	2797.01	2135.47	2043.01	3300.51	3258.78	2683.35	1557.62	4326.47	2876.96	3804.03	1995.54	3340.66	814.275	3290.74	3788.93	2483.56	3416.7	3879.06	2681.12	4003.37	2415.51	3333.21	3299.29	3066.03	3001.1	3777.61	3859.99	3047.35	4111.66	4098.42	3859.61	4209.08	3807.27	2793.39	2643.19	4014.07	3581.6	3485.63
ESI+	254.224	7.64	HMDB0003229	Palmitoleic acid	C16H30O2	254.225	1	24.8146	16.288	17.7331	18.5325	19.687	18.0889	13.9318	15.6342	13.5382	13.3234	8.4646	23.0467	5.17276	8.86661	8.76183	10.1063	6.06182	8.39285	22.1353	10.5242	8.76126	9.57287	20.8296	2.35276	11.8701	10.1281	9.65369	14.9418	10.6829	7.00928	17.1646	12.1304	15.5175	16.7851	11.7298	17.2262	14.3616	12.1507	9.33087	10.4013	2.46605	14.3311
ESI+	255.256	10.031	HMDB0012273	Palmitic amide	C16H33NO	255.256	1	217.135	287.16	272.449	280.004	317.978	258.954	268.838	296.387	330.821	277.04	541.297	532.374	310.843	730.51	742.551	297.113	770.836	402.579	570.556	515.15	588.588	336.768	377.49	372.624	353.71	202.758	544.184	433.23	389.318	501.709	407.581	465.606	716.767	263.965	357.634	633.808	603.116	341.105	350.565	457.226	645.311	780.038
ESI+	257.102	0.875	HMDB0000086	Glycerophosphocholine	C8H20NO6P	257.103	1	116.564	839.611	148.7	591.447	136.057	986.585	953.621	848.246	987.287	999.228	1797.87	3154.57	1013.09	1076.9	654.959	1883.17	636.336	980.504	938.318	4880.96	1426.32	1776.3	410.568	843.287	841.591	1298.86	580.456	703.869	360.162	1052.22	906.927	909.472	2053.73	695.938	674.782	727.605	963.154	671.631	4081.55	1274.6	748.565	1050.57
ESI+	258.087	3.798	HMDB0000884	Ribothymidine	C10H14N2O6	258.085	5	0.578653	0.563224	0.505852	0.483564	0.621243	0.502145	0.520939	1.5042	0.615724	0.630373	0.638514	0.683914	73.9597	0.641665	0.591488	0.591746	0.728298	0.633643	0.726057	0.796728	5.91962	0.763119	0.694152	0.656148	0.721074	0.701598	0.570186	0.60693	0.551401	0.608106	0.618971	0.62449	0.679291	0.589992	0.561864	0.572803	0.572932	0.543232	0.630814	0.627319	0.51143	0.657324
ESI+	258.183	8.456	HMDB0000872	Tetradecanedioic acid	C14H26O4	258.183	1	24.0254	23.7348	28.4044	36.5291	28.1103	29.6748	25.0633	28.7878	27.4161	30.2869	37.6986	37.0141	27.8965	37.5555	31.1507	27.2937	34.3084	31.9981	38.7869	39.0566	35.0581	41.6999	32.6892	31.0678	26.5016	32.0143	25.664	38.0438	26.7259	24.6	27.8788	31.1882	31.9693	25.391	31.8124	29.3297	25.6206	29.3676	34.1357	34.8851	34.3227	39.5168
ESI+	264.111	2.329	HMDB0004259	Acetyl-N-formyl-5-methoxykynurenamine	C13H16N2O4	264.111	0	5.18086	6.61113	6.58231	6.23693	6.61895	5.80675	5.97936	4.8044	6.99705	8.43011	7.17876	3.20149	33.3363	23.3489	12.0858	12.6175	2.56634	13.6463	9.08396	2.55439	6.60777	7.87616	13.2449	8.34175	2.48075	2.68305	5.446	3.28705	4.04125	3.56911	10.9225	2.73262	1.29129	2.08485	4.46161	3.53567	3.67124	2.22704	5.13761	1.53814	3.08912	1.59989
ESI+	268.08	1.429	HMDB0000195	Inosine	C10H12N4O5	268.081	2	13.8304	16.8736	17.1859	14.6561	15.8065	16.5998	14.3409	16.5445	17.4722	17.1001	13.4297	16.9881	26.396	15.1674	13.8288	20.3011	5.96245	7.98231	23.5693	22.3017	22.7132	8.27626	18.3964	17.6554	39.9614	34.3006	16.4459	11.6792	15.2161	25.8321	15.1879	18.5977	16.9571	16.6792	17.1472	16.2718	14.7541	25.7698	22.3002	25.7459	27.454	33.4851
ESI+	270.1	2.744	HMDB0028881	Histidylaspartic acid	C10H14N4O5	270.096	13	3.30945	4.00312	3.36629	3.16927	2.30558	2.91762	2.29777	3.28578	3.39901	3.9792	1.2922	1.32861	1.10987	1.31505	1.16115	1.20853	1.37958	1.18352	1.30864	1.67583	1.35491	1.46574	1.33033	1.24243	1.39303	1.43557	1.09948	1.27375	1.06317	1.1155	1.24703	1.26541	1.37168	1.15697	1.08062	1.19202	1.10398	0.995688	1.24208	1.25497	0.96931	1.25948
ESI+	270.219	7.991	HMDB0010733	3-Oxohexadecanoic acid	C16H30O3	270.219	1	50.6229	35.4374	40.348	40.8616	42.8048	50.7692	45.5036	41.7058	42.3348	40.7405	48.9371	30.5867	27.8995	39.2093	53.0362	31.0901	43.5867	23.391	41.3235	40.2563	34.2474	35.5766	48.8929	35.5667	51.355	36.8412	42.8625	44.4275	56.5601	34.3449	41.0723	50.1616	41.6893	33.6332	51.062	35.3449	47.0417	34.4274	46.2391	33.6726	51.3543	51.7288
ESI+	270.256	0.397	HMDB0002259	Heptadecanoic acid	C17H34O2	270.256	1	231.619	199.963	199.534	191.939	8.3974	10.9968	17.3487	14.8413	234.008	15.8707	6.79053	6.33357	22.8373	22.8834	318.34	3.47053	322.988	275.712	15.2538	14.8464	25.3339	27.3806	26.7112	284.154	18.4882	20.91	2.98482	271.412	15.2767	19.907	6.81345	31.2822	264.942	15.2662	2.96472	228.976	239.037	10.7807	217.472	268.311	216.545	7.74018
ESI+	271.214	5.439	HMDB0013317	Tridecanoylglycine	C15H29NO3	271.215	1	4.95996	4.50961	5.23582	4.74448	3.77328	4.51605	4.11695	5.61052	5.60806	6.12175	7.65235	16.0925	30.7123	9.14709	43.2752	36.5032	14.168	7.15817	62.2298	18.0016	21.5398	8.25036	10.1504	12.2822	53.463	25.7425	7.29871	32.9994	5.02256	17.1716	67.0168	36.9643	11.2806	17.5839	17.9408	32.1809	21.8555	36.0472	12.9793	31.3228	32.1085	35.6098
ESI+	278.151	8.689	HMDB0013835	Diisobutyl phthalate	C16H22O4	278.152	2	15089.1	19683.7	17898.8	21613.3	25387.4	25160.9	23540.3	29334.2	32535.2	27544.6	28564	27836.9	23309.8	30934.7	28297.5	25745.4	29619.3	27783.7	28484.4	32597.7	33647.6	34977.3	31011.8	30645.6	33665.4	25980.6	21483.8	22667	20623	20289.7	23758.6	24016.7	27760.4	25300.9	25821.3	25369.2	25369.2	24503.8	27039.8	23730.3	24253.1	26690.5
ESI+	278.224	7.878	HMDB0001388	alpha-Linolenic acid	C18H30O2	278.225	2	6.0296	6.32757	6.65713	4.2118	7.56439	5.06636	6.06681	6.3873	3.66508	8.09102	26.7426	26.9245	9.68987	23.1322	12.7963	8.43265	18.1394	7.95601	11.0869	14.1588	13.8414	14.8573	15.8422	11.0533	26.8073	10.7304	20.7647	7.60515	13.5478	9.00743	14.99	8.45054	34.0365	14.3421	16.0883	7.45669	16.7004	6.85885	14.2057	13.1249	10.7466	12.265
ESI+	279.256	9.482	HMDB0062656	Linoleamide	C18H33NO	279.256	2	89.2531	98.8301	81.5937	89.6725	95.503	89.4249	88.5418	90.681	105.163	96.0377	162.951	142.28	112.155	368.648	237.831	81.5581	280.018	98.993	75.5229	139.171	95.414	163.205	143.87	202.771	175.008	70.0138	88.5841	114.368	142.288	86.8124	79.8275	85.9236	171.517	86.2246	127.202	61.0635	94.1788	118.347	175.416	74.8339	72.6343	112.467
ESI+	280.24	8.265	HMDB0000673	Linoleic acid	C18H32O2	280.24	2	8.5851	7.45121	8.51898	10.7722	7.66475	6.48381	6.18571	6.40662	6.7194	6.2977	5.57904	7.43096	5.24259	8.75766	5.95144	4.94867	10.8393	8.82387	8.34967	7.40689	6.11599	7.23275	8.50786	6.33452	7.35922	5.487	10.4462	10.8855	12.6786	11.8197	9.75374	8.75341	9.87008	14.9496	9.90312	9.2898	13.1201	7.45193	12.4837	14.9242	10.5573	8.82683
ESI+	281.271	10.28	HMDB0002117	Oleamide	C18H35NO	281.272	2	196.698	312.07	223.844	257.814	291.378	252.959	269.405	240.319	326.993	296.571	379.603	182.231	112.268	629.197	342.623	88.7479	786.913	173.05	124.849	199.741	142.281	333.524	281.79	376.706	287.528	111.64	158.73	296.611	158.253	140.406	148.232	125.233	440.608	122.138	302.106	219.314	160.132	215.213	258.734	120.101	155.942	135.995
ESI+	282.256	8.861	HMDB0000207	Oleic acid	C18H34O2	282.256	1	16.3795	6.64885	9.47557	9.70965	5.51176	8.07685	8.29582	9.23892	8.5286	9.24439	2.89193	39.9509	2.37335	5.41905	11.8695	3.89599	7.2367	5.74451	8.64823	7.79383	4.73111	5.5687	6.12156	8.93758	12.0587	5.30206	5.33479	5.05312	5.95952	6.83973	16.5255	5.48675	6.33994	9.01061	5.47519	5.63128	6.14943	14.2027	9.5004	6.36311	5.52894	8.16423
ESI+	283.287	11.179	HMDB0034146	Octadecanamide	C18H37NO	283.288	2	248.71	349.956	291.337	253.905	313.388	275.943	318.67	308.561	391.423	354.925	296.671	274.68	211.926	414.165	764.606	260.771	713.705	174.043	223.042	216.396	212.123	265.375	212.947	221.042	390.7	154.27	170.91	273.562	144.822	172.941	281.9	235.073	418.504	121.397	200.776	223.549	259.442	182.064	191.442	154.685	234.627	276.921
ESI+	284.147	0.63	HMDB0000372	16-Oxoestrone	C18H20O3	284.141	21	16.6578	16.9883	14.0926	14.2405	12.3782	14.8546	15.2079	16.1671	18.3263	19.2691	27.2131	17.9351	23.1472	24.7793	26.7934	22.5879	23.7099	18.7892	16.2177	23.4113	19.8985	23.5377	24.2579	20.439	24.0139	27.0608	17.361	13.3949	13.1441	16.7484	14.3377	15.9473	18.8478	14.3085	14.2625	19.3777	11.0038	14.236	16.0644	19.1821	14.0639	14.6231
ESI+	285.136	6.126	HMDB0014440	Morphine	C17H19NO3	285.136	3	1.50295	2.36148	1.47198	1.96089	1.87793	2.00782	1.51326	2.56097	1.85102	2.67423	1.08298	3.73928	8.51483	0.98123	0.900434	0.857354	1.06177	0.97453	1.07871	1.1361	2.34854	1.09819	1.01533	2.47347	1.11899	1.08407	0.858198	0.879565	0.902734	0.912656	0.901012	1.01556	1.03322	0.82711	0.908523	0.823612	0.844793	0.972761	0.951558	0.899414	25.4657	24.7857
ESI+	286.214	9.577	HMDB0000672	Hexadecanedioic acid	C16H30O4	286.214	1	324.341	328.207	364.092	473.739	503.31	674.663	499.243	769.124	837.795	983.253	976.028	1078.55	798.926	1233.32	952.84	790.643	1239.54	1056.94	971.207	1217.22	1246.3	1209.82	1059.66	1015.17	1134.06	906.909	395.692	502.733	510.673	497.266	469.794	554.665	579.342	467.329	541.365	569.483	652.834	684.885	733.349	687.43	662.015	745.306
ESI+	288.24	4.318	HMDB0037798	(S)-10,16-Dihydroxyhexadecanoic acid	C16H32O4	288.23	36	0.612631	0.659603	0.625414	0.60936	0.961093	2.10421	1.99521	2.9906	3.63662	3.92943	7.08851	22.7342	38.9504	7.38069	46.5197	36.6315	11.0404	4.71097	33.5685	12.941	17.056	4.77068	5.60839	7.80083	26.6962	21.3113	0.982329	8.59643	2.01302	5.64302	16.7176	10.5846	2.79528	6.39757	8.66455	15.0136	9.0428	22.2039	6.89221	15.724	27.0882	15.5452
ESI+	292.167	9.218	HMDB0035687	Acetylvalerenolic acid	C17H24O4	292.167	1	6.60812	6.55312	6.25403	3.73048	4.62686	6.32267	6.58831	7.83915	7.94755	7.39262	6.79364	6.71697	5.71779	4.78455	6.57909	6.98853	6.73306	3.74549	5.47989	7.60852	6.49198	7.45492	6.4577	6.7476	8.8082	6.09572	3.0827	4.32278	4.72821	2.77461	3.38843	4.90214	7.74075	4.97806	3.42178	4.32512	3.40876	4.37332	5.20899	5.27464	3.46884	6.32738
ESI+	294.219	4.994	HMDB0004669	9-OxoODE	C18H30O3	294.219	1	7.82541	6.59617	8.90863	8.70267	8.92333	10.8759	6.7651	7.63488	8.98661	12.5114	1.19155	0.911453	0.70081	0.829912	0.959624	10.2848	0.872042	3.47943	8.69929	17.7792	4.01566	6.09216	54.2277	6.11239	5.86872	0.93905	5.63586	3.8488	1.19793	7.10601	21.6543	12.3444	10.7039	10.2245	8.29387	7.51351	7.20964	7.53911	15.7553	3.72131	11.1803	20.6369
ESI+	296.235	8.847	HMDB0004702	12,13-EpOME	C18H32O3	296.235	2	23.247	26.341	27.5184	24.6805	29.7898	24.9683	23.8798	27.9127	26.5852	34.8099	42.4638	47.409	28.3005	50.6727	45.0994	41.298	49.8229	27.4586	52.4248	41.4975	36.6894	36.06	46.4263	39.5477	55.7922	42.3649	41.4469	40.31	48.6666	20.3928	43.8108	18.306	76.096	63.0531	44.1425	46.4754	50.5204	30.1304	44.8443	38.3695	65.3251	40.4751
ESI+	298.25	9.131	HMDB0034297	Ricinoleic acid	C18H34O3	298.251	1	48.8444	45.3984	44.4417	50.1831	60.6763	63.122	59.3038	47.2646	57.1077	51.3321	39.4969	41.7888	16.7775	38.0694	69.9721	28.0816	37.7536	29.0698	42.2464	37.0522	28.7219	41.5332	40.518	47.2861	91.887	31.8242	29.1415	39.9295	26.7427	42.0967	39.6642	46.3468	52.5866	35.052	24.7353	39.8404	32.7658	31.7031	51.1781	27.1084	27.228	39.9686
ESI+	299.282	9.549	HMDB0002100	Palmitoylethanolamide	C18H37NO2	299.282	1	7.21578	10.7414	10.1515	10.4492	6.48233	7.86267	7.07583	7.45071	7.95859	10.1181	11.8647	10.2553	7.8944	12.9201	18.3377	5.82328	18.1146	7.96941	15.3638	13.322	11.731	8.48572	10.8009	6.05601	7.69382	11.0791	11.9352	6.67835	5.53165	7.01417	10.4589	11.1053	10.6596	10.2823	7.25013	6.13843	6.16866	11.3113	14.4928	9.77825	8.08265	9.3773
ESI+	300.204	10.937	HMDB0001852	Retinoic acid	C20H28O2	300.209	17	8.26589	7.54349	9.10162	12.7702	11.78	14.2342	11.5664	12.9486	13.516	11.549	20.5029	19.4452	15.9828	19.7172	21.1749	20.8166	13.8181	15.5078	19.8284	18.6574	13.7325	13.1212	16.6797	17.5901	26.3978	17.9799	10.7659	8.71337	6.50033	9.31613	9.05548	13.233	10.0336	9.53383	10.1476	8.26008	13.7318	12.894	15.3961	15.0358	12.5153	14.703
ESI+	300.266	8.868	HMDB0062549	2-Hydroxystearic acid	C18H36O3	300.266	1	19.4019	6.28826	8.28166	7.5664	6.26942	8.03246	7.68778	8.05223	10.3412	9.68585	3.78771	53.4265	3.82941	5.8146	8.28379	3.90411	8.00236	4.23144	9.50697	7.4619	5.88169	6.73519	5.89952	7.31899	12.9031	4.44441	5.41113	4.7366	6.29778	7.09228	19.7116	5.66731	4.68679	10.2821	6.80057	6.29589	5.74497	11.7041	7.41522	6.8194	6.47666	9.4156
ESI+	301.298	5.534	HMDB0000269	Sphinganine	C18H39NO2	301.298	1	493.408	499.379	500.625	477.067	456.752	477.717	474.147	508.405	506.442	500.659	158.223	170.278	137.833	166.38	345.805	160.742	187.253	180.589	289.299	242.332	155.155	194.284	182.129	179.48	211.712	170.612	199.791	151.871	149.68	133.272	138.407	164.48	150.106	142.536	123.435	113.391	181.231	143.109	157.047	136.35	136.209	145.421
ESI+	302.245	9.168	HMDB0011561	1-Monoacylglycerol	C17H34O4	302.246	1	7.36527	6.77748	9.03264	9.18101	9.02475	8.5744	7.94541	9.50257	11.755	7.90896	6.27089	2.21927	5.0959	8.71289	9.31233	2.83797	7.00844	8.13762	2.30019	2.0581	3.95408	6.36089	4.50721	5.96316	2.63884	6.66505	5.24543	5.04238	4.17572	5.7848	2.91933	2.45435	2.40424	5.4667	4.13713	4.92114	5.5878	4.81592	2.21515	4.29503	5.14586	2.16214
ESI+	304.09	1.341	HMDB0001067	N-Acetylaspartylglutamic acid	C11H16N2O8	304.091	2	31.7013	35.1204	34.8806	26.6999	33.2933	36.9543	27.8396	33.0935	36.6966	34.9214	16.7254	98.475	23.3829	44.9716	13.4106	54.2875	57.3172	32.2014	26.7956	39.7705	32.6039	12.9244	30.5678	47.9408	48.2369	43.1312	86.0033	19.9078	20.6832	16.8345	16.8038	40.5297	16.283	54.3922	23.7461	36.3962	70.0045	20.8758	30.8231	65.1288	39.2659	36.6584
ESI+	309.106	0.817	HMDB0000230	N-Acetylneuraminic acid	C11H19NO9	309.106	1	16.2759	15.244	15.5411	13.6478	14.8764	14.5465	17.9108	15.2165	12.4248	12.8693	14.1505	25.9001	14.7016	12.1353	9.02523	15.864	30.8037	16.3025	18.9977	26.288	18.6498	9.27141	27.1839	13.3692	18.7381	25.237	11.0802	21.8946	16.3304	9.76959	13.0801	10.7215	16.9447	12.4383	15.963	8.52253	8.09967	13.6423	15.8894	21.2728	16.3133	16.7004
ESI+	312.227	0.733	HMDB0010201	12,13-DiHODE	C18H32O4	312.23	10	15.5554	14.1154	11.8986	16.1895	13.3387	12.942	14.5154	15.3172	16.3467	19.2492	12.0171	26.8868	14.2336	13.3929	13.2513	22.8173	13.6182	19.5543	20.7375	23.4345	11.9602	16.3158	15.3946	19.3995	30.4039	15.7806	12.3089	18.256	18.9045	14.7002	12.3078	13.6052	16.9321	19.6793	13.9941	13.9475	19.8808	13.5739	17.4307	13.1546	18.7496	17.6792
ESI+	314.245	10.479	HMDB0004705	12,13-DHOME	C18H34O4	314.246	2	126.842	147.234	231.475	151.173	125.443	183.628	206.724	196.892	157.024	248.366	134.418	218.637	130.716	113.895	207.867	109.417	181.962	187.666	229.023	139.566	161.225	209.108	140.519	128.511	205.28	209.136	213.205	200.826	150.402	139.276	113.313	203.152	239.863	164.449	225.005	196.696	175.503	236.669	184.269	244.436	146.491	150.844
ESI+	316.261	7.236	HMDB0059633	(9S,10S)-9,10-dihydroxyoctadecanoate	C18H36O4	316.261	0	9.5889	8.71775	9.88836	8.98572	8.38045	10.0117	9.26265	10.4294	9.7974	9.64179	5.97198	5.32815	3.10734	4.54445	5.13782	9.87546	5.19605	8.12329	13.1596	15.2046	9.00136	12.9251	45.469	11.027	18.8563	4.43103	8.10238	7.26066	4.20458	8.61667	17.966	15.5279	16.9601	13.7375	14.2391	13.9309	9.52009	9.67565	18.1843	12.4912	12.6558	15.5242
ESI+	317.293	4.733	HMDB0004610	Phytosphingosine	C18H39NO3	317.293	1	490.731	465.841	539.961	497.428	510.145	493.73	445.788	521.188	475.166	502.694	250.752	276.404	216.793	274.154	650.301	286.681	308.287	292.659	414.691	402.424	249.42	324.852	310.631	288.079	352.939	292.12	333.496	240.111	234.065	211.441	234.566	281.808	248.201	451.199	248.901	224.679	324.892	265.955	254.318	238.869	242.727	254.939
ESI+	324.163	3.331	HMDB0005038	Citalopram	C20H21FN2O	324.164	1	2.44777	2.13818	2.57263	2.38756	3.06261	2.94588	1.95529	2.73776	3.45438	3.07378	0.548534	0.585659	0.434446	0.570746	0.497232	0.52571	0.60234	0.534947	0.57696	0.710898	0.573362	0.63259	0.576321	0.550277	0.60392	0.558021	0.489938	0.542103	0.455368	0.508249	0.538796	0.528909	0.564308	0.50053	0.472142	0.528787	0.486177	0.460006	0.555559	0.535925	0.42721	0.548891
ESI+	324.214	2.564	HMDB0014439	Etonogestrel	C22H28O2	324.209	11	8.07277	5.17694	11.279	6.49912	7.44276	6.26867	5.62903	19.0331	10.1862	61.5101	366.685	445.321	407.658	310.137	1079	642.998	1418.83	283.812	867.508	264.087	588.541	662.107	367.598	738.078	1244.43	495.611	512.734	246.046	1179.89	464.823	565.662	400.999	388.153	138.167	629.402	441.486	489.6	494.6	958.07	1319.75	480.229	340.413
ESI+	326.193	2.074	HMDB0059915	4-Dodecylbenzenesulfonic Acid	C18H30O3S	326.192	5	33.7348	35.4468	31.4635	32.4574	31.5644	28.7998	30.7696	29.6001	30.6456	33.5433	14.8155	9.28807	12.7234	19.3431	45.3978	25.557	20.313	11.4813	21.4328	20.6579	16.9577	27.2359	15.7916	43.4489	55.1074	23.6393	16.459	20.2243	15.7703	31.7762	22.9656	24.4413	21.1294	33.4824	19.7584	11.5961	12.5333	17.3531	675.994	27.5213	25.8447	41.5556
ESI+	327.095	1.595	HMDB0010316	Acetaminophen glucuronide	C14H17NO8	327.095	1	0.912927	0.910156	0.922807	0.932502	0.826761	0.797429	0.822431	0.915309	0.929219	1.0149	1.12422	1.15098	60.5532	1.12636	1.01972	1.02914	1.18903	1.11964	1.15581	1.35319	1.10957	1.27556	1.11704	1.10273	1.2294	1.22092	0.928123	1.19131	0.925097	0.967321	1.11091	1.02466	1.18824	0.982076	0.856623	0.991584	0.941383	0.958935	1.06638	1.07457	0.95493	1.03857
ESI+	328.235	12.256	HMDB0002183	Docosahexaenoic acid	C22H32O2	328.24	16	20.824	26.0483	22.5584	23.9408	23.7755	22.354	24.6083	24.1436	25.691	26.9288	24.8508	27.6997	19.0645	31.3441	20.2241	19.7262	23.7344	22.3707	27.9098	31.0377	25.4348	21.9779	29.2618	24.6643	36.4601	25.8996	25.8544	24.0527	22.7834	25.3087	32.3807	31.6696	24.0728	28.5856	23.9717	26.9254	23.9272	24.3758	30.4122	26.35	23.4804	24.5079
ESI+	329.22	6.492	HMDB0013202	6-Keto-decanoylcarnitine	C17H31NO5	329.22	2	603.296	487.899	657.625	687.043	677.882	662.935	651.891	707.914	679.36	692.087	2.31592	2.41635	16.2812	12.9176	7.04866	2275.64	4.86127	631.215	192.173	146.62	314.816	1473.62	77.2032	1850.09	1472.93	9.9666	144.297	78.7921	102.71	185.133	1621.45	116.876	906.546	2191.61	258.324	497.101	147.289	1216.71	1064.95	1241.97	2632.04	457.974
ESI+	330.24	5.087	HMDB0004710	9,10,13-TriHOME	C18H34O5	330.241	2	43.4422	54.5809	63.1815	48.7754	43.7078	45.4026	46.1813	37.9445	35.5211	44.1212	3.78479	2.90965	3.0603	2.53432	4.07618	31.8303	4.35874	20.7613	40.9776	51.9923	30.1801	28.9296	228.805	37.219	53.5961	4.10649	39.8969	18.1052	12.5534	37.2526	103.357	74.869	61.1534	72.9194	44.4446	28.0589	40.4847	44.1989	91.17	30.3835	61.346	94.006
ESI+	330.276	10.362	HMDB0011564	MG(16:0/0:0/0:0)	C19H38O4	330.277	2	255.876	318.478	276.256	276.434	325.79	297.36	252.713	288.893	307.544	341.898	176.265	70.5559	145.302	171.482	390.057	121.224	205.868	232.222	59.6718	31.8861	148.327	208.205	116.552	164.062	83.8503	153.921	155.52	132.222	149.744	163.858	71.4483	66.3527	81.0461	132.175	100.001	110.413	155.431	146.085	53.2822	106.286	98.2186	28.5819
ESI+	352.258	10.363	HMDB0011569	MG(18:3(6Z,9Z,12Z)/0:0/0:0)	C21H36O4	352.261	9	173.84	194.717	188.335	182.703	202.797	183.029	145.395	190.687	208.956	208.503	122.62	50.6828	104.112	121.336	245.985	86.5955	145.466	149.094	45.3702	26.8957	105.009	144.066	88.1561	114.178	63.4032	104.095	98.2867	81.2621	102.06	104.714	52.1044	47.2829	59.8288	91.0454	69.2261	75.64	96.7245	97.2848	38.2102	76.9597	69.0531	21.9665
ESI+	354.274	10.043	HMDB0011568	1-O-Linoleoylglycerol	C21H38O4	354.277	9	11.948	12.8779	12.3235	13.8579	11.9494	11.188	14.8454	14.7779	23.0197	14.9964	15.3223	18.8415	12.6011	21.764	14.6224	21.4227	15.3339	15.2915	17.3503	16.8798	17.3811	14.8755	14.377	14.6462	15.8267	17.6343	12.2739	18.635	11.1641	13.576	13.8918	13.8428	16.3624	17.491	12.1959	15.8655	17.0342	14.3047	14.2673	17.0803	13.93	22.7133
ESI+	357.194	8.688	HMDB0030213	(S)-Laudanosine	C21H27NO4	357.194	1	41.8178	37.7429	41.1831	65.1807	50.137	54.2594	54.2103	71.4243	70.1185	100.21	176.752	168.93	172.943	133.092	132.647	140.37	139.714	78.0609	113.814	91.7675	89.703	109.941	97.6866	122.312	207.73	239.938	41.1856	46.8289	51.4319	56.5227	59.613	64.4046	59.103	59.245	60.5227	63.9617	54.5914	63.0418	69.2685	47.3727	68.8537	73.2364
ESI+	358.308	11.487	HMDB0011131	1-Stearoylglycerol	C21H42O4	358.308	2	316.082	321.594	339.711	328.21	333.311	253.45	289.116	316.816	410.642	374.58	198.622	130.666	173.796	209.56	506.36	155.467	260.451	256.794	83.5667	41.5088	180.837	225.655	155.417	184.439	92.2862	167.61	127.669	131.885	152.344	176.039	77.572	92.728	79.8111	163.987	109.016	115.87	180.421	139.776	64.7621	128.897	168.216	26.929
ESI+	359.316	12.863	HMDB0035516	5-Decanoyl-2-nonylpyridine	C24H41NO	359.319	8	98.4346	88.4471	85.015	103.667	86.6049	91.4838	94.7371	107.015	109.847	99.0073	429.129	383.384	266.934	390.365	530	201.791	469.359	180.927	418.127	403.495	190.822	344.808	242.979	217.083	322.234	172.929	265.32	141.094	312.887	227.27	286.467	192.009	340.132	169.676	278.545	175.756	254.932	287.402	285.082	326.427	201.314	379.846
ESI+	362.209	3.767	HMDB0000063	Cortisol	C21H30O5	362.209	2	8.96933	8.85756	8.15778	9.35374	6.99165	7.87729	7.0357	9.26068	8.96042	9.16397	12.9849	4.08159	15.4225	4.89996	13.9505	8.57706	1.92456	4.84008	6.51235	14.7835	4.33935	6.05827	8.13619	3.84766	8.39033	13.6706	15.9769	5.70203	7.71676	8.16288	16.1657	13.6328	4.58269	5.89311	6.16329	3.75025	11.0027	12.4116	8.38469	12.0677	8.18613	8.64076
ESI+	366.142	1.618	HMDB0240296	Tryptophan 2-C-mannoside	C17H22N2O7	366.143	1	28.8762	30.3894	35.2592	30.2663	35.4631	32.0532	33.7711	36.301	37.4272	36.5161	26.7388	43.8415	31.9332	39.7565	20.0772	33.5867	8.67916	29.2638	41.7358	47.4864	49.9552	23.9331	46.6014	29.6864	49.2318	60.0781	35.3247	22.9195	19.1194	27.9578	30.6135	22.4194	36.1986	35.1785	34.3311	20.6915	18.1234	24.8452	38.1406	37.7849	35.5835	26.9946
ESI+	370.233	5.705	HMDB0003252	Thromboxane B2	C20H34O6	370.236	7	0.762189	0.784858	0.758432	0.71891	0.753779	0.740943	0.713214	0.809806	0.839718	0.892278	3.07298	2.26936	4.40384	2.0257	6.89616	8.83318	7.50617	17.4404	10.0661	2.90998	11.5946	12.569	15.983	14.5873	1.96024	10.486	4.91469	3.836	6.33076	5.90718	5.91784	18.5041	2.11757	1.11564	3.21026	8.68901	5.39786	3.13793	12.1612	5.40773	5.21563	10.804
ESI+	380.29	11.483	HMDB0011577	MG(20:3)	C23H40O4	380.293	8	154.223	144.298	175.201	177.206	174.199	143.281	161.979	179.182	208.889	201.813	117.464	83.028	106.585	137.704	244.777	101.233	144.821	152.987	60.6995	31.9932	113.807	144.821	95.1805	109.893	56.6445	107.757	75.5094	82.8933	85.5541	109.018	51.3541	57.4125	51.5506	93.0987	67.2046	76.5466	99.6976	77.801	43.034	85.3742	100.022	19.9934
ESI+	383.107	1.695	HMDB0000912	Succinyladenosine	C14H17N5O8	383.108	1	64.3257	70.816	75.8772	74.2707	66.8974	68.4642	65.0736	74.0746	76.6144	72.5225	86.9972	80.0891	71.8215	100.307	51.1274	83.8107	34.3598	51.7428	92.7904	107.335	124.853	66.9861	90.5982	78.3276	114.708	115.796	74.1018	45.823	57.1887	83.3224	57.6027	60.5813	93.9215	95.5243	64.9745	45.841	52.5916	57.1207	97.3442	87.4678	71.3021	65.7099
ESI+	384.124	0.812	HMDB0000939	S-Adenosylhomocysteine	C14H20N6O5S	384.122	6	48.5247	36.0278	48.638	40.9048	52.0693	46.6813	49.0653	43.9798	46.6899	47.1881	225.647	141.261	99.5831	57.9718	46.5088	31.9474	11.5258	69.3715	59.1753	46.5039	62.5789	25.2532	67.09	63.9119	30.1132	50.5251	87.8665	28.7926	24.5386	106.221	22.9242	80.3792	26.7784	42.4821	32.2075	39.9704	45.4695	53.0796	25.7131	55.2233	12.435	50.579
ESI+	385.319	10.682	HMDB0062517	Pentadecanoylcarnitine	C22H43NO4	385.319	2	110.071	100.987	76.3931	115.795	107.022	131.763	114.557	147.678	131.265	183.614	201.243	160.071	176.821	184.739	444.602	145.899	217.48	167.586	193.046	223.709	195.123	178.64	192.277	174.137	240.163	183.273	184.975	115.899	89.9924	119.879	160.631	137.545	148.161	129.546	129.601	127.342	285.639	177.658	188.207	136.76	196.275	142.673
ESI+	390.276	12.519	HMDB0000460	7-Hydroxy-3-oxocholanoic acid	C24H38O4	390.277	2	1813.51	1811.14	1649.88	1728.37	1704.44	2271.45	1980.93	2241.8	1910.25	2299.61	2137.65	2134	1754.09	2204.29	2127.29	2043.66	2582.33	2574.04	2322.15	2771.53	2103.61	2412.72	2032.26	2487.01	2529.65	2176.5	2144.83	2151.22	2104.13	2187.56	2289.77	2316.99	2380.68	2193.59	1823.47	2202.31	1824.25	2184.3	2447.31	2385.78	2207.15	2370.56
ESI+	391.28	12.704	HMDB0240595	N-Stearoyltaurine	C20H41NO4S	391.276	10	277.694	255.897	80.907	346.691	71.0385	96.9712	77.0665	66.0415	95.7867	82.797	64.5343	379.835	93.0122	333.38	323.581	69.5672	402.73	378.02	334.326	379.098	59.2216	73.0747	337.062	350.182	332.096	76.0822	324.552	83.1144	76.2667	328.65	376.795	326.778	406.836	357.732	310.073	85.0863	302.646	342.112	61.9791	346.237	60.9698	65.5543
ESI+	392.29	12.212	HMDB0000626	Deoxycholic Acid	C24H40O4	392.293	7	20.7516	23.0349	22.2857	19.5967	19.6742	17.8817	12.8454	19.5628	18.5384	22.1728	8.94013	15.2987	9.09257	17.6624	21.8576	11.1381	20.2484	11.409	18.8751	11.2591	21.9825	9.721	12.7379	17.4999	21.2504	16.0283	20.7218	19.7124	23.0808	24.7383	23.1754	25.0645	24.9753	25.9031	23.23	22.7681	16.7473	20.4345	26.468	22.0126	16.7602	23.6554
ESI+	411.238	4.328	HMDB0003752	LysoPC(10:0/0:0)	C18H38NO7P	411.239	1	724.244	725.962	804.898	769.447	752.903	740.559	736.856	774.832	765.857	833.111	790.069	349.325	718.258	868.354	752.027	454.305	1024.86	1032.47	207.453	127.162	686.178	1073.92	755.695	1008.24	282.731	873.166	619.168	799.679	799.548	871.251	441.839	340.906	373.839	985.246	521.098	809.615	851.789	931.217	207.004	589.166	820.326	154.917
ESI+	416.328	11.856	HMDB0060425	7a,25-Dihydroxycholestenone	C27H44O3	416.329	2	9.17698	13.5859	12.868	9.30333	8.08911	8.04048	7.83144	9.17089	8.65663	8.1424	7.77495	8.6908	6.13535	8.90466	8.03405	6.52714	5.82739	7.93227	7.6106	8.33431	7.899	8.52768	8.18037	7.12213	8.68065	9.40717	10.0285	12.1832	8.52246	11.2975	11.4719	10.6625	10.6918	10.8231	9.65931	11.0323	9.35872	10.1342	8.32624	9.27802	9.63689	9.50477
ESI+	423.246	11.92	HMDB0011501	LPE(14:1)	C19H38NO7P	423.239	18	9.93561	9.52325	8.46753	11.0036	7.09724	6.60247	6.99286	7.95578	8.92486	11.6237	9.62084	11.0825	7.31718	11.7893	8.90081	10.3939	11.0881	10.7825	9.50383	11.7863	9.72608	11.5904	10.9845	10.1969	10.9866	8.49697	8.55714	11.8014	8.78293	8.25095	11.6053	9.7543	10.4401	10.572	7.96919	10.4141	7.03544	9.94927	10.4367	9.8621	11.6143	12.0515
ESI+	425.254	4.832	HMDB0011500	LPE (14:0/0:0)	C19H40NO7P	425.254	1	111.877	106.648	124.517	120.136	121.742	115.039	101.23	115.106	108.686	116.655	113.084	52.8906	105.699	130.656	109.256	65.1418	159.206	153.928	30.659	16.7538	100.729	168.863	108.202	162.411	44.2039	140.021	100.483	133.128	131.882	128.542	56.3157	40.3987	52.0187	151.768	72.5491	133.842	118.383	130.988	30.1422	86.4745	128.57	17.9925
ESI+	430.308	7.945	HMDB0011590	MG(24:6)	C27H42O4	430.308	1	33.6486	31.9583	32.6299	32.424	33.1431	36.2036	32.9694	38.5265	39.7065	38.4779	54.4781	16.1522	27.9682	34.1538	43.024	27.3351	4.31545	20.2531	45.5516	25.8906	48.0106	21.094	78.8778	27.3845	30.3962	31.8677	40.8359	9.84704	10.9932	21.1604	88.686	25.3436	41.2909	18.1288	17.7777	17.9233	15.6258	36.7422	38.6181	22.728	22.3138	22.8107
ESI+	430.377	10.68	HMDB0001893	Tocopherol	C29H50O2	430.381	11	9.09912	6.48331	9.76302	13.7775	10.8421	18.0204	16.3948	26.1786	20.8269	29.8531	52.1771	32.0378	41.9962	43.2725	111.302	42.3897	62.332	30.4267	38.9266	44.0362	37.563	38.7992	35.6774	37.3244	45.0611	34.2166	13.8387	8.80121	10.3954	10.3399	13.0387	13.623	13.9957	12.2477	13.9411	11.4298	34.8665	21.0482	19.8043	14.3576	25.8282	19.9082
ESI+	431.273	2.237	HMDB0061045	alpha-hydroxysalmeterol	C25H37NO5	431.267	13	15.402	16.1796	14.7893	17.2594	14.8702	14.5054	14.6025	16.2535	15.5023	15.7869	10.0328	6.04824	6.97949	11.2915	25.2118	19.5692	9.89986	7.52502	13.1632	12.8637	10.7579	21.0149	9.42028	29.4035	31.2744	15.412	8.99582	8.46151	9.99572	14.5448	14.9344	10.6947	9.93259	19.6171	10.9652	6.65149	11.0271	9.28754	320.709	14.4245	14.2939	28.5269
ESI+	434.242	1.845	HMDB0007856	LPA(18:2)	C21H39O7P	434.243	2	2.6278	1.37048	2.17152	1.9251	3.40297	2.61217	2.26427	3.43738	3.74884	4.62108	0.729999	0.780163	1162.62	0.731933	0.684925	0.646867	0.77884	0.698336	0.730187	0.873573	0.762134	0.812144	0.664654	0.690418	0.797219	0.780678	0.620614	0.711388	0.584266	0.635987	0.686882	0.64697	0.738486	0.650306	0.571602	0.641747	0.62704	0.590641	0.729129	0.686355	0.553114	0.725969
ESI+	439.269	5.15	HMDB0011502	LysoPE(15:0/0:0)	C20H42NO7P	439.27	2	32230.2	30015.1	49256.8	44848.1	45861.6	47271.7	44548.6	41737.2	38096.9	28938.1	29308.8	16170.6	26511.4	32179.1	28704.2	25977.4	38565.5	36389.8	10294.1	6282.64	27782	38548.4	28764.4	35805.5	20035.9	34256.7	28499.4	33128.8	51811.1	31816	18948	23662.4	25578.9	54558.8	31179.4	32985.8	47164.6	53015.8	12106.4	37762.4	44510.7	6509.98
ESI+	444.153	2.785	HMDB0014399	Doxycycline	C22H24N2O8	444.153	1	10.3052	10.2564	8.74388	9.08658	9.79861	7.65599	8.17484	9.171	7.82329	8.93938	1.52288	2.06144	1.32536	3.62812	180.812	1.87565	1.66442	1.85216	1.44332	1.92047	1.86629	3.26265	5.27068	4.91563	2.37849	2.14736	1.95249	4.78068	2.37559	1.33686	3.94961	2.49475	1.68045	1.53725	3.9405	1.79379	1.31563	1.23776	1.45424	3.16641	1.22935	3.36386
ESI+	444.319	9.14	HMDB0011560	MG(24:6)	C28H44O4	444.324	12	1408.28	1402.63	1500.77	1402.88	1535.97	1534.55	1369.44	1741.2	1548.05	1609.42	5.59721	5.6047	4.64377	5.91335	5.77126	7.83892	5.83016	5.56455	6.58563	6.2178	5.21751	5.87782	5.73921	5.56256	18.0012	5.64908	4.60561	4.96118	4.82037	4.93301	481.046	5.09594	5.32166	8.48605	4.93875	4.90101	4.447	30.3832	5.05791	5.23989	4.67229	24.4192
ESI+	450.355	9.508	HMDB0003555	Vitamin K1	C31H46O2	450.35	12	108.546	111.464	142.535	118.253	146.102	166.449	169.587	134.833	177.664	154.789	44.8325	35.0623	51.7476	60.0144	57.2619	162.679	40.0765	91.6253	137.256	96.3791	94.2331	73.0914	33.0362	130.303	172.647	115.759	98.2032	61.8997	83.399	166.415	156.246	155.412	103.18	190.788	113.923	108.842	49.1879	62.1298	81.5763	111.443	131.826	224.357
ESI+	453.285	5.888	HMDB0011503	GPE(16:0)	C21H44NO7P	453.286	1	185.231	194.948	210.925	196.629	194.467	196.997	179.721	204.354	190.476	205.081	193.491	86.5761	185.851	244.636	184.472	115.202	262.369	283.842	54.0507	34.9489	163.601	297.192	186.817	278.113	80.1765	253.02	165.287	208.848	185.951	233.085	112.104	70.0676	90.3553	240.779	132.879	202.275	210.954	230.449	52.3464	155.91	214.316	36.4187
ESI+	461.346	9.156	HMDB0000596	Glucosylsphingosine	C24H47NO7	461.335	23	988.987	992.042	1035.66	943.482	1045.45	1034.02	913.758	1213.25	1071.46	1062.11	1.34738	1.34918	1.11491	1.42348	2.1286	1.13707	1.40345	1.33951	2.20352	1.49677	1.25668	1.41493	1.30507	1.28956	12.7776	1.36849	1.10867	1.19427	1.16037	1.35049	368.065	1.23385	1.29069	4.69145	1.18887	1.17979	1.07049	21.0853	1.21638	1.26136	1.12473	20.2111
ESI+	464.361	10.682	HMDB0002163	Trihydroxycoprostanoic acid	C28H48O5	464.35	24	1.18457	0.985224	1.21977	1.33745	0.834809	1.26488	0.952459	1.47457	1.67826	2.30709	5.37937	4.70213	4.38708	4.9231	9.43069	3.89594	6.45075	2.95169	4.74999	2.32914	2.76536	3.37115	3.32143	2.54272	6.76262	7.52727	1.8715	1.57216	1.49081	0.558013	3.35066	1.69568	2.00202	1.15786	1.44832	1.10037	4.35525	2.62411	2.16109	1.8345	1.86521	1.60266
ESI+	465.322	9.246	HMDB0000138	Glycocholic acid	C26H43NO6	465.309	27	11.044	11.8636	11.8604	10.1594	10.7997	12.3117	10.3093	12.4907	11.9079	13.4309	16.802	42.8452	8.77647	4.57075	2.29509	38.8936	2.57868	5.60247	41.9211	60.8982	49.7944	5.6492	41.6196	17.1704	65.1683	31.8689	17.7004	8.12217	4.80177	6.01475	35.2233	23.8876	49.9191	8.78412	18.016	7.93156	9.12305	11.0783	37.8764	25.1314	11.8451	43.8161
ESI+	467.301	6.443	HMDB0010379	LPC(14:0)	C22H46NO7P	467.301	1	217.051	213.061	242.422	281.772	238.563	235.866	218.093	240.037	242.434	235.911	260.368	114.508	241.24	278.322	230.326	145.359	343.238	340.353	74.7193	47.5478	223.735	354.383	242.386	327.851	99.5166	293.833	198.266	248.67	271.577	265.235	152.472	97.8972	117.757	292.906	152.111	259.623	250.229	274.379	71.232	175.293	264.656	45.3978
ESI+	473.265	9.707	HMDB0011510	LPE(18:4)	C23H40NO7P	473.254	24	26.7918	25.5542	25.4871	24.406	22.9279	25.3513	22.5504	25.0786	24.5736	31.641	25.9673	10.0548	40.1103	97.8688	77.1584	8.22703	33.4825	13.2423	17.3688	15.6936	18.7933	24.0338	37.4659	43.9939	97.3629	28.6797	9.86612	21.7638	11.583	16.1408	23.1312	33.9235	26.0166	19.6615	14.9463	8.28117	11.1351	17.9914	20.8208	8.3522	5.77541	16.9474
ESI+	475.267	5.893	HMDB0011509	LPE(18:3)	C23H42NO7P	475.27	7	12.4454	13.9618	14.0692	12.4492	13.7584	14.2298	11.8208	13.5549	10.9463	13.7175	14.9101	6.22444	11.3926	17.2148	13.5444	7.84254	16.5839	20.7713	2.90841	1.69805	10.9293	17.1974	11.6694	19.1968	4.42177	15.9276	13.0101	11.2963	14.5069	17.0951	6.92157	4.18469	4.45122	17.1576	9.18778	15.9553	12.8539	14.866	3.67709	10.1338	16.4004	1.17165
ESI+	478.22	5.315	HMDB0010315	4-Hydroxyandrostenedione glucuronide	C25H34O9	478.22	1	216.659	187.11	238.136	251.659	222.465	211.456	182.081	149.326	147.356	114.032	196.758	195.047	142.172	153.213	186.388	158.056	169.003	178.435	167.033	128.561	151.917	143.165	130.028	122.549	190.559	178.112	250.308	278.249	256.439	211.546	268.377	286.061	251.391	86.3454	224.658	219.777	237.95	327.499	254.265	275.739	234.666	256.971
ESI+	479.337	8.002	HMDB0010407	GPC(p-16:0)	C24H50NO6P	479.338	0	2.76333	3.42389	3.10068	2.21652	3.05244	3.4939	2.67047	3.91563	4.62142	3.86341	7.26774	12.1833	3.07557	1.05218	3.14365	10.5792	0.51564	0.667637	25.3219	26.4553	17.8544	1.62428	21.3175	4.15864	20.2978	4.84875	5.53928	1.91723	0.53129	1.76964	26.3418	12.8974	21.6513	1.56131	8.87387	3.3064	2.27989	3.38513	23.9103	4.01938	1.81347	35.7214
ESI+	481.316	8.859	HMDB0010381	LPC(15:0)	C23H48NO7P	481.317	2	6.05344	4.39186	4.74218	6.47741	5.9441	6.17802	5.6455	7.31321	8.88525	7.38861	10.2619	18.3131	4.8249	3.88988	1.57936	15.9088	1.62062	2.49521	14.0178	12.6269	21.7206	1.99703	23.0993	9.5467	19.8475	20.7945	7.70461	3.83863	3.64327	2.58157	11.284	8.21914	20.3508	7.16386	11.877	3.52793	5.93593	8.96565	10.5252	16.0459	7.89516	10.4491
ESI+	484.281	9.502	HMDB0240601	GPG(16:0)	C22H45O9P	484.28	3	5834.01	6170.28	5987.41	5225.67	6339.18	6403.55	5890.49	6597.17	6641.55	6808.13	8118.44	7967.95	6755.61	7004.4	7025.92	6001.14	8308.39	7236.35	8575.6	8372.93	5893.57	8758.83	6826.91	7192.18	9837.98	9047.79	6178.84	5080.15	5132.47	6725.96	7470.91	7426.04	7298.28	5689.34	6640.99	7390.53	5851.85	6529.51	6344.67	6843.71	7024.51	6228.21
ESI+	492.353	5.888	HMDB0033907	Homodolicholide	C29H48O6	492.345	16	0.716565	0.755451	0.722307	0.648286	0.725962	0.717054	0.655976	0.797792	0.833586	0.825455	0.939466	0.918701	9.73145	0.879376	5.61186	8.56392	0.948901	0.891004	9.29921	0.987281	1.77322	1.03595	0.92296	1.11636	4.24798	6.00945	0.772604	13.251	0.776624	4.45719	13.051	6.66024	0.907205	3.45773	1.42676	11.8251	3.1779	8.12273	1.23592	5.27355	10.3181	4.26424
ESI+	493.316	6.832	HMDB0010383	GPC(16:1)	C24H48NO7P	493.317	1	8.02828	7.57589	9.65559	7.39442	7.25894	9.1321	8.27375	11.3866	10.3665	11.4114	18.8214	25.9635	7.28256	2.37975	5.79742	20.2339	1.42021	2.39433	16.3805	10.6407	24.5167	4.74137	33.3921	13.3989	18.0916	17.1156	15.7521	5.03769	1.87969	3.30507	21.0899	14.9481	20.9366	8.5658	14.9264	6.68702	5.83903	6.03452	14.9194	13.47	6.85725	9.00393
ESI+	495.332	7.64	HMDB0010382	LPC(16:0)	C24H50NO7P	495.332	1	184.077	178.697	201.305	227.102	237.01	233.624	205.385	246.644	248.488	283.229	433.144	517.213	203.976	113.128	149.719	559.563	21.5127	91.8726	388.692	270.133	683.702	137.002	730.345	283.758	534.151	495.787	376.663	157.921	105.065	148.18	593.695	330.139	515.539	221.793	419.688	179.806	206.163	226.064	366.831	386.178	222.528	326.71
ESI+	505.31	2.185	HMDB0011513	LPE(20:2)	C25H48NO7P	505.317	14	0.378315	0.380264	0.376972	0.368615	0.345649	0.36063	0.355254	0.385455	0.39263	0.431322	0.449957	0.485177	0.790885	1.30732	5.17897	2.50823	0.483828	0.450708	0.491566	0.602166	4.11313	0.529987	0.487392	3.82377	0.508823	7.08772	0.396861	0.478415	0.398627	0.406927	0.437789	0.421504	0.456777	0.432023	0.937698	0.410697	2.89933	3.24079	2.84064	3.75158	0.369023	0.470489
ESI+	511.467	7.086	HMDB0240665	Lignoceroylcarnitine	C31H61NO4	511.46	14	2.16892	2.20888	2.02004	2.0684	2.80282	11.7952	3.61654	2.34743	3.5409	4.83017	1.7439	2.74295	2.64929	1.94028	1.18987	3.78336	2.62639	3.20325	2.57578	2.89578	0.85478	2.13159	4.51942	2.65725	2.99676	2.11806	1.15604	2.56876	2.32244	2.32698	5.12595	2.48185	3.32805	3.61557	1.25752	3.38541	2.37248	3.51969	2.5477	3.43268	5.40576	2.8416
ESI+	519.332	7.212	HMDB0010386	LysoPC(18:2(9Z,12Z)/0:0)	C26H50NO7P	519.332	1	38.3812	36.2816	41.1369	37.2095	39.1976	41.3456	42.3556	49.9213	46.6561	51.0398	112.531	50.0255	30.8438	13.6829	28.8141	79.7036	3.19757	13.9283	104.5	41.4277	131.653	30.0837	195.121	35.4189	65.4724	45.7087	50.9462	18.1643	36.2771	32.6901	132.193	67.8337	120.543	29.2568	70.6272	33.2827	23.6371	41.7068	116.111	32.3405	24.2765	199.76
ESI+	521.348	7.984	HMDB0010385	LPC(18:1)	C26H52NO7P	521.348	1	195.808	189.938	218.978	190.874	193.605	217.122	201.399	232.888	243.074	227.081	402.623	533.82	198.76	89.3355	132.037	536.091	13.6767	83.3855	377.263	262.702	710.693	102.88	737.701	316.093	516.033	521.372	391.424	167.152	95.051	157.58	593.514	334.909	550.632	193.292	440.292	186.17	195.091	226.778	340.641	388.792	250.577	291.475
ESI+	523.363	8.931	HMDB0010384	LPC(18:0)	C26H54NO7P	523.364	2	42.742	39.0806	38.8605	45.8654	41.6378	45.5168	49.3254	50.8554	51.2509	56.6212	113.14	69.497	33.5048	19.4467	25.8771	101.017	5.10797	16.9019	82.3926	45.1139	164.216	24.109	179.804	49.6941	85.9016	77.465	65.7883	26.0257	20.0677	34.6966	140.095	63.7102	122.85	39.0724	74.8496	35.0127	33.0742	48.4387	86.0398	67.4222	36.9535	79.8029
ESI+	524.889	10.15	HMDB0000582	3,5-Diiodothyronine	C15H13I2NO4	524.893	9	1.42011	2.08236	3.92401	1.56273	1.42434	1.88073	5.36448	8.72001	9.49639	3.54657	1.84272	2.0716	1.46516	1.90636	1.71776	1.69281	2.18456	1.93151	1.91443	2.06408	1.71172	1.95577	1.77205	1.85635	2.04044	2.01414	1.66059	2.00684	1.69489	1.67302	1.7556	1.83917	2.11603	1.82018	1.61952	1.77185	1.95845	1.59441	2.13899	1.94387	1.54069	2.04311
ESI+	543.332	7.243	HMDB0010395	GPC(20:4n6)	C28H50NO7P	543.332	1	40.4231	35.8399	36.5309	36.8344	36.0096	34.2279	38.5882	44.8632	47.9438	52.082	101.708	69.342	24.4331	17.245	20.6604	102.87	0.971206	6.29976	64.557	31.7206	151.852	21.2685	134.172	53.791	78.7683	75.9767	58.0554	23.9646	17.835	30.5273	141.506	48.3343	102.37	30.3669	60.4039	18.2022	22.2929	28.08	67.6219	62.0454	24.6077	53.6269
ESI+	545.348	7.666	HMDB0010394	LysoPC(20:3(8Z,11Z,14Z)/0:0)	C28H52NO7P	545.348	1	5.65956	5.84512	6.67525	5.97839	7.62971	8.91818	6.68162	6.91832	9.7043	9.49646	32.4567	11.9785	5.84801	3.38944	5.14739	14.3963	0.481081	2.71559	10.4128	5.22827	31.4427	3.4657	25.5718	5.99188	7.99818	10.2939	11.2741	3.60575	4.38048	3.67438	25.1032	17.7502	20.0975	6.51592	13.9296	3.89296	4.55757	5.83058	17.4807	7.6401	4.77587	11.994
ESI+	584.263	4.164	HMDB0000054	Bilirubin	C33H36N4O6	584.263	2	2.31265	3.26492	2.1	4.55633	2.37174	3.28101	2.47441	3.59293	3.81833	4.14678	3.99764	1.16655	2.47245	4.78098	12.3465	4.65952	0.644224	1.06008	9.65348	5.632	5.7687	1.1943	9.17636	2.37322	0.983968	1.40019	2.09309	0.587443	1.31112	2.55808	10.9407	1.346	2.41562	0.74964	1.54216	2.42201	0.708661	5.95039	8.10053	1.33808	0.469187	1.77725
ESI+	609.294	5.247	HMDB0015330	Tubocurarine	C37H41N2O6	609.296	4	27.6275	23.0028	29.7733	34.348	37.8547	36.2442	23.8342	28.3883	16.6493	17.5748	11.9024	6.84887	8.49449	3.49558	12.7129	9.71331	19.6184	24.3678	40.8408	5.89196	5.65433	15.0408	15.6605	13.2327	33.2826	17.7941	38.9338	31.1353	53.4465	27.1638	20.8182	1.7242	19.4271	38.4889	23.9898	40.7671	41.2638	25.944	5.22371	23.1827	26.4921	6.851
ESI+	622.254	9.502	HMDB0038586	O-Methylsomniferine	C37H38N2O7	622.268	22	12.2174	13.7742	8.84567	11.5064	14.38	11.8748	15.2251	9.57682	13.5754	13.0134	9.73782	12.0047	7.5036	10.9676	10.4606	7.97005	12.6907	15.6989	20.1757	13.1639	10.7698	14.5308	14.1885	15.7829	15.7584	13.5303	13.755	11.8176	10.2281	14.1487	15.7903	14.3011	18.3564	14.2718	15.0636	8.67104	11.4518	12.1659	14.0608	15.1438	10.5981	14.6565
ESI+	633.444	8.926	HMDB0008854	PE(14:1(9Z)/14:0)	C33H64NO8P	633.437	11	16.9917	17.5656	20.8532	16.4885	18.7434	18.8696	16.9528	22.5985	18.146	22.1001	20.4013	9.7965	28.1547	90.085	72.1317	8.32439	31.7851	8.28379	25.8329	10.5828	10.9539	12.6773	24.041	20.6101	44.554	18.022	6.67979	12.1736	9.27944	8.35218	10.6138	21.456	18.4459	20.2846	10.4491	6.38106	9.99173	43.326	16.0122	8.71366	11.3731	13.7169
ESI+	643.485	9.353	HMDB0004969	GlcCer(d18:1/12:0)	C36H69NO8	643.502	26	31.5751	32.6283	39.0439	37.8893	35.3428	41.8537	35.4187	42.711	39.1324	42.0971	12.746	9.58921	20.1684	24.3461	25.6139	45.5138	15.4034	24.8642	38.0022	26.7522	28.7866	20.7824	7.24102	39.7715	58.7977	36.116	30.9447	17.7233	22.4277	48.0093	54.8296	50.1411	30.8052	63.569	34.6178	36.4801	14.7258	22.1863	28.2938	35.485	47.5582	73.3519
ESI+	661.522	0.906	HMDB0011337	PE(P-16:0/15:0)	C36H72NO7P	661.505	26	67.438	47.9649	45.5338	68.1968	62.4048	74.216	62.735	98.6325	93.9405	98.2403	62.3828	95.0018	64.7059	81.8231	44.0111	60.3285	1.06703	46.8534	50.5974	114.556	114.415	58.9751	92.1203	99.9809	103.869	101.085	44.2342	118.514	53.3242	85.3547	80.819	105.956	138.91	86.8753	120.543	134.687	125.321	85.701	28.5999	114.773	28.2412	89.5957
ESI+	671.481	7.245	HMDB0008886	PE(14:2)	C37H70NO7P	671.489	12	1.10035	1.11018	1.10909	1.02164	1.08419	1.12941	1.12919	1.13389	1.39703	1.23385	1.41185	1.44527	1.13278	1.32267	1.20389	1.12981	1.37053	1.36378	1.46047	1.51168	1.36916	1.45475	1.35471	1.44542	1.5854	1.48069	1.23443	1.21557	1.17214	1.14386	1.21143	1.31049	1.35369	1.16929	1.21322	1.11167	1.08887	1.17849	1.31412	1.14553	1.18362	1.3561
ESI+	673.453	10.185	HMDB0007900	PC(28:2)	C36H68NO8P	673.468	22	16.0795	14.2789	18.5234	16.997	17.8166	15.4103	16.1174	18.3839	16.2052	17.0751	2.53703	0.465767	1.20927	2.51478	3.8018	1.90334	1.40296	2.79624	0.295697	0.356943	2.42562	2.85234	2.5118	2.47496	0.877462	2.61985	3.25022	1.31489	1.83626	1.23344	1.66585	0.470582	0.853229	0.953362	1.66011	1.81968	3.74583	1.4393	0.783377	1.59622	1.77983	0.356009
ESI+	679.441	10.952	HMDB0012330	PS(28:0)	C34H66NO10P	679.442	3	16.7972	16.0707	17.1105	17.6657	16.8735	23.6622	19.9531	20.5705	25.5042	36.476	34.0444	13.4119	24.4848	15.4837	23.4004	18.7016	7.17352	13.0854	3.08555	1.56264	34.247	23.3455	26.079	29.1208	13.0074	34.3873	29.7272	12.4828	15.1391	21.2345	15.596	10.6667	6.6417	15.041	15.6584	13.2663	18.2261	27.8805	3.62834	23.4864	14.3883	2.07395
ESI+	699.547	11.629	HMDB0004971	GlcCer(d18:1/16:0)	C40H77NO8	699.565	25	56.8427	59.2702	58.4524	73.8397	76.4388	75.0025	66.5885	84.1064	79.5327	83.3831	0.624448	0.792721	168.334	82.9197	22.1758	72.3982	9.87496	8.06612	112.7	61.3745	81.285	10.9022	6.63599	43.6725	75.354	66.9254	65.0896	5.81384	9.3933	55.5049	97.8505	142.17	130.985	87.3814	89.7894	90.3506	46.8673	18.3519	121.298	37.9606	114.53	247.547
ESI+	707.466	4.116	HMDB0012352	PS(16:0/14:0)	C36H70NO10P	707.474	10	10.9227	12.0842	9.52275	13.6635	11.4917	10.7072	9.28428	11.5248	10.8874	13.6347	1.00741	1.06353	4.14865	0.995068	1.70368	16.8091	1.06157	5.98474	15.0907	7.39486	5.33243	8.24284	1.04129	14.6558	21.9061	11.5428	10.5447	9.52276	4.66688	18.1605	15.5944	10.9504	5.17966	28.027	9.21014	10.7582	2.0265	2.61838	3.18146	13.2276	19.721	31.1397
ESI+	783.625	0.802	HMDB0011455	PE(P-18:1(9Z)/22:1(13Z))	C45H86NO7P	783.614	14	9.56009	11.0617	6.97904	8.30738	9.78097	11.1398	10.3983	14.5539	11.142	14.8872	14.5069	10.1098	7.104	9.89763	9.93279	12.434	18.8528	11.4785	7.09229	12.4026	9.15933	14.1289	17.1605	16.3994	8.40616	23.9783	5.33146	12.7102	12.3007	13.2387	18.3378	17.0912	18.7978	12.8141	8.58736	15.7655	23.6141	18.2446	9.88259	9.68078	10.9688	6.7856
ESI+	787.619	0.802	HMDB0009511	PE(22:0)	C45H90NO7P	787.645	34	3.60671	5.89216	7.41089	5.36815	8.1405	7.7259	6.21722	4.00496	5.05143	3.96211	2.39952	4.62825	9.42828	5.0056	2.58393	4.50979	0.44423	5.97086	3.44017	5.81229	5.71894	6.1544	3.62652	6.31748	4.34134	10.2605	2.4948	3.79526	4.59882	7.2294	6.8951	3.57569	7.74113	4.52149	7.48355	7.04335	9.3726	3.2909	4.74312	4.94238	5.09272	5.61467
ESI+	819.59	9.186	HMDB0010164	PS(18:0/20:0)	C44H86NO10P	819.599	10	37.6466	39.4321	36.0672	38.4255	39.7467	42.4507	38.5299	46.6547	46.3355	45.5294	15.5939	13.323	29.6075	47.3743	43.6902	52.6175	18.3603	28.6503	44.9829	42.5768	30.9014	22.8587	12.753	47.8659	73.6622	35.5318	29.9849	17.3408	26.1379	37.8002	73.5915	59.0982	42.2416	70.5855	37.7319	44.5121	13.228	20.4898	39.6846	45.004	49.4167	70.6831
ESI+	938.466	5.395	HMDB0009987	PIP(18:2/18:2)	C45H80O16P2	938.492	28	6.0408	10.4397	9.81486	6.71803	5.68493	6.50445	9.6529	11.0699	9.7337	9.31675	10.7541	25.5369	14.114	14.1952	9.19606	8.64072	11.706	13.5195	15.3509	29.837	10.7607	11.3826	14.5756	12.3306	9.98737	11.8714	10.1009	13.9664	8.99722	8.64365	9.12187	15.4838	8.86254	7.86261	7.81545	9.16299	7.46074	9.26472	16.9936	6.68223	6.55632	23.1091
[truncated: 56 more columns]
