# Supplementary material for: Identification of potential biomarkers for diagnosis of syphilis from the cerebrospinal fluid based on untargeted metabolomic analysis
Source: Royal Society of Chemistry journal article supplement (doi:10.1039/d3mo00026e), 2023-04-19
Supplement: d3mo00026e2.pdf [file d3mo00026e2.pdf]

**Supplementary Table S2.** Summary of the major mass-spectrometry-based studies performed on the syphilis patients or neurosyphilis patients to date. Table includes details about the numbers of sample, the analysis method, and the type of mass spectrometer used and biomarkers identified in previous study.

| Research model | Sample cohort (no. of samples)                                               | Analytical apparatus    | Biomarkers identified                                                                                              | Study (year)                | Ref. |
|----------------|------------------------------------------------------------------------------|-------------------------|--------------------------------------------------------------------------------------------------------------------|-----------------------------|------|
| Human serum    | syphilis (20);<br>healthy control (20)                                       | UHPLC-Q-TOF/MS<br>analy | trimethylamine N-oxide, l-arginine, lysoPC(18:0), betaine and acetylcarnitine                                      | Liu LL <i>et al.</i> (2019) | [1]  |
| Human CSF      | neurosyphilis (18);<br>syphilis/non-neurosyphilis (18);<br>syphilis-free(18) | UHPLC-Q-TOF/MS          | L-gulono-gamma-lactone, D-mannose, N-acetyl-L-tyrosine, hypoxanthine, and S-methyl-5'-thioadenosine                | Liu LL <i>et al.</i> (2019) | [2]  |
| Human CSF      | Neurosyphilis (15);<br>non-neurosyphilis (14)                                | LC-MS                   | Bilirubin, L-histidine, prostaglandin E2, alpha-kamlolenic acid, and butyryl-L-carnitine and palmitoyl-L-carnitine | Qi S <i>et al.</i> (2019)   | [3]  |

[1] Liu L.L., Lin Y., Zhuang J.C., Ren J., Jiang X.Y., Chen M.H., et al. (2019). Analysis of serum metabolite profiles in syphilis patients by untargeted metabolomics. *J Eur Acad Dermatol Venereol.* 3(7):1378-1385. doi: 10.1111/jdv.15530.

[2] Liu L.L., Lin Y., Chen W., Tong M.L., Luo X., Lin L.R., et al. (2019). Metabolite Profiles of the Cerebrospinal Fluid in Neurosyphilis Patients Determined by Untargeted Metabolomics Analysis. *Front Neurosci.*, 26;13:150. doi: 10.3389/fnins.2019.00150.

[3] Qi S., Xu Y., Luo R., Li P., Huang Z., Huang S., et al. (2019). Novel Biochemical Insights in the Cerebrospinal Fluid of Patients with Neurosyphilis Based on a Metabonomics Study. *J Mol Neurosci.* 69(1):39-48. doi: 10.1007/s12031-019-01320-0.
